# Supplementary material for: Food and beverage portion sizes in Australian children: a secondary analysis of 1995 and 2007 national data
Source: PubMed Central journal article supplement (PMC4061520; doi:10.1186/1471-2458-14-517), 2014-05-28
Supplement: 1471-2458-14-517-S1.pdf [file 1471-2458-14-517-S1.pdf]

## **Additional files – Tables S1 to S7**

|                                                                                                      |     |
|------------------------------------------------------------------------------------------------------|-----|
| <b>Table S1</b> NNS and ANCNPAS Food Classification                                                  | P2  |
| <b>Table S2</b> Percentage Consumption of Selected Foods in Children aged 2-4 years and 5-8 years    | P13 |
| <b>Table S3</b> Percentage Consumption of Selected Foods in Children aged 9-12 years and 13-16 years | P23 |
| <b>Table S4</b> Changes to portion size between 1995 and 2007 for 2-4 year old children              | P33 |
| <b>Table S5</b> Changes to portion size between 1995 and 2007 for 5-8 year old children              | P37 |
| <b>Table S6</b> Changes to portion size between 1995 and 2007 for 9-12 year old children             | P41 |
| <b>Table S7</b> Changes to portion size between 1995 and 2007 for 13-16 year old children            | P45 |

**Table S1: NNS and ANCPAS Food Classification**

| Question  | FFQ Item                                                                                                   | NNS (1995) Foods                                                                                                    | ANCPAS (2007) Foods                                                                                                                             |
|-----------|------------------------------------------------------------------------------------------------------------|---------------------------------------------------------------------------------------------------------------------|-------------------------------------------------------------------------------------------------------------------------------------------------|
| D1        | DIET soft drink eg. Diet coke                                                                              | Soft drinks, artificially sweetened                                                                                 | Soft drink, intense sweetened                                                                                                                   |
| D2        | Soft drink (NOT DIET) including flavoured mineral water eg. lemonade, coke, fanta, flavoured mineral water | Soft drink,<br>Water, mineral, fruit flavoured                                                                      | Water, mineral, with 5% fruit<br>Water, mineral, fruit flavours<br>Soft drink                                                                   |
| D3        | Water - including bottled water. unflavoured mineral water, tap water                                      | Water, ...                                                                                                          | Water, tap<br>Water, sports type<br>Water, rainwater<br>Water, mineral, natural<br>Water, carbonated or soda<br>Water, bottled..<br>Water, bore |
| D4        | Fruit juice-based drinks eg. orange juice or Popper                                                        | Single fruit juices                                                                                                 | Juice concentrate,<br>Juice,<br>Vegetable blend –Juice Plus                                                                                     |
| D5        | Cordial or 'make up' eg. Cottee's crush, raspberry                                                         | Fruit-based or flavoured cordials and drinks                                                                        | Cordial,<br>Drink, fruit flavoured,<br>Fruit drink<br>Fruit puree drink,                                                                        |
| D6        | Tea or Coffee                                                                                              | Tea, coffee or coffee substitutes                                                                                   | Coffee mix,<br>Coffee,<br>Tea,                                                                                                                  |
| D7        | Beer                                                                                                       | Beers                                                                                                               | Beer, lager<br>Beer, reduced alcohol or light style                                                                                             |
| D8        | Wine or wine coolers eg. West Coast cooler                                                                 | Wine, ....                                                                                                          | Wine                                                                                                                                            |
| D9        | Spirits eg. vodka, bourbon                                                                                 | Brandy, ...<br>Whiskey, ...<br>Gin, ...<br>Rum, ...<br>Vodka, ...<br>Spirit, ...<br>Liqueur, ...<br>Mixed Drink, .. | Alcoholic Soda<br>Liqueur<br>Rum, dark & light coloured<br>Whisky<br>Vodka                                                                      |
| DF1 + DF3 | Soy Milk                                                                                                   | Milk - soy (unflavoured)                                                                                            | Soy beverage, unflavoured                                                                                                                       |
| DF1 + DF3 | Whole Milk                                                                                                 | Milk - fat increased/whole milk                                                                                     | Milk, cow, fluid, extra creamy<br>Milk, cow, fluid, regular fat                                                                                 |
| DF1 + DF3 | Reduced Fat Milk                                                                                           | Milk - fat reduced                                                                                                  | Milk, cow, fluid reduced fat -1-2%-<br>Milk, cow, fluid, reduced fat                                                                            |
| DF1 + DF3 | Skim Milk                                                                                                  | Milk, fluid, skim, non-fat                                                                                          | Milk, cow, fluid, skim                                                                                                                          |

**Table S1: NNS and ANCNPAS Food Classification (cont)**

| Question | FFQ Item                                                                      | NNS (1995) Foods                                                                                                                                                                                                                                                                                                                                                                                     | ANCNPAS (2007) Foods                                                                                                                                                                                                                                              |
|----------|-------------------------------------------------------------------------------|------------------------------------------------------------------------------------------------------------------------------------------------------------------------------------------------------------------------------------------------------------------------------------------------------------------------------------------------------------------------------------------------------|-------------------------------------------------------------------------------------------------------------------------------------------------------------------------------------------------------------------------------------------------------------------|
| DF2      | Flavoured milk eg. Moove, Oak, hot chocolate, milkshake, thickshake, smoothie | Flavoured milk, ...                                                                                                                                                                                                                                                                                                                                                                                  | Beverage, banana or similar flavour<br>Beverage, caramel, honeycomb or strawberry flavour<br>Beverage, chocolate flavour<br>Beverage, drinking chocolate<br>Beverage, from unfortified base<br>Beverage, malt flavour<br>Milk, cow, fluid, flavoured<br>Milkshake |
| DF4      | Cream or sour cream                                                           | Cream, .....                                                                                                                                                                                                                                                                                                                                                                                         | Cream, sour<br>Cream, whipped                                                                                                                                                                                                                                     |
| DF5      | Ice cream - vanilla, chocolate, strawberry, sundaes, cones                    | ice cream -vanilla rich/regular fat<br>ice cream -other flavour regular fat/rich<br>ice cream -reduced fat<br>ice cream -other                                                                                                                                                                                                                                                                       | Ice cream sundae<br>Ice cream, reduced fat<br>Ice cream, regular fat<br>Ice cream, soft serve                                                                                                                                                                     |
| DF6      | Frozen yoghurt                                                                | Frozen yoghurts, all types                                                                                                                                                                                                                                                                                                                                                                           | Yoghurt, frozen                                                                                                                                                                                                                                                   |
| DF7      | Yoghurt (not frozen) plain or flavoured eg. Ski, Yoplait, Vaalia              | Yoghurt, ...                                                                                                                                                                                                                                                                                                                                                                                         | Yoghurt, (except frozen)                                                                                                                                                                                                                                          |
| DF8      | Cottage cheese or ricotta                                                     | Cheese, cottage<br>Cheese, ricotta                                                                                                                                                                                                                                                                                                                                                                   | Cheese, cottage<br>Cheese, ricotta..                                                                                                                                                                                                                              |
| DF9      | Cheese including cheese on sandwiches, biscuits or on toast                   | Total other cheese                                                                                                                                                                                                                                                                                                                                                                                   | Cheese, blended<br>Cheese, cheddar<br>Cheese, Colby<br>Cheese, Feta                                                                                                                                                                                               |
| DF10     | Cheese spread, cream cheese                                                   | Cheese, cream<br>Cheese, spread                                                                                                                                                                                                                                                                                                                                                                      | Cheese spread,<br>Cheese, cream<br>Cheese, spread                                                                                                                                                                                                                 |
|          |                                                                               |                                                                                                                                                                                                                                                                                                                                                                                                      |                                                                                                                                                                                                                                                                   |
| B1       | Muesli                                                                        | Muesli, ...                                                                                                                                                                                                                                                                                                                                                                                          | Muesli, commercial,<br>Muesli, homemade                                                                                                                                                                                                                           |
| B2       | Cooked porridge                                                               | Breakfast cereal, hot porridge type                                                                                                                                                                                                                                                                                                                                                                  | Oats,<br>Porridge,                                                                                                                                                                                                                                                |
| B3       | Breakfast cereal eg. Weet-bix, Nutri-grain, Cornflakes Sultana Bran           | Breakfast cereal, low added sugar, puffed, flakes, extruded etc. single cereal — corn, rice<br>Breakfast cereal, wheat-based biscuits and shredded wheat<br>Breakfast cereal, wheat, low added sugar, puffed, flakes<br>Breakfast cereal, wheat, with added fruit or nuts<br>Breakfast cereal, grain mixtures<br>Breakfast cereal, grain and fruit/nut mixtures<br>Breakfast cereal, other sweetened | Breakfast Cereal,                                                                                                                                                                                                                                                 |

**Table S1: NNS and ANCNPAS Food Classification (cont)**

| Question | FFQ Item                                                                                                | NNS (1995) Foods                                                                     | ANCNPAS (2007) Foods                                                                                                                                    |
|----------|---------------------------------------------------------------------------------------------------------|--------------------------------------------------------------------------------------|---------------------------------------------------------------------------------------------------------------------------------------------------------|
| B5       | Bread, pita bread, roll or toast all types – White                                                      | Bread, white<br>Bread roll, white                                                    | Bread, from white flour<br>Bread roll, from white flour<br>Bread or bread roll, from white flour                                                        |
| B5       | Bread, pita bread, roll or toast all types – Mixed Grain                                                | Bread, mixed grain<br>Bread roll, mixed grain<br>Bread, light rye/black/pumpernickel | Bread, mixed grain<br>Bread roll, mixed grain<br>Bread or bread roll, mixed grain                                                                       |
| B5       | Bread, pita bread, roll or toast all types - Wholemeal                                                  | Bread, wholemeal<br>Bread roll, wholemeal                                            | Bread, from wholemeal flour<br>Bread roll, from wholemeal flour<br>Bread or bread roll, from wholemeal flour                                            |
| B6       | English muffin, bagel or crumpet                                                                        | English muffins/crumpets and bagels                                                  | Bagel<br>Crumpet,<br>Muffin, English-style,<br>Muffin, savoury,                                                                                         |
| B7       | Rice                                                                                                    | Rice and rice products                                                               | Rice, brown<br>Rice, flavoured<br>Rice, purchased as<br>Rice, white                                                                                     |
| B8       | Other grains eg. cous cous, burghul                                                                     |                                                                                      | Cous cous,<br>Cornmeal –polenta<br>Millet, puffed                                                                                                       |
| B9       | Noodles eg. egg noodles (yellow), rice noodles (white)                                                  | Noodles, Asian style                                                                 | Noodle,                                                                                                                                                 |
| B10      | Pasta eg. spaghetti, lasagne, pasta bake                                                                | Pasta and egg noodles/filled pasta, ravioli                                          | Gnocchi, potato, boiled<br>Macaroni cheese,<br>Pasta or noodles, buckwheat flour<br>Pasta, ... filled<br>Pasta, white<br>Pasta, wholemeal               |
|          |                                                                                                         |                                                                                      |                                                                                                                                                         |
| S1       | Cakes, sweet muffins, scones, pikelets, pancakes, hot cakes eg. apple muffin, chocolate cake, lamington | Cake,....<br>Bun,....<br>Muffin,.....<br>Scone,....<br>Batter-based product,....     | Brownie, chocolate<br>Cake,<br>Cookies,<br>Doughnut<br>Hotcake,<br>Muffin, cake or American style<br>Pancake, plain<br>Pikelet or drop scone,<br>Scone, |

**Table S1: NNS and ANCNPAS Food Classification (cont)**

| Question | FFQ Item                                                                                                  | NNS (1995) Foods                                                                                                              | ANCNPAS (2007) Foods                                                                                                                                                                                                                                                                                                                                                                                                                                                         |
|----------|-----------------------------------------------------------------------------------------------------------|-------------------------------------------------------------------------------------------------------------------------------|------------------------------------------------------------------------------------------------------------------------------------------------------------------------------------------------------------------------------------------------------------------------------------------------------------------------------------------------------------------------------------------------------------------------------------------------------------------------------|
| S2       | Sweet pies or sweet pastries eg. apple pie, Danish                                                        | Sweet pastry, ....<br>Tart, ....<br>Slice, ....                                                                               | Baklava<br>Bun or scroll,<br>Croissant,<br>Danish style pastry,<br>Dumpling, sweet<br>Éclair, chocolate<br>Pie, apple<br>Pie, apricot<br>Pie, lemon<br>Pie, pumpkin<br>Pie, pecan<br>Pie, fruit -<br>Tart,<br>Slice,                                                                                                                                                                                                                                                         |
| S3       | Other puddings or desserts (not ice cream) eg. chocolate mousse, sticky date pudding                      | Custards, and sweet sauces, milk-based<br>Dairy desserts, smooth or gelatin-based dairy desserts<br>Sugar-based desserts, ... | Crumble,<br>Custard, dairy,<br>Custard, egg,<br>Dairy or yoghurt dessert,<br>Dessert, Bavarian cream,<br>Fudge,<br>Mousse,<br>Pudding,<br>Rum balls<br>Trifle, homemade<br>Souffle, berry                                                                                                                                                                                                                                                                                    |
| S4       | Plain sweet biscuits eg. Arrowroot, Morning Coffee, Tiny Teddies                                          | Biscuit, sweet, plain ...<br>Biscuit, sweet, fruit filled ....                                                                | Biscuits, shortbread style<br>Biscuits, sugar-glazed pastry<br>Biscuits, sweet, Anzac<br>Biscuits, sweet, chocolate chip<br>Biscuits, sweet, dreid fruit filling<br>Biscuits sweet, ginger flavoured<br>Biscuits, sweet, iced<br>Biscuits, sweet, jam filled<br>Biscuits, sweet, macaroon<br>Biscuit, sweet, oatmeal<br>Biscuit, sweet, plain<br>Biscuit, sweet, sponge finger<br>Biscuit, sweet, wheatmeal<br>Biscuit, sweet, with dried fruit<br>Biscuit, sweet, with nuts |
| S5       | Cream or chocolate biscuits eg. Tim Tams, shortbread cream                                                | Sweet biscuits, cream-filled<br>Sweet biscuits, chocolate-coated, chocolate chip                                              | Biscuits, sweet, chocolate coated<br>Biscuits, sweet, chocolate flavour.<br>Biscuits, sweet, chocolate topped<br>Biscuit, sweet, cream filled                                                                                                                                                                                                                                                                                                                                |
| S6       | Dry or savoury biscuits, crispbread, crackers eg. Vita Weats, Saos, Jatz, Shapes, rice crackers, Cruskits | Biscuit, savoury                                                                                                              | Biscuit, savoury cake<br>Biscuit, savoury cracker<br>Biscuit, savoury crispbread<br>Biscuit, savoury<br>Biscuit, sweet, vanilla                                                                                                                                                                                                                                                                                                                                              |

**Table S1: NNS and ANCNPAS Food Classification (cont)**

| Question | FFQ Item                                                                     | NNS (1995) Foods                                                   | ANCNPAS (2007) Foods                                                                               |
|----------|------------------------------------------------------------------------------|--------------------------------------------------------------------|----------------------------------------------------------------------------------------------------|
| S7       | Savoury combination snacks - biscuits and cheese eg. Le Snak, Snack abouts   | -                                                                  | Savoury snack, biscuit and cheese, ...                                                             |
| S8       | Sweet combination snacks eg. Dunkaroos                                       | -                                                                  | -                                                                                                  |
| S9       | Snack noodles eg. 2-minute noodles, Monster noodles                          | Snack, noodle-based                                                | Noodle, wheat, instant                                                                             |
| S10      | Fruit bars eg. Roll Ups                                                      | Fruit bar and fruit-based confectionery                            | Fruit leather                                                                                      |
| S11      | Snack bars eg. K-time twist bar                                              | -                                                                  | Bar, fruit filled<br>Bar, snack                                                                    |
| S12      | Muesli bars eg. Yoghurt Tops                                                 | Bar, muesli...                                                     | Bar, breakfast and snack style, cereal<br>Bar, muesli                                              |
|          |                                                                              |                                                                    |                                                                                                    |
| M1       | Mince dish eg. spaghetti bolognese, rissoles, shepherd's pie, lasagne        |                                                                    | Beef, mince<br>Cannelloni,, beef<br>Lamb, mince<br>Lasagne,<br>Pasta bake, beef<br>Pasta Bolognese |
| M2       | Beef or lamb pieces and sauce WITHOUT vegetables eg. beef stroganoff         | Mixed dishes where beef or veal is the major component             | Beef, curry<br>Beef, stirfry<br>Beef, casserole or stew<br>Lamb, curry                             |
| M3       | Beef or lamb pieces and <i>sauce</i> WITH vegetables                         | Mixed dishes where lamb or pork, bacon, ham is the major component | Lamb, stewed or casserole<br>Pork, stirfry<br>Pork, sweet and sour                                 |
| M5       | Plain meat (beef or lamb) (eg. roast, chops, steak) WITH vegetables or salad |                                                                    |                                                                                                    |
| M11      | Pork pieces and <i>sauce</i> WITHOUT vegetables eg. sweet and sour pork      |                                                                    |                                                                                                    |
| M12      | Pork pieces and <i>sauce</i> WITH vegetables eg. stir fry                    |                                                                    |                                                                                                    |

**Table S1: NNS and ANCNPAS Food Classification (cont)**

| Question | FFQ Item                                                                           | NNS (1995) Foods                                          | ANCNPAS (2007) Foods                                                                                                                                                   |
|----------|------------------------------------------------------------------------------------|-----------------------------------------------------------|------------------------------------------------------------------------------------------------------------------------------------------------------------------------|
| M4       | Plain meat (beef or lamb) (eg. roast, chops, steak)<br>WITHOUT vegetables or salad | Beef<br>Lamb<br>Veal                                      | Beef, (except mince)<br>Lamb,<br>Veal,                                                                                                                                 |
| M6       | Chicken pieces and <i>sauce</i><br>WITHOUT vegetables eg. satay chicken            | Mixed dishes where poultry or game is the major component | Chicken, salad<br>Chicken, stew or casserole<br>Chicken, stir fry<br>Chicken, curry                                                                                    |
| M7       | Chicken pieces and <i>sauce</i> WITH vegetables eg. stir fry                       |                                                           |                                                                                                                                                                        |
| M10      | Plain chicken (eg. roast or BBQ)<br>WITH vegetables                                |                                                           |                                                                                                                                                                        |
| M8       | Chicken crumbed eg. chicken nuggets, KFC pieces, schnitzel                         | Chicken, crumbed ....                                     | Chicken, nugget<br>Chicken, various pieces<br>Chicken,....., crumbed                                                                                                   |
| M9       | Plain chicken (eg. roast or BBQ)<br>WITHOUT vegetables                             | Chicken<br>Other poultry                                  | Chicken, breast<br>Chicken, baked<br>Chicken, cooked<br>Chicken, drumstick<br>Chicken, grilled.<br>Chicken, kebab<br>Chicken, thigh<br>Chicken, whole<br>Chicken, wing |
| M13      | Plain pork (eg. roast or chops)<br>WITHOUT vegetables                              | Pork                                                      | Pork                                                                                                                                                                   |
| M15      | Liver – beef, calf, chicken (including paté)                                       | Organ meats and offal, products and dishes                | Chicken, liver<br>Pate                                                                                                                                                 |

**Table S1: NNS and ANCNPAS Food Classification (cont)**

| Question     | FFQ Item                                        | NNS (1995) Foods                                                                                                                                                                                                                                                                                                                                             | ANCNPAS (2007) Foods                                                                                                                                                                                                                                                                                                         |
|--------------|-------------------------------------------------|--------------------------------------------------------------------------------------------------------------------------------------------------------------------------------------------------------------------------------------------------------------------------------------------------------------------------------------------------------------|------------------------------------------------------------------------------------------------------------------------------------------------------------------------------------------------------------------------------------------------------------------------------------------------------------------------------|
| M16 +<br>M17 | Fish                                            | Barramundi, ...<br>Blackfish, ...<br>Blue Grenadier, ...<br>Bream, ...<br>Cod, ...<br>Trout, ...<br>Dory, ...<br>Flathead, ...<br>Flounder, ...<br>Kingfish, ...<br>Leather jacket, ...<br>Mullet, ..<br>Mackerel, ...<br>Perch, ...<br>Salmon, ...<br>Shark, ....<br>Snapper, ...<br>Tailor, ...<br>Trevally, ...<br>Tuna, ...<br>Whiting, ...<br>Fish, ... | Bassa –basa-,<br>Blue grenadier – hoki -,<br>Bream<br>Fish finger, ...<br>Fish,<br>Flathead,<br>Mullet, yelloweye,<br>Whiting,<br>Trout<br>Trevally, dory, ling, cod, flounder or sole<br>Snapper,<br>Shark-flake- skinless fillet,<br>Sliver perch,<br>Barramundi<br>Cod,<br>Mulloway,<br>Salmon,<br>Tuna, yellowfin steaks |
| M18          | Canned tuna, salmon, sardines including patties | Anchovy, canned .....<br>Herring, canned ....<br>Mackeral, canned ...<br>Salmon, ..., canned ...<br>Sardine, canned ...<br>Tuna, canned .....                                                                                                                                                                                                                | Anchovy, canned<br>Salmon, canned<br>Tuna, canned,<br>Tuna, flavoured, canned<br>Sardine, canned<br>Fish cake                                                                                                                                                                                                                |
| M19          | Other seafood eg. prawns, lobster               | Crab, ...<br>Lobster, ..<br>Bug, ...<br>Prawn, ...<br>Yabbie, ...<br>Abalone, ...<br>Calamari, ...<br>Clam, ...<br>Mussel, ...<br>Oyster, ...<br>Scallop, ...                                                                                                                                                                                                | Crab, various types,<br>Crabmeat,<br>Lobster,<br>Mussel, green,<br>Oyster, baked or grilled<br>Oyster, raw<br>Prawn,<br>Squid or calamari,<br>Scallop,                                                                                                                                                                       |
| M20<br>M21   | Creamy soup<br>Clear soup with rice or noodles  | Soup, ...                                                                                                                                                                                                                                                                                                                                                    | Soup, ...                                                                                                                                                                                                                                                                                                                    |
| M22          | Tacos, burritos, enchiladas                     | Taco and tortilla-based dishes                                                                                                                                                                                                                                                                                                                               | Burrito,<br>Enchilada,<br>Taco,                                                                                                                                                                                                                                                                                              |
| M23          | Sausages, frankfurts, Pluto Pup                 | Sausage<br>Frankfurts, and saveloys                                                                                                                                                                                                                                                                                                                          | Frankfurt or cheerios,<br>Sausage,                                                                                                                                                                                                                                                                                           |
| M24          | Hamburger - all types                           | Chickenburger<br>Fishburger<br>Hamburger                                                                                                                                                                                                                                                                                                                     | Chickenburger<br>Fishburger,<br>Hamburger,                                                                                                                                                                                                                                                                                   |
| M25          | Pizza                                           | Pizza                                                                                                                                                                                                                                                                                                                                                        | Pizza,                                                                                                                                                                                                                                                                                                                       |



**Table S1: NNS and ANCNPAS Food Classification (cont)**

| Question | FFQ Item                                                             | NNS (1995) Foods                                    | ANCNPAS (2007) Foods                                                                                                                                                                                                                                                                       |
|----------|----------------------------------------------------------------------|-----------------------------------------------------|--------------------------------------------------------------------------------------------------------------------------------------------------------------------------------------------------------------------------------------------------------------------------------------------|
| M26      | Pie, sausage roll, chiko roll                                        | Chiko roll<br>Meat pie<br>Sausage roll              | Chiko roll, deep fired<br>Pie, meat.<br>Pie, steak<br>Sausage roll,                                                                                                                                                                                                                        |
| M27      | Hot dog                                                              | Hot dog                                             | -                                                                                                                                                                                                                                                                                          |
| M28      | Savoury pastries eg. spinach and cheese triangles                    | Other savoury pastries                              | Cannelloni, spinach and ricotta<br>Curry puff, beef,<br>Dim sim, meat and vegetable filling<br>Dumpling, meat filled<br>Dumpling, prawn filled<br>Pastie, vegetable<br>Pastry, cheese filling.<br>Pastry, spinach and cheese filling .<br>Pastry, spring roll<br>Pastry, vegetable filling |
| M29      | Hash browns, potato scallops                                         | Hash Brown,<br>Potato, gems<br>Potato, scallops     | Potato, gems<br>Potato, hash brown<br>Potato, mashed & crumbed<br>Potato, scallop                                                                                                                                                                                                          |
|          |                                                                      |                                                     |                                                                                                                                                                                                                                                                                            |
| O1       | Chips (not potato) eg. Twisties, corn chips, burger rings            | Corn snacks and extruded snacks                     | Corn chips<br>Crisp or chip, soy<br>Crisp or chip, vegetable,<br>Crisp, savoury                                                                                                                                                                                                            |
| O2       | Potato chips or crisps eg. plain, salt and vinegar                   | Potato crisps                                       | Crisp or chip, potato<br>Potato straws                                                                                                                                                                                                                                                     |
| O3       | Ice block – creamy eg. Paddle Pop, Magnum, Cornetto                  | Ice cream, individual bar, stick and cone varieties | Ice cream bar<br>Ice cream, stick                                                                                                                                                                                                                                                          |
| O4       | Ice block – water eg. Frosty Fruit, lemonade                         | Water ice confection, gelato                        | Gelato, various flavours, commercial<br>Ice confection, stick                                                                                                                                                                                                                              |
| O5       | Chocolate eg. plain chocolate, Mars Bar, Snickers, Milky Way         | Chocolate and chocolate-based confectionery         | Chocolate or chocolate bar<br>Chocolate<br>Rocky Road<br>Turkish delight                                                                                                                                                                                                                   |
| O6       | Lollies without chocolate eg. lollipops, snakes, Skittles, Starburst | Other confectionery                                 | Caramels<br>Honeycomb, plain<br>Liquorice<br>Marshmallow<br>Sugar confectionary                                                                                                                                                                                                            |
| O7       | Low fat salad dressing or mayonnaise                                 | Mayonnaise and salad dressing - low fat             | Dressing, reduced fat<br>Mayonnaise, low fat                                                                                                                                                                                                                                               |
| O8       | Salad dressing or mayonnaise - not low fat                           | Mayonnaise and salad dressing - full fat            | Dressing, regular<br>Mayonnaise, full fat                                                                                                                                                                                                                                                  |
| O9       | Nuts eg. peanuts, almonds                                            | Nuts (excluding coconut)                            | Nut<br>Nuts, mixed                                                                                                                                                                                                                                                                         |

**Table S1: NNS and ANCNPAS Food Classification (cont)**

| Question | FFQ Item                                                              | NNS (1995) Foods                                         | ANCNPAS (2007) Foods                                                                      |
|----------|-----------------------------------------------------------------------|----------------------------------------------------------|-------------------------------------------------------------------------------------------|
| O10      | Jam, honey, golden syrup, marmalade                                   | Honey, jam, lemon butter                                 | Honey<br>Jam<br>Marmalade<br>Syrup, maple.<br>Syrup, golden                               |
| O11      | Peanut butter, Nutella                                                | Peanut butter, chocolate and hazelnut spread             | Peanut butter, smooth & crunchy<br>Spread, hazelnut & chocolate flavoured                 |
| O12      | Vegemite, Mighty Mite, Promite, Marmite                               | -                                                        | Spread, yeast                                                                             |
| O13      | Tomato sauce, barbecue sauce                                          | Sauce, tomato<br>Sauce, barbecue                         | Sauce, tomato<br>Sauce, barbecue                                                          |
| O14      | Devon, salami                                                         | Salami,<br>Chicken roll,<br>Stassburg,<br>Luncheon meats | Kabana or cabanossi<br>Salami                                                             |
| O15      | Bacon, ham                                                            | Bacon<br>Ham                                             | Bacon<br>Ham                                                                              |
| O16      | Eggs eg. boiled, scrambled                                            | Egg                                                      | Egg                                                                                       |
| O17      | Jelly                                                                 | Jelly, made up                                           | Jelly, made up                                                                            |
|          |                                                                       |                                                          |                                                                                           |
| F1       | Hot chips bought from a shop (eg. McDonald's fries) or cooked at home | Potato - hot chips                                       | Potato, chips                                                                             |
| F2       |                                                                       |                                                          | Potato, fries<br>Potato, wedged                                                           |
| F3       | Potato boiled, mashed, baked                                          | Potato - boiled, mashed, baked                           | Potato, baked<br>Potato, boiled<br>Potato, mashed,<br>Potato, peeled,<br>Potato, unpeeled |
| F4       | Pumpkin                                                               | Pumpkin                                                  | Pumpkin, peeled                                                                           |
| F5       | Sweet potato                                                          | Sweet potato                                             | Sweet potato,                                                                             |
| F6       | Cauliflower                                                           | Cauliflower                                              | Cauliflower,                                                                              |
| F7       | Green beans                                                           | Beans - green and snake                                  | Bean, green<br>Bean, broad<br>Beans, not further specified                                |
| F8       | Spinach                                                               | Spinach and silverbeet                                   | Mixed greens<br>Spinach<br>Silverbeet                                                     |
| F9       | Cabbage or brussel sprouts                                            | Cabbage and brussel sprouts                              | Brussels sprout<br>Cabbage                                                                |
| F10      | Peas                                                                  | Peas (including snow peas)                               | Pea, green<br>Pea, split<br>Snow pea                                                      |
| F11      | Broccoli                                                              | Broccoli                                                 | Broccoli                                                                                  |
| F12      | Carrots                                                               | Carrots                                                  | Carrot                                                                                    |

**Table S1: NNS and ANCNPAS Food Classification (cont)**

| Question | FFQ Item                                       | NNS (1995) Foods                                                                                                                                            | ANCNPAS (2007) Foods                                                                                                                                                                                                                                                                                          |
|----------|------------------------------------------------|-------------------------------------------------------------------------------------------------------------------------------------------------------------|---------------------------------------------------------------------------------------------------------------------------------------------------------------------------------------------------------------------------------------------------------------------------------------------------------------|
| F13      | Zucchini, eggplant, squash                     | Squash<br>Zucchini<br>Eggplant                                                                                                                              | Eggplant<br>Okra<br>Zucchini<br>Squash                                                                                                                                                                                                                                                                        |
| F14      | Capsicum                                       | Capsicum                                                                                                                                                    | Capsicum                                                                                                                                                                                                                                                                                                      |
| F15      | Corn, sweetcorn, corn on the cob               | Corn                                                                                                                                                        | Sweetcorn                                                                                                                                                                                                                                                                                                     |
| F16      | Mushrooms                                      | Mushrooms                                                                                                                                                   | Mushroom                                                                                                                                                                                                                                                                                                      |
| F17      | Tomatoes                                       | Tomatoes (includes canned and sun dried)                                                                                                                    | Tomato, common                                                                                                                                                                                                                                                                                                |
| F18      | Lettuce                                        | Lettuce                                                                                                                                                     | Lettuce, raw                                                                                                                                                                                                                                                                                                  |
| F19      | Celery, cucumber                               | Celery<br>Cucumber                                                                                                                                          | Celery Cucumber                                                                                                                                                                                                                                                                                               |
| F20      | Avocado                                        | Avocados                                                                                                                                                    | Avocado, raw                                                                                                                                                                                                                                                                                                  |
| F21      | Onion, spring onion, leek                      | Onions, leeks, spring onions and shallots                                                                                                                   | Onion, mature<br>Onion, spring Shallot<br>Leek                                                                                                                                                                                                                                                                |
| F22      | Soybeans, tofu                                 | Soy beans<br>Tofu                                                                                                                                           | Bean, soya<br>Tofu –soy bean curd                                                                                                                                                                                                                                                                             |
| F23      | Baked beans                                    | Baked beans                                                                                                                                                 | Baked beans                                                                                                                                                                                                                                                                                                   |
| F24      | Other beans, lentils eg. chickpeas, split peas | Other mature legumes and pulses<br>Other legume and pulse products<br>Other Beans - broad, butter, kidney                                                   | Bean, black<br>Bean, butter<br>Bean, lima<br>Bean, mixed<br>Bean, red kidney<br>Beans, refried<br>Chickpea<br>Lentil                                                                                                                                                                                          |
| F25      | Canned fruit eg. peaches, Two fruits           | Fruit - canned, mixed<br>Fruit - canned single                                                                                                              | Apple, canned in syrup<br>Apricot, canned<br>Peach, canned<br>Pear, canned<br>Fruit, canned                                                                                                                                                                                                                   |
| F26      | Fruit salad                                    | Fruit salad (not canned)                                                                                                                                    | Fruit salad                                                                                                                                                                                                                                                                                                   |
| F27      | Dried fruit eg. sultanas, dried apricots       | Fruit NFS, dried<br>Apple, dried<br>Apricot, dried<br>Banana, chip<br>Berries, dried<br>Date, dried<br>Fig, dried<br>Mixed fruit, dried<br>Prune<br>Sultana | Apple, dried<br>Apricot, dried<br>Banana chip<br>Blueberry, dried<br>Berries, mixed -strawberry, raspberry, blueberry, blackberry-, dried<br>Cranberry, dried<br>Currant, dried<br>Date, dried<br>Fig, dried<br>Mango, dried<br>Mixed fruit, dried<br>Pineapple, dried<br>Prune –dried plum<br>Sultana, dried |

**Table S1: NNS and ANCPAS Food Classification (cont)**

| Question | FFQ Item                                        | NNS (1995) Foods                                                                                        | ANCPAS (2007) Foods                                                                                                                                                                  |
|----------|-------------------------------------------------|---------------------------------------------------------------------------------------------------------|--------------------------------------------------------------------------------------------------------------------------------------------------------------------------------------|
| F28      | Apple or pear                                   | Apple, ....<br>Pear, ....                                                                               | Apple, green skin<br>Apple, peeled, raw<br>Apple, red skin<br>Pear, raw                                                                                                              |
| F29      | Orange, mandarin, grapefruit                    | Oranges,...<br>Mandarin, ....<br>Grapefruit, ....                                                       | Mandarin<br>Grapefruit<br>Orange                                                                                                                                                     |
| F30      | Banana                                          | Bananas                                                                                                 | Banana, cavendish, peeled, raw                                                                                                                                                       |
| FS1      | Peach, nectarine, plum or apricot               | Apricot<br>Nectarine<br>Peach<br>Plum                                                                   | Apricot, fresh, raw<br>Nectarine, unpeeled, raw<br>Peach, fresh, raw<br>Plum                                                                                                         |
| FS2      | Mango or paw-paw                                | Mango, peeled<br>Pawpaw                                                                                 | Mango, peeled<br>Pawpaw                                                                                                                                                              |
| FS3      | Pineapple                                       | Pineapples                                                                                              | Pineapple, fresh                                                                                                                                                                     |
| FS4      | Grapes, strawberries, blueberries               | Grapes, ....<br>Berries, mixed<br>Blueberry, ...<br>Mulberry, ...<br>Strawberry, ...<br>Raspberry, .... | Berries, mixed -strawberry, raspberry, blueberry, blackberry-, fresh, raw<br>Blueberry, fresh<br>Boysenberry, fresh<br>Grape, raw<br>Mulberry, fresh, raw<br>Raspberry<br>Strawberry |
| FS5      | Melon eg. watermelon, rockmelon, honeydew melon | Melon, ...                                                                                              | Melon                                                                                                                                                                                |

**Table S2: Percentage Consumption of Selected Foods in Children aged 2-4 years and 5-8 years**

| ACAES FFQ Item          |                                                                                      | 2 – 4 year old participants |                |                  |                 |                |                   | 5 – 8 year old participants |                |                  |                 |                |                  |
|-------------------------|--------------------------------------------------------------------------------------|-----------------------------|----------------|------------------|-----------------|----------------|-------------------|-----------------------------|----------------|------------------|-----------------|----------------|------------------|
|                         |                                                                                      | NNS (1995)                  |                |                  | ANCNPAS (2007)  |                |                   | NNS (1995)                  |                |                  | ANCNPAS (2007)  |                |                  |
|                         |                                                                                      | Female<br>n=299             | Male<br>n=282  | Persons<br>n=581 | Female<br>n=715 | Male<br>n=776  | Persons<br>n=1491 | Female<br>n=282             | Male<br>n=342  | Persons<br>n=624 | Female<br>n=474 | Male<br>n=481  | Persons<br>n=955 |
| <b>Drinks</b>           |                                                                                      |                             |                |                  |                 |                |                   |                             |                |                  |                 |                |                  |
| D1                      | DIET soft drink<br>eg. Diet coke                                                     | 9<br>(3.0%)                 | 11<br>(3.9%)   | 20<br>(3.4%)     | 18<br>(2.5%)    | 19<br>(2.4%)   | 37<br>(2.5%)      | 22<br>(7.8%)                | 29<br>(8.5%)   | 51<br>(8.2%)     | 21<br>(4.4%)    | 19<br>(4%)     | 40<br>(4.2%)     |
| D2                      | Soft drink (NOT<br>DIET) including<br>flavoured<br>mineral water                     | 68<br>(22.7%)               | 83<br>(29.4%)  | 151<br>(26.0%)   | 76<br>(10.6%)   | 88<br>(11.3%)  | 164<br>(11.0%)    | 94<br>(33.3%)               | 136<br>(39.8%) | 230<br>(36.9%)   | 98<br>(20.4%)   | 107<br>(22.2%) | 205<br>(21.5%)   |
| D3                      | Water -<br>including<br>bottled water.<br>unflavoured<br>mineral water,<br>tap water | 225<br>(75.3%)              | 193<br>(68.4%) | 418<br>(71.9%)   | 681<br>(95.2%)  | 723<br>(93.2%) | 1404<br>(94.2%)   | 269<br>(95.3%)              | 281<br>(82.2%) | 550<br>(88.1%)   | 458<br>(95.2%)  | 455<br>(94.6%) | 913<br>(95.6%)   |
| D4                      | Fruit juice-<br>based drinks                                                         | 110<br>(36.8%)              | 103<br>(36.5%) | 213<br>(36.7%)   | 337<br>(47.1%)  | 353<br>(45.5%) | 690<br>(46.3%)    | 96<br>(34.0%)               | 111<br>(32.5%) | 207<br>(33.2%)   | 211<br>(43.9%)  | 241<br>(50.1%) | 452<br>(47.3%)   |
| D5                      | Cordial or<br>'make up'                                                              | 182<br>(60.9%)              | 148<br>(52.5%) | 330<br>(56.8%)   | 126<br>(17.6%)  | 178<br>(22.9%) | 304<br>(20.4%)    | 218<br>(77.3%)              | 190<br>(55.6%) | 408<br>(65.4%)   | 102<br>(21.2%)  | 99<br>(20.6%)  | 201<br>(21.0%)   |
| D6                      | Tea or Coffee                                                                        | 18<br>(6.0%)                | 18<br>(6.4%)   | 36<br>(6.2%)     | 21<br>(2.9%)    | 28<br>(3.6%)   | 49<br>(3.3%)      | 27<br>(9.6%)                | 22<br>(6.4%)   | 49<br>(7.9%)     | 29<br>(6%)      | 31<br>(6.4%)   | 60<br>(6.3%)     |
| D7                      | Beer                                                                                 | 2<br>(0.7%)                 | 2<br>(0.7%)    | 4<br>(0.7%)      | 0               | 0              | 0                 | 1<br>(0.4%)                 | 0<br>(0%)      | 1<br>(0.2%)      | 0<br>(0%)       | 0<br>(0%)      | 0<br>(0%)        |
| D8                      | Wine or wine<br>coolers                                                              | 0<br>(0%)                   | 1<br>(0.4%)    | 1<br>(0.2%)      | 7<br>(1%)       | 8<br>(1%)      | 15<br>(1%)        | 0<br>(0%)                   | 0<br>(0%)      | 0<br>(0%)        | 1<br>(0.2%)     | 2<br>(0.4%)    | 3<br>(0.3%)      |
| D9                      | Spirits                                                                              | 0<br>(0%)                   | 0<br>(0%)      | 0<br>(0%)        | 0<br>(0%)       | 0<br>(0%)      | 0<br>(0%)         | 0<br>(0%)                   | 0<br>(0%)      | 0<br>(0%)        | 0<br>(0%)       | 0<br>(0%)      | 0<br>(0%)        |
| <b>Dairy<br/>foods:</b> |                                                                                      |                             |                |                  |                 |                |                   |                             |                |                  |                 |                |                  |
| DF1 +<br>DF3            | Soy Milk                                                                             | 4<br>(1.3%)                 | 14<br>(5.0%)   | 18<br>(3.1%)     | 26<br>(3.6%)    | 29<br>(3.7%)   | 55<br>(3.7%)      | 6<br>(2.1%)                 | 5<br>(1.5%)    | 11<br>(1.8%)     | 9<br>(1.9%)     | 5<br>(1%)      | 14<br>(1.5%)     |

**Table S2: Percentage Consumption of Selected Foods in Children aged 2-4 years and 5-8 years (cont)**

| ACAES FFQ Item            | 2 – 4 year old participants                                 |                |                  |                 |                |                   | 5 – 8 year old participants |                |                  |                 |                |                  |                |
|---------------------------|-------------------------------------------------------------|----------------|------------------|-----------------|----------------|-------------------|-----------------------------|----------------|------------------|-----------------|----------------|------------------|----------------|
|                           | NNS (1995)                                                  |                |                  | ANCPAS (2007)   |                |                   | NNS (1995)                  |                |                  | ANCPAS (2007)   |                |                  |                |
|                           | Female<br>n=299                                             | Male<br>n=282  | Persons<br>n=581 | Female<br>n=715 | Male<br>n=776  | Persons<br>n=1491 | Female<br>n=282             | Male<br>n=342  | Persons<br>n=624 | Female<br>n=474 | Male<br>n=481  | Persons<br>n=955 |                |
| DF1 + DF3                 | Whole Milk                                                  | 230<br>(76.9%) | 206<br>(73.0%)   | 436<br>(75.0%)  | 480<br>(67.1%) | 549<br>(70.7%)    | 1029<br>(69.0%)             | 198<br>(70.2%) | 240<br>(70.2%)   | 438<br>(70.2%)  | 236<br>(49.8%) | 270<br>(56.1%)   | 506<br>(53.0%) |
| DF1 + DF3                 | Reduced Fat Milk                                            | 30<br>(10.0%)  | 23<br>(8.2%)     | 53<br>(9.1%)    | 123<br>(17.2%) | 128<br>(16.5%)    | 251<br>(16.8%)              | 55<br>(19.5%)  | 41<br>(12.0%)    | 96<br>(15.4%)   | 95<br>(20%)    | 102<br>(21.2%)   | 197<br>(20.6%) |
| DF1 + DF3                 | Skim Milk                                                   | 2<br>(0.7%)    | 6<br>(2.1%)      | 8<br>(1.4%)     | 23<br>(3.2%)   | 19<br>(2.4%)      | 42<br>(2.8%)                | 6<br>(2.1%)    | 6<br>(1.8%)      | 12<br>(1.9%)    | 23<br>(4.9%)   | 23<br>(4.8%)     | 46<br>(4.8%)   |
| DF2                       | Flavoured milk                                              | 24<br>(8.0%)   | 15<br>(5.3%)     | 39<br>(6.7%)    | 55<br>(7.7%)   | 75<br>(9.7%)      | 130<br>(8.7%)               | 23<br>(8.2%)   | 42<br>(12.3%)    | 65<br>(10.4%)   | 69<br>(14.6%)  | 55<br>(11.4%)    | 124<br>(13.0%) |
| DF4                       | Cream or sour cream                                         | 14<br>(4.7%)   | 6<br>(2.1%)      | 20<br>(3.4%)    | 25<br>(3.5%)   | 24<br>(3.1%)      | 49<br>(3.3%)                | 13<br>(4.6%)   | 9<br>(2.6%)      | 22<br>(3.5%)    | 21<br>(4.4%)   | 25<br>(5.2%)     | 46<br>(4.8%)   |
| DF5                       | Ice cream                                                   | 55<br>(18.4%)  | 47<br>(16.7%)    | 102<br>(17.6%)  | 120<br>(16.8%) | 107<br>(13.8%)    | 227<br>(15.2%)              | 65<br>(23.0%)  | 73<br>(21.3%)    | 138<br>(22.1%)  | 117<br>(24.7%) | 101<br>(20.1%)   | 218<br>(22.8%) |
| DF6                       | Frozen yoghurt                                              | 1<br>(0.3%)    | 1<br>(0.4%)      | 2<br>(0.3%)     | 8<br>(1.1%)    | 3<br>(0.4%)       | 11<br>(0.7%)                | 3<br>(1.1%)    | 0<br>(0%)        | 3<br>(0.5%)     | 6<br>(1.3%)    | 5<br>(1%)        | 11<br>(1.2%)   |
| DF7                       | Yoghurt (not frozen) plain or flavoured                     | 33<br>(11.0%)  | 38<br>(13.5%)    | 71<br>(12.2%)   | 256<br>(35.8%) | 272<br>(35.1%)    | 528<br>(35.4%)              | 28<br>(9.9%)   | 20<br>(5.8%)     | 48<br>(7.7%)    | 96<br>(20.3%)  | 105<br>(21.8%)   | 201<br>(21.0%) |
| DF8                       | Cottage cheese or ricotta                                   | 0<br>(0%)      | 0<br>(0%)        | 0<br>(0%)       | 4<br>(0.6%)    | 4<br>(0.5%)       | 8<br>(0.5%)                 | 2<br>(0.7%)    | 1<br>(0.3%)      | 3<br>(0.5%)     | 0<br>(0%)      | 3<br>(0.6%)      | 3<br>(0.3%)    |
| DF9                       | Cheese including cheese on sandwiches, biscuits or on toast | 97<br>(32.4%)  | 99<br>(35.1%)    | 196<br>(33.7%)  | 343<br>(48%)   | 371<br>(47.8%)    | 714<br>(47.9%)              | 114<br>(40.4%) | 112<br>(32.7%)   | 226<br>(36.2%)  | 177<br>(37.3%) | 198<br>(41.2%)   | 375<br>(39.3%) |
| DF10                      | Cheese spread, cream cheese                                 | 28<br>(9.4%)   | 21<br>(7.4%)     | 49<br>(8.4%)    | 43<br>(6%)     | 42<br>(5.4%)      | 85<br>(5.7%)                | 23<br>(8.2%)   | 28<br>(8.2%)     | 51<br>(8.2%)    | 24<br>(5.1%)   | 15<br>(3.1%)     | 39<br>(4.1%)   |
| <b>Breads and Cereal:</b> |                                                             |                |                  |                 |                |                   |                             |                |                  |                 |                |                  |                |

**Table S2: Percentage Consumption of Selected Foods in Children aged 2-4 years and 5-8 years (cont)**

| ACAES FFQ Item            |                                       | 2 – 4 year old participants |                |                  |                 |                |                   | 5 – 8 year old participants |                |                  |                 |                |                  |
|---------------------------|---------------------------------------|-----------------------------|----------------|------------------|-----------------|----------------|-------------------|-----------------------------|----------------|------------------|-----------------|----------------|------------------|
|                           |                                       | NNS (1995)                  |                |                  | ANCPAS (2007)   |                |                   | NNS (1995)                  |                |                  | ANCPAS (2007)   |                |                  |
|                           |                                       | Female<br>n=299             | Male<br>n=282  | Persons<br>n=581 | Female<br>n=715 | Male<br>n=776  | Persons<br>n=1491 | Female<br>n=282             | Male<br>n=342  | Persons<br>n=624 | Female<br>n=474 | Male<br>n=481  | Persons<br>n=955 |
| B1                        | Muesli                                | 4<br>(1.3%)                 | 6<br>(2.1%)    | 10<br>(1.7%)     | 12<br>(1.7%)    | 13<br>(1.7%)   | 25<br>(1.7%)      | 7<br>(2.5%)                 | 8<br>(2.3%)    | 15<br>(2.4%)     | 4<br>(0.8%)     | 3<br>(0.6%)    | 7<br>(0.7%)      |
| B2                        | Cooked porridge                       | 14<br>(4.7%)                | 9<br>(3.2%)    | 23<br>(4.0%)     | 55<br>(7.7%)    | 55<br>(7.1%)   | 110<br>(7.4%)     | 10<br>(3.5%)                | 13<br>(3.8%)   | 23<br>(3.7%)     | 29<br>(6.1%)    | 16<br>(3.3%)   | 45<br>(4.7%)     |
| B3                        | Breakfast cereal                      | 190<br>(63.5%)              | 177<br>(62.8%) | 367<br>(63.2%)   | 418<br>(58.5%)  | 462<br>(59.5%) | 880<br>(59%)      | 194<br>(68.8%)              | 208<br>(60.8%) | 402<br>(64.4%)   | 240<br>(50.6%)  | 312<br>(64.9%) | 552<br>(57.8%)   |
| B5                        | Bread, pita bread, roll – White       | 204<br>(68.2%)              | 202<br>(71.6%) | 406<br>(69.9%)   | 336<br>(47%)    | 395<br>(50.9%) | 731<br>(49%)      | 243<br>(86.2%)              | 254<br>(74.3%) | 497<br>(79.6%)   | 271<br>(57.2%)  | 273<br>(56.7%) | 544<br>(57%)     |
| B5                        | Bread, pita bread, roll – Mixed Grain | 22<br>(7.4%)                | 21<br>(7.4%)   | 43<br>(7.4%)     | 84<br>(11.7%)   | 122<br>(15.7%) | 206<br>(13.8%)    | 25<br>(8.9%)                | 23<br>(6.7%)   | 48<br>(7.7%)     | 51<br>(10.8%)   | 45<br>(9.4%)   | 96<br>(10.1%)    |
| B5                        | Bread, pita bread, roll - Wholemeal   | 48<br>(16.1%)               | 42<br>(14.9%)  | 90<br>(15.5%)    | 198<br>(27.7%)  | 179<br>(23.1%) | 377<br>(25.3%)    | 32<br>(11.3%)               | 53<br>(15.5%)  | 85<br>(13.6%)    | 85<br>(17.9%)   | 107<br>(22.2%) | 192<br>(20.1%)   |
| B6                        | English muffin, bagel or crumpet      | 6<br>(2.0%)                 | 10<br>(3.5%)   | 16<br>(2.8%)     | 34<br>(4.8%)    | 32<br>(4.1%)   | 66<br>(4.4%)      | 9<br>(31.9%)                | 15<br>(4.4%)   | 24<br>(3.8%)     | 18<br>(3.8%)    | 17<br>(3.5%)   | 35<br>(3.7%)     |
| B7                        | Rice                                  | 32<br>(10.7%)               | 29<br>(10.3%)  | 61<br>(10.5%)    | 112<br>(15.7%)  | 115<br>(14.8%) | 227<br>(15.2%)    | 27<br>(9.6%)                | 40<br>(11.7%)  | 67<br>(10.7%)    | 68<br>(14.3%)   | 59<br>(12.3%)  | 127<br>(13.3%)   |
| B8                        | Other grains eg. cous cous, burghul   | 0<br>(0%)                   | 0<br>(0%)      | 0<br>(0%)        | 7<br>(1%)       | 5<br>(0.6%)    | 12<br>(0.8%)      | 1<br>(0.4%)                 | 1<br>(0.3%)    | 2<br>(0.3%)      | 2<br>(0.4%)     | 1<br>(0.2%)    | 3<br>(0.3%)      |
| B9                        | Noodles                               | 17<br>(5.7%)                | 16<br>(5.7%)   | 33<br>(5.7%)     | 9<br>(1.3%)     | 19<br>(2.4%)   | 28<br>(1.9%)      | 17<br>(6.0%)                | 19<br>(5.6%)   | 36<br>(5.8%)     | 7<br>(1.5%)     | 9<br>(1.9%)    | 16<br>(1.7%)     |
| B10                       | Pasta                                 | 35<br>(11.7%)               | 39<br>(13.8%)  | 74<br>(12.7%)    | 208<br>(29.1%)  | 232<br>(29.9%) | 440<br>(29.5%)    | 43<br>(15.2%)               | 28<br>(8.2%)   | 71<br>(11.4%)    | 94<br>(19.8%)   | 122<br>(25.4%) | 216<br>(22.6%)   |
| <b>Sweets and Snacks:</b> |                                       |                             |                |                  |                 |                |                   |                             |                |                  |                 |                |                  |

**Table S2: Percentage Consumption of Selected Foods in Children aged 2-4 years and 5-8 years (cont)**

| ACAES FFQ Item |                                                             | 2 – 4 year old participants |               |                  |                 |                |                   | 5 – 8 year old participants |               |                  |                 |                |                  |
|----------------|-------------------------------------------------------------|-----------------------------|---------------|------------------|-----------------|----------------|-------------------|-----------------------------|---------------|------------------|-----------------|----------------|------------------|
|                |                                                             | NNS (1995)                  |               |                  | ANCPAS (2007)   |                |                   | NNS (1995)                  |               |                  | ANCPAS (2007)   |                |                  |
|                |                                                             | Female<br>n=299             | Male<br>n=282 | Persons<br>n=581 | Female<br>n=715 | Male<br>n=776  | Persons<br>n=1491 | Female<br>n=282             | Male<br>n=342 | Persons<br>n=624 | Female<br>n=474 | Male<br>n=481  | Persons<br>n=955 |
| S1             | Cakes, sweet muffins, scones, pikelets, pancakes, hot cakes | 71<br>(23.7%)               | 51<br>(18.1%) | 122<br>(21.0%)   | 170<br>(23.8%)  | 193<br>(24.9%) | 363<br>(24.3%)    | 76<br>(27.0%)               | 96<br>(28.1%) | 172<br>(27.6%)   | 145<br>(30.6%)  | 123<br>(25.6%) | 268<br>(28.1%)   |
| S2             | Sweet pies or sweet pastries                                | 9<br>(3.0%)                 | 15<br>(5.3%)  | 24<br>(4.1%)     | 31<br>(4.3%)    | 38<br>(4.9%)   | 69<br>(4.6%)      | 28<br>(9.9%)                | 22<br>(6.4%)  | 50<br>(8.0%)     | 25<br>(5.3%)    | 28<br>(5.8%)   | 53<br>(5.5%)     |
| S3             | Other puddings or desserts (not ice cream)                  | 51<br>(17.1%)               | 39<br>(13.8%) | 90<br>(15.5%)    | 60<br>(8.4%)    | 78<br>(10.1%)  | 138<br>(9.3%)     | 34<br>(12.1%)               | 41<br>(12.0%) | 75<br>(12.0%)    | 39<br>(8.2%)    | 37<br>(7.7%)   | 76<br>(8%)       |
| S4             | Plain sweet biscuits                                        | 67<br>(22.4%)               | 70<br>(24.8%) | 137<br>(23.6%)   | 161<br>(22.5%)  | 155<br>(20%)   | 316<br>(21.2%)    | 71<br>(25.2%)               | 91<br>(26.6%) | 162<br>(30.0%)   | 93<br>(19.6%)   | 88<br>(18.3%)  | 181<br>(19%)     |
| S5             | Cream or chocolate biscuits                                 | 44<br>(14.7%)               | 37<br>(13.1%) | 81<br>(13.9%)    | 75<br>(10.5%)   | 95<br>(12.2%)  | 170<br>(11.4%)    | 68<br>(24.1%)               | 55<br>(16.1%) | 123<br>(19.7%)   | 65<br>(13.7%)   | 71<br>(14.8%)  | 136<br>(14.2%)   |
| S6             | Dry or savoury biscuits, crispbread, crackers               | 76<br>(25.4%)               | 58<br>(20.6%) | 134<br>(23.1%)   | 269<br>(37.6%)  | 268<br>(34.5%) | 537<br>(36%)      | 82<br>(29.7%)               | 85<br>(24.9%) | 167<br>(26.8%)   | 149<br>(31.4%)  | 139<br>(28.9%) | 288<br>(30.2%)   |
| S7             | Savoury combination snacks                                  | -                           | -             | -                | 21<br>(2.9%)    | 22<br>(2.8%)   | 43<br>(2.9%)      | -                           | -             | -                | 25<br>(5.3%)    | 27<br>(5.6%)   | 52<br>(5.4%)     |
| S8             | Sweet combination snacks                                    | -                           | -             | -                | -               | -              | -                 | -                           | -             | -                | -               | -              | -                |
| S9             | Snack noodles                                               | 1<br>(0.3%)                 | 0<br>(0%)     | 1<br>(0.2%)      | 29<br>(4.1%)    | 25<br>(3.2%)   | 54<br>(3.6%)      | 1<br>(0.4%)                 | 0<br>(0%)     | 1<br>(0.2%)      | 33<br>(7%)      | 31<br>(6.4%)   | 64<br>(6.7%)     |
| S10            | Fruit bars                                                  | 26<br>(8.7%)                | 21<br>(7.4%)  | 47<br>(8.1%)     | 0<br>(0%)       | 0<br>(0%)      | 0<br>(0%)         | 32<br>(11.3%)               | 32<br>(9.4%)  | 64<br>(10.3%)    | 0<br>(0%)       | 0<br>(0%)      | 0<br>(0%)        |



**Table S2: Percentage Consumption of Selected Foods in Children aged 2-4 years and 5-8 years (cont)**

| ACAES FFQ Item        |                                                       | 2 – 4 year old participants |               |                  |                 |                |                   | 5 – 8 year old participants |               |                  |                 |               |                  |
|-----------------------|-------------------------------------------------------|-----------------------------|---------------|------------------|-----------------|----------------|-------------------|-----------------------------|---------------|------------------|-----------------|---------------|------------------|
|                       |                                                       | NNS (1995)                  |               |                  | ANCPAS (2007)   |                |                   | NNS (1995)                  |               |                  | ANCPAS (2007)   |               |                  |
|                       |                                                       | Female<br>n=299             | Male<br>n=282 | Persons<br>n=581 | Female<br>n=715 | Male<br>n=776  | Persons<br>n=1491 | Female<br>n=282             | Male<br>n=342 | Persons<br>n=624 | Female<br>n=474 | Male<br>n=481 | Persons<br>n=955 |
| S11                   | Snack bars                                            | -                           | -             | -                | 42<br>(5.9%)    | 46<br>(5.9%)   | 88<br>(5.9%)      | -                           | -             | -                | 27<br>(5.7%)    | 39<br>(8.1%)  | 66<br>(6.9%)     |
| S12                   | Muesli bars                                           | 20<br>(6.7%)                | 32<br>(11.3%) | 52<br>(9.0%)     | 56<br>(7.8%)    | 59<br>(7.6%)   | 115<br>(7.7%)     | 44<br>(15.6%)               | 39<br>(11.4%) | 83<br>(13.3%)    | 54<br>(11.4%)   | 63<br>(13.1%) | 117<br>(12.3%)   |
| <b>Main Meals:</b>    |                                                       |                             |               |                  |                 |                |                   |                             |               |                  |                 |               |                  |
| M1                    | Mince dish                                            | 17<br>(5.7%)                | 23<br>(8.2%)  | 40<br>(6.9%)     | 121<br>(16.9%)  | 120<br>(15.5%) | 241<br>(16.2%)    | 33<br>(11.7%)               | 36<br>(10.5%) | 69<br>(11.1%)    | 53<br>(11.2%)   | 79<br>(16.4%) | 132<br>(13.8%)   |
| M2-3,<br>5 M11-<br>12 | Mixed meat dish                                       | 31<br>(10.3%)               | 30<br>(10.6%) | 61<br>(10.5%)    | 12<br>(1.7%)    | 20<br>(2.5%)   | 32<br>(2.2%)      | 35<br>(12.4%)               | 35<br>(10.2%) | 70<br>(11.2%)    | 6<br>(1.3%)     | 6<br>(1.2%)   | 12<br>(1.2%)     |
| M4                    | Plain meat (beef or lamb) WITHOUT vegetables or salad | 44<br>(14.7%)               | 46<br>(16.3%) | 90<br>(15.5%)    | 116<br>(16.2%)  | 123<br>(15.9%) | 239<br>(16%)      | 65<br>(23.0%)               | 56<br>(16.4%) | 121<br>(19.4%)   | 65<br>(13.7%)   | 79<br>(16.4%) | 144<br>(15.1%)   |
| M6-7,<br>M10          | Mixed chicken dish                                    | 15<br>(5.0%)                | 15<br>(5.3%)  | 30<br>(5.2%)     | 29<br>(4.0%)    | 26<br>(3.4%)   | 55<br>(3.7%)      | 11<br>(3.9%)                | 8<br>(2.3%)   | 19<br>(3.0%)     | 17<br>(3.6%)    | 16<br>(3.3%)  | 33<br>(3.5%)     |
| M8                    | Chicken crumbed                                       | 18<br>(6.0%)                | 13<br>(4.6%)  | 31<br>(5.3%)     | 69<br>(9.7%)    | 49<br>(6.3%)   | 118<br>(7.9%)     | 27<br>(9.6%)                | 35<br>(10.2%) | 62<br>(9.9%)     | 57<br>(12%)     | 51<br>(10.6%) | 108<br>(11.3%)   |
| M9                    | Plain chicken WITHOUT vegetables                      | 26<br>(8.7%)                | 26<br>(9.2%)  | 62<br>(10.7%)    | 115<br>(16.1%)  | 131<br>(16.9%) | 246<br>(16.5%)    | 39<br>(13.8%)               | 53<br>(15.5%) | 92<br>(14.7%)    | 78<br>(16.5%)   | 81<br>(16.8%) | 159<br>(16.6%)   |
| M13                   | Plain pork WITHOUT vegetables                         | 8<br>(2.7%)                 | 8<br>(2.8%)   | 16<br>(2.8%)     | 15<br>(2.1%)    | 21<br>(2.7%)   | 36<br>(2.4%)      | 8<br>(2.8%)                 | 15<br>(4.4%)  | 23<br>(3.7%)     | 12<br>(2.5%)    | 14<br>(2.9%)  | 26<br>(2.7%)     |
| M15                   | Liver – beef, calf, chicken                           | 1<br>(0.3%)                 | 2<br>(0.7%)   | 3<br>(0.5%)      | 0<br>(0%)       | 0<br>(0%)      | 0<br>(0%)         | 1<br>(0.4%)                 | 1<br>(0.3%)   | 2<br>(0.3%)      | 2<br>(0.4%)     | 1<br>(0.2%)   | 3<br>(0.3%)      |

**Table S2: Percentage Consumption of Selected Foods in Children aged 2-4 years and 5-8 years (cont)**

| ACAES FFQ Item      |                                                 | 2 – 4 year old participants |               |                  |                 |                |                   | 5 – 8 year old participants |               |                  |                 |               |                  |
|---------------------|-------------------------------------------------|-----------------------------|---------------|------------------|-----------------|----------------|-------------------|-----------------------------|---------------|------------------|-----------------|---------------|------------------|
|                     |                                                 | NNS (1995)                  |               |                  | ANCPAS (2007)   |                |                   | NNS (1995)                  |               |                  | ANCPAS (2007)   |               |                  |
|                     |                                                 | Female<br>n=299             | Male<br>n=282 | Persons<br>n=581 | Female<br>n=715 | Male<br>n=776  | Persons<br>n=1491 | Female<br>n=282             | Male<br>n=342 | Persons<br>n=624 | Female<br>n=474 | Male<br>n=481 | Persons<br>n=955 |
| M16-17              | Fish                                            | 27<br>(9.0%)                | 13<br>(4.6%)  | 40<br>(6.9%)     | 61<br>(8.5%)    | 60<br>(7.7%)   | 121<br>(8.1%)     | 26<br>(9.2%)                | 16<br>(4.7%)  | 42<br>(6.7%)     | 41<br>(8.6%)    | 29<br>(6%)    | 70<br>(7.3%)     |
| M18                 | Canned tuna, salmon, sardines including patties | 4<br>(1.3%)                 | 5<br>(1.8%)   | 9<br>(1.5%)      | 25<br>(3.5%)    | 29<br>(3.7%)   | 54<br>(3.6%)      | 13<br>(4.6%)                | 5<br>(1.5%)   | 18<br>(2.9%)     | 19<br>(4%)      | 17<br>(3.5%)  | 36<br>(3.8%)     |
| M19                 | Other seafood                                   | 7<br>(2.3%)                 | 1<br>(0.4%)   | 8<br>(1.4%)      | 9<br>(1.3%)     | 14<br>(1.8%)   | 23<br>(1.5%)      | 4<br>(1.4%)                 | 12<br>(3.5%)  | 16<br>(2.6%)     | 10<br>(2.1%)    | 14<br>(2.9%)  | 24<br>(2.5%)     |
| M20-21              | Creamy or Clear soup                            | 17<br>(5.7%)                | 19<br>(6.7%)  | 36<br>(6.2%)     | 49<br>(6.9%)    | 55<br>(7.1%)   | 104<br>(7%)       | 16<br>(5.7%)                | 31<br>(9.1%)  | 47<br>(7.5%)     | 34<br>(7.2%)    | 29<br>(6%)    | 63<br>(6.6%)     |
| M22                 | Tacos, burritos, enchiladas                     | 0<br>(0%)                   | 1<br>(0.4%)   | 1<br>(0.2%)      | 7<br>(1%)       | 7<br>(0.9%)    | 14<br>(0.9%)      | 0<br>(0%)                   | 0<br>(0%)     | 0<br>(0%)        | 10<br>(2.1%)    | 12<br>(2.5%)  | 22<br>(2.3%)     |
| M23                 | Sausages, frankfurts, Pluto Pup                 | 48<br>(16.1%)               | 41<br>(14.5%) | 89<br>(15.3%)    | 89<br>(12.4%)   | 104<br>(13.4%) | 193<br>(12.9%)    | 50<br>(17.7%)               | 51<br>(14.9%) | 101<br>(16.2%)   | 59<br>(12.4%)   | 69<br>(14.3%) | 128<br>(13.4%)   |
| M24                 | Hamburger - all types                           | 16<br>(5.4%)                | 21<br>(7.4%)  | 37<br>(6.4%)     | 7<br>(1%)       | 11<br>(1.4%)   | 18<br>(1.2%)      | 8<br>(2.8%)                 | 25<br>(7.3%)  | 33<br>(5.3%)     | 15<br>(3.2%)    | 23<br>(4.8%)  | 38<br>(4.0%)     |
| M25                 | Pizza                                           | 19<br>(6.4%)                | 13<br>(4.6%)  | 32<br>(5.5%)     | 27<br>(3.8%)    | 33<br>(4.3%)   | 60<br>(4.0%)      | 22<br>(7.8%)                | 39<br>(11.4%) | 61<br>(9.8%)     | 34<br>(7.2%)    | 29<br>(6%)    | 63<br>(6.6%)     |
| M26                 | Pie, sausage roll, chiko roll                   | 34<br>(11.4%)               | 18<br>(6.4%)  | 52<br>(9.0%)     | 28<br>(3.9%)    | 53<br>(6.8%)   | 81<br>(5.4%)      | 37<br>(13.1%)               | 38<br>(11.1%) | 75<br>(12.0%)    | 54<br>(11.4%)   | 42<br>(8.7%)  | 96<br>(10.1%)    |
| M27                 | Hot dog                                         | 1<br>(0.3%)                 | 1<br>(0.4%)   | 2<br>(0.3%)      | -               | -              | -                 | 0<br>(0%)                   | 0<br>(0%)     | 0<br>(0%)        | -               | -             | -                |
| M28                 | Savoury pastries                                | 6<br>(2.0%)                 | 4<br>(1.4%)   | 10<br>(1.7%)     | 13<br>(1.8%)    | 24<br>(3.1%)   | 37<br>(2.5%)      | 6<br>(2.1%)                 | 18<br>(5.3%)  | 24<br>(3.8%)     | 12<br>(2.5%)    | 13<br>(2.7%)  | 25<br>(2.6%)     |
| M29                 | Hash browns, potato scallops                    | 10<br>(3.3%)                | 7<br>(2.5%)   | 17<br>(2.9%)     | 7<br>(1%)       | 11<br>(1.4%)   | 18<br>(1.2%)      | 9<br>(3.2%)                 | 8<br>(2.3%)   | 17<br>(2.7%)     | 9<br>(1.9%)     | 14<br>(2.9%)  | 23<br>(2.4%)     |
| <b>Other Foods:</b> |                                                 |                             |               |                  |                 |                |                   |                             |               |                  |                 |               |                  |

**Table S2: Percentage Consumption of Selected Foods in Children aged 2-4 years and 5-8 years (cont)**

| ACAES FFQ Item |                                            | 2 – 4 year old participants |               |                  |                 |                |                   | 5 – 8 year old participants |                |                  |                 |                |                  |
|----------------|--------------------------------------------|-----------------------------|---------------|------------------|-----------------|----------------|-------------------|-----------------------------|----------------|------------------|-----------------|----------------|------------------|
|                |                                            | NNS (1995)                  |               |                  | ANCNPAS (2007)  |                |                   | NNS (1995)                  |                |                  | ANCNPAS (2007)  |                |                  |
|                |                                            | Female<br>n=299             | Male<br>n=282 | Persons<br>n=581 | Female<br>n=715 | Male<br>n=776  | Persons<br>n=1491 | Female<br>n=282             | Male<br>n=342  | Persons<br>n=624 | Female<br>n=474 | Male<br>n=481  | Persons<br>n=955 |
| O1             | Chips (not potato)                         | 31<br>(10.4%)               | 38<br>(13.5%) | 69<br>(11.9%)    | 61<br>(8.5%)    | 75<br>(9.7%)   | 136<br>(9.1%)     | 53<br>(18.8%)               | 55<br>(16.1%)  | 108<br>(17.3%)   | 47<br>(9.9%)    | 65<br>(13.5%)  | 112<br>(11.7%)   |
| O2             | Potato chips or crisps                     | 29<br>(9.7%)                | 57<br>(20.2%) | 86<br>(14.8%)    | 69<br>(9.7%)    | 70<br>(9%)     | 139<br>(9.3%)     | 80<br>(28.4%)               | 72<br>(21.1%)  | 152<br>(24.4%)   | 85<br>(17.9%)   | 97<br>(20.2%)  | 182<br>(19.1%)   |
| O3             | Ice block – creamy                         | 13<br>(4.3%)                | 23<br>(8.2%)  | 36<br>(6.2%)     | 21<br>(2.9%)    | 26<br>(3.4%)   | 47<br>(3.2%)      | 32<br>(11.3%)               | 39<br>(11.4%)  | 71<br>(11.4%)    | 23<br>(4.9%)    | 23<br>(4.8%)   | 46<br>(4.8%)     |
| O4             | Ice block – water                          | 32<br>(10.7%)               | 29<br>(10.3%) | 61<br>(10.5%)    | 28<br>(3.9%)    | 36<br>(4.6%)   | 64<br>(4.3%)      | 37<br>(13.1%)               | 45<br>(13.2%)  | 82<br>(13.1%)    | 40<br>(8.4%)    | 35<br>(7.3%)   | 75<br>(7.9%)     |
| O5             | Chocolate                                  | 78<br>(26.1%)               | 73<br>(25.9%) | 151<br>(26.0%)   | 142<br>(19.9%)  | 145<br>(18.7%) | 287<br>(19.2%)    | 99<br>(35.1%)               | 108<br>(31.6%) | 207<br>(33.2%)   | 130<br>(27.4%)  | 128<br>(26.6%) | 258<br>(27.0%)   |
| O6             | Lollies without chocolate                  | 61<br>(20.4%)               | 56<br>(19.9%) | 117<br>(20.1%)   | 114<br>(15.9%)  | 104<br>(13.4%) | 218<br>(14.6%)    | 80<br>(28.4%)               | 77<br>(22.5%)  | 157<br>(25.2%)   | 111<br>(23.4%)  | 103<br>(21.4%) | 214<br>(22.4%)   |
| O7             | Low fat salad dressing or mayonnaise       | 0<br>(0%)                   | 2<br>(0.7%)   | 2<br>(0.3%)      | 11<br>(1.5%)    | 10<br>(1.3%)   | 21<br>(1.4%)      | 3<br>(1.1%)                 | 9<br>(2.6%)    | 12<br>(1.9%)     | 5<br>(1.1%)     | 11<br>(2.3%)   | 16<br>(1.7%)     |
| O8             | Salad dressing or mayonnaise - not low fat | 15<br>(5.0%)                | 11<br>(3.9%)  | 26<br>(4.5%)     | 34<br>(4.8%)    | 24<br>(3.1%)   | 58<br>(3.9%)      | 26<br>(9.2%)                | 18<br>(5.3%)   | 44<br>(7.1%)     | 21<br>(4.4%)    | 24<br>(5%)     | 45<br>(4.7%)     |
| O9             | Nuts                                       | 9<br>(3.0%)                 | 7<br>(2.5%)   | 16<br>(2.8%)     | 34<br>(4.8%)    | 24<br>(3.1%)   | 58<br>(3.9%)      | 14<br>(5.0%)                | 13<br>(3.8%)   | 27<br>(4.3%)     | 18<br>(3.8%)    | 17<br>(3.5%)   | 35<br>(3.7%)     |
| O10            | Jam, honey, golden syrup, marmalade        | 44<br>(14.7%)               | 41<br>(14.5%) | 85<br>(14.6%)    | 180<br>(25.2%)  | 211<br>(27.2%) | 391<br>(26.2%)    | 45<br>(16.0%)               | 62<br>(18.1%)  | 107<br>(17.1%)   | 104<br>(21.9%)  | 102<br>(21.2%) | 206<br>(21.6%)   |
| O11            | Peanut butter, Nutella                     | 68<br>(22.7%)               | 72<br>(25.5%) | 140<br>(24.1%)   | 97<br>(13.6%)   | 105<br>(13.5%) | 202<br>(13.5%)    | 69<br>(24.5%)               | 81<br>(23.7%)  | 150<br>(24.0%)   | 76<br>(16%)     | 78<br>(16.2%)  | 154<br>(16.1%)   |
| O12            | Vegemite, Mighty Mite, Promite, Marmite    | -                           | -             | -                | 214<br>(30%)    | 278<br>(35.8%) | 492<br>(33%)      | -                           | -              | -                | 124<br>(26.2%)  | 112<br>(23.3%) | 236<br>(24.7%)   |

**Table S2: Percentage Consumption of Selected Foods in Children aged 2-4 years and 5-8 years (cont)**

| ACAES FFQ Item              |                                                | 2 – 4 year old participants |               |                  |                 |                |                   | 5 – 8 year old participants |                |                  |                 |                |                  |
|-----------------------------|------------------------------------------------|-----------------------------|---------------|------------------|-----------------|----------------|-------------------|-----------------------------|----------------|------------------|-----------------|----------------|------------------|
|                             |                                                | NNS (1995)                  |               |                  | ANCPAS (2007)   |                |                   | NNS (1995)                  |                |                  | ANCPAS (2007)   |                |                  |
|                             |                                                | Female<br>n=299             | Male<br>n=282 | Persons<br>n=581 | Female<br>n=715 | Male<br>n=776  | Persons<br>n=1491 | Female<br>n=282             | Male<br>n=342  | Persons<br>n=624 | Female<br>n=474 | Male<br>n=481  | Persons<br>n=955 |
| O13                         | Tomato sauce, barbecue sauce                   | 81<br>(27.1%)               | 65<br>(23.0%) | 146<br>(25.1%)   | 134<br>(18.7%)  | 158<br>(20.4%) | 292<br>(19.6%)    | 96<br>(34.0%)               | 113<br>(33.0%) | 209<br>(33.5%)   | 126<br>(26.6%)  | 121<br>(25.2%) | 247<br>(25.8%)   |
| O14                         | Devon, salami                                  | 36<br>(12.0%)               | 28<br>(9.9%)  | 64<br>(11.0%)    | 48<br>(6.7%)    | 57<br>(7.3%)   | 105<br>(7%)       | 30<br>(10.6%)               | 29<br>(8.5%)   | 59<br>(9.5%)     | 55<br>(11.6%)   | 37<br>(7.7%)   | 92<br>(9.6%)     |
| O15                         | Bacon, ham                                     | 40<br>(13.4%)               | 45<br>(16.0%) | 85<br>(14.6%)    | 132<br>(18.5%)  | 148<br>(19.1%) | 280<br>(18.8%)    | 49<br>(17.4%)               | 60<br>(17.5%)  | 109<br>(17.5%)   | 94<br>(19.8%)   | 112<br>(23.3%) | 206<br>(21.5%)   |
| O16                         | Eggs                                           | 37<br>(12.4%)               | 27<br>(9.6%)  | 64<br>(11.0%)    | 103<br>(14.4%)  | 100<br>(12.9%) | 203<br>(13.6%)    | 33<br>(11.7%)               | 44<br>(12.9%)  | 77<br>(12.3%)    | 59<br>(12.4%)   | 65<br>(13.5%)  | 124<br>(13.0%)   |
| O17                         | Jelly                                          | 6<br>(2.0%)                 | 16<br>(5.7%)  | 22<br>(3.8%)     | 17<br>(2.4%)    | 30<br>(3.9%)   | 47<br>(3.2%)      | 10<br>(3.5%)                | 8<br>(2.3%)    | 18<br>(2.9%)     | 20<br>(4.2%)    | 11<br>(2.3%)   | 31<br>(3.2%)     |
| <b>Fruit and Vegetables</b> |                                                |                             |               |                  |                 |                |                   |                             |                |                  |                 |                |                  |
| F1-2                        | Hot chips bought from a shop or cooked at home | 65<br>(21.7%)               | 67<br>(23.8%) | 132<br>(22.7%)   | 112<br>(15.7%)  | 113<br>(14.6%) | 225<br>(15.1%)    | 67<br>(23.8%)               | 87<br>(25.4%)  | 154<br>(24.7%)   | 101<br>(21.3%)  | 96<br>(20%)    | 197<br>(20.6%)   |
| F3                          | Potato boiled, mashed, baked                   | 90<br>(30.1%)               | 78<br>(27.7%) | 168<br>(28.9%)   | 184<br>(25.7%)  | 203<br>(26.2%) | 387<br>(30%)      | 98<br>(34.8%)               | 95<br>(27.8%)  | 193<br>(30.9%)   | 108<br>(22.8%)  | 102<br>(21.2%) | 210<br>(22.0%)   |
| F4                          | Pumpkin                                        | 20<br>(6.7%)                | 25<br>(8.9%)  | 45<br>(7.7%)     | 64<br>(9%)      | 59<br>(7.6%)   | 123<br>(8.2%)     | 26<br>(9.2%)                | 18<br>(5.3%)   | 44<br>(7.1%)     | 25<br>(5.3%)    | 27<br>(5.6%)   | 52<br>(5.4%)     |
| F5                          | Sweet potato                                   | 1<br>(0.3%)                 | 4<br>(1.4%)   | 5<br>(0.9%)      | 37<br>(5.2%)    | 30<br>(3.9%)   | 67<br>(4.5%)      | 1<br>(0.4%)                 | 0<br>(0%)      | 1<br>(0.2%)      | 8<br>(1.7%)     | 12<br>(2.5%)   | 20<br>(2.1%)     |
| F6                          | Cauliflower                                    | 10<br>(3.3%)                | 5<br>(1.8%)   | 15<br>(2.6%)     | 50<br>(7%)      | 41<br>(5.3%)   | 91<br>(6.1%)      | 15<br>(5.3%)                | 11<br>(3.2%)   | 26<br>(4.2%)     | 24<br>(5.1%)    | 27<br>(5.6%)   | 51<br>(5.3%)     |
| F7                          | Green beans                                    | 28<br>(9.4%)                | 18<br>(6.4%)  | 46<br>(7.9%)     | 51<br>(7.1%)    | 59<br>(7.6%)   | 110<br>(7.3%)     | 29<br>(10.3%)               | 24<br>(7.0%)   | 53<br>(8.5%)     | 36<br>(7.6%)    | 27<br>(5.6%)   | 63<br>(6.6%)     |
| F8                          | Spinach                                        | 4<br>(1.3%)                 | 5<br>(1.8%)   | 9<br>(1.5%)      | 22<br>(3.1%)    | 13<br>(1.7%)   | 35<br>(2.3%)      | 6<br>(2.1%)                 | 3<br>(0.9%)    | 9<br>(1.4%)      | 10<br>(2.1%)    | 9<br>(1.9%)    | 19<br>(2.0%)     |
| F9                          | Cabbage or brussel sprouts                     | 5<br>(1.7%)                 | 10<br>(3.5%)  | 15<br>(2.6%)     | 15<br>(2.1%)    | 21<br>(2.7%)   | 36<br>(2.4%)      | 12<br>(4.3%)                | 13<br>(3.8%)   | 25<br>(4.0%)     | 12<br>(2.5%)    | 10<br>(2.1%)   | 22<br>(2.3%)     |

**Table S2: Percentage Consumption of Selected Foods in Children aged 2-4 years and 5-8 years (cont)**

| ACAES FFQ Item |                                        | 2 – 4 year old participants |               |                  |                 |                |                   | 5 – 8 year old participants |               |                  |                 |                |                  |
|----------------|----------------------------------------|-----------------------------|---------------|------------------|-----------------|----------------|-------------------|-----------------------------|---------------|------------------|-----------------|----------------|------------------|
|                |                                        | NNS (1995)                  |               |                  | ANCPAS (2007)   |                |                   | NNS (1995)                  |               |                  | ANCPAS (2007)   |                |                  |
|                |                                        | Female<br>n=299             | Male<br>n=282 | Persons<br>n=581 | Female<br>n=715 | Male<br>n=776  | Persons<br>n=1491 | Female<br>n=282             | Male<br>n=342 | Persons<br>n=624 | Female<br>n=474 | Male<br>n=481  | Persons<br>n=955 |
| F10            | Peas                                   | 47<br>(15.7%)               | 49<br>(17.4%) | 96<br>(16.5%)    | 107<br>(15%)    | 139<br>(17.9%) | 246<br>(16.5%)    | 53<br>(18.8%)               | 43<br>(12.6%) | 96<br>(15.4%)    | 58<br>(12.2%)   | 53<br>(11%)    | 111<br>(11.6%)   |
| F11            | Broccoli                               | 24<br>(8.0%)                | 21<br>(7.4%)  | 45<br>(7.7%)     | 114<br>(15.%)   | 105<br>(13.5%) | 219<br>(14.7%)    | 26<br>(9.2%)                | 27<br>(7.9%)  | 53<br>(8.5%)     | 60<br>(12.7%)   | 66<br>(13.7%)  | 126<br>(13.2%)   |
| F12            | Carrots                                | 88<br>(29.4%)               | 84<br>(29.8%) | 172<br>(29.6%)   | 228<br>(31.9%)  | 268<br>(34.5%) | 496<br>(33.3%)    | 103<br>(36.5%)              | 96<br>(28.1%) | 199<br>(31.9%)   | 153<br>(32.3%)  | 132<br>(27.4%) | 285<br>(29.8%)   |
| F13            | Zucchini,<br>eggplant,<br>squash       | 11<br>(3.7%)                | 7<br>(2.5%)   | 18<br>(3.1%)     | 38<br>(5.3%)    | 49<br>(6.3%)   | 87<br>(5.8%)      | 9<br>(3.2%)                 | 8<br>(2.3%)   | 17<br>(2.7%)     | 16<br>(3.4%)    | 17<br>(3.5%)   | 33<br>(3.5%)     |
| F14            | Capsicum                               | 8<br>(2.7%)                 | 17<br>(6.0%)  | 25<br>(4.3%)     | 39<br>(5.5%)    | 49<br>(6.3%)   | 88<br>(5.9%)      | 21<br>(7.4%)                | 17<br>(5.0%)  | 38<br>(6.1%)     | 35<br>(7.4%)    | 22<br>(4.6%)   | 57<br>(6.0%)     |
| F15            | Corn,<br>sweetcorn,<br>corn on the cob | 30<br>(10.0%)               | 14<br>(5.0%)  | 44<br>(7.6%)     | 104<br>(14.5%)  | 117<br>(15.1%) | 221<br>(14.8%)    | 22<br>(7.8%)                | 28<br>(8.2%)  | 50<br>(8.0%)     | 57<br>(12%)     | 45<br>(9.4%)   | 102<br>(10.7%)   |
| F16            | Mushrooms                              | 15<br>(5.0%)                | 17<br>(6.0%)  | 32<br>(5.5%)     | 38<br>(5.3%)    | 45<br>(5.8%)   | 83<br>(5.6%)      | 11<br>(3.9%)                | 13<br>(3.8%)  | 24<br>(3.8%)     | 17<br>(3.6%)    | 15<br>(3.1%)   | 32<br>(3.4%)     |
| F17            | Tomatoes                               | 42<br>(14.0%)               | 31<br>(11.0%) | 73<br>(12.6%)    | 111<br>(15.5%)  | 102<br>(13.1%) | 213<br>(14.3%)    | 63<br>(22.3%)               | 39<br>(11.4%) | 102<br>(16.3%)   | 64<br>(13.5%)   | 66<br>(13.7%)  | 130<br>(13.6%)   |
| F18            | Lettuce                                | 35<br>(11.7%)               | 27<br>(9.6%)  | 62<br>(10.7%)    | 47<br>(6.6%)    | 31<br>(4%)     | 78<br>(5.2%)      | 61<br>(21.6%)               | 52<br>(15.2%) | 113<br>(18.1%)   | 52<br>(11%)     | 65<br>(13.5%)  | 117<br>(12.3%)   |
| F19            | Celery,<br>cucumber                    | 23<br>(7.7%)                | 26<br>(9.2%)  | 49<br>(8.4%)     | 81<br>(11.3%)   | 74<br>(9.5%)   | 155<br>(10.4%)    | 38<br>(13.5%)               | 30<br>(8.8%)  | 68<br>(10.9%)    | 61<br>(12.9%)   | 57<br>(11.9%)  | 118<br>(12.4%)   |
| F20            | Avocado                                | 1<br>(0.3%)                 | 3<br>(1.1%)   | 4<br>(0.7%)      | 33<br>(4.6%)    | 24<br>(3.1%)   | 57<br>(3.8%)      | 1<br>(0.4%)                 | 0<br>(0%)     | 1<br>(0.2%)      | 12<br>(2.5%)    | 10<br>(2.1%)   | 22<br>(2.3%)     |
| F21            | Onion, spring<br>onion, leek           | 11<br>(3.7%)                | 9<br>(3.2%)   | 20<br>(3.4%)     | 98<br>(13.7%)   | 124<br>(16%)   | 222<br>(14.9%)    | 17<br>(6.0%)                | 33<br>(9.6%)  | 50<br>(8.0%)     | 61<br>(12.9%)   | 60<br>(12.5%)  | 121<br>(12.8%)   |
| F22            | Soybeans, tofu                         | 0<br>(0%)                   | 3<br>(1.1%)   | 3<br>(0.5%)      | 5<br>(0.7%)     | 5<br>(0.6%)    | 10<br>(0.7%)      | 0<br>(0%)                   | 0<br>(0%)     | 0<br>(0%)        | 1<br>(0.2%)     | 1<br>(0.2%)    | 2<br>(0.2%)      |
| F23            | Baked beans                            | 9<br>(3.0%)                 | 12<br>(4.3%)  | 21<br>(3.6%)     | 30<br>(4.2%)    | 30<br>(3.9%)   | 60<br>(4.0%)      | 7<br>(2.5%)                 | 9<br>(2.6%)   | 16<br>(2.6%)     | 14<br>(3%)      | 14<br>(2.9%)   | 28<br>(2.9%)     |

**Table S2: Percentage Consumption of Selected Foods in Children aged 2-4 years and 5-8 years (cont)**

| ACAES FFQ Item          |                                   | 2 – 4 year old participants |                |                  |                 |                |                   | 5 – 8 year old participants |                |                  |                 |                |                  |
|-------------------------|-----------------------------------|-----------------------------|----------------|------------------|-----------------|----------------|-------------------|-----------------------------|----------------|------------------|-----------------|----------------|------------------|
|                         |                                   | NNS (1995)                  |                |                  | ANCPAS (2007)   |                |                   | NNS (1995)                  |                |                  | ANCPAS (2007)   |                |                  |
|                         |                                   | Female<br>n=299             | Male<br>n=282  | Persons<br>n=581 | Female<br>n=715 | Male<br>n=776  | Persons<br>n=1491 | Female<br>n=282             | Male<br>n=342  | Persons<br>n=624 | Female<br>n=474 | Male<br>n=481  | Persons<br>n=955 |
| F24                     | Other beans, lentils              | 4<br>(1.3%)                 | 8<br>(2.8%)    | 12<br>(2.1%)     | 18<br>(2.5%)    | 10<br>(1.3%)   | 28<br>(1.9%)      | 3<br>(1.1%)                 | 3<br>(0.9%)    | 6<br>(1.0%)      | 7<br>(1.5%)     | 9<br>(1.9%)    | 16<br>(1.7%)     |
| F25                     | Canned fruit                      | 6<br>(2.0%)                 | 2<br>(0.7%)    | 8<br>(1.4%)      | 49<br>(6.9%)    | 52<br>(6.7%)   | 101<br>(6.8%)     | 5<br>(1.8%)                 | 2<br>(0.6%)    | 7<br>(1.1%)      | 25<br>(5.3%)    | 28<br>(5.8%)   | 53<br>(5.5%)     |
| F26                     | Fruit salad                       | 8<br>(2.7%)                 | 7<br>(2.5%)    | 15<br>(2.6%)     | 22<br>(3.1%)    | 34<br>(4.4%)   | 56<br>(3.8%)      | 6<br>(2.1%)                 | 7<br>(2.0%)    | 13<br>(2.1%)     | 9<br>(1.9%)     | 6<br>(1.2%)    | 15<br>(1.6%)     |
| F27                     | Dried fruit                       | 30<br>(10.0%)               | 24<br>(8.5%)   | 54<br>(9.3%)     | 99<br>(13.8%)   | 133<br>(17.1%) | 232<br>(15.6%)    | 26<br>(9.2%)                | 7<br>(2.0%)    | 33<br>(5.3%)     | 28<br>(5.9%)    | 32<br>(6.7%)   | 60<br>(6.3%)     |
| F28                     | Apple or pear                     | 116<br>(38.8%)              | 129<br>(45.7%) | 245<br>(42.2%)   | 347<br>(48.5%)  | 398<br>(51.3%) | 745<br>(50%)      | 139<br>(49.3%)              | 108<br>(31.6%) | 247<br>(39.6%)   | 184<br>(38.8%)  | 179<br>(37.2%) | 363<br>(38.0%)   |
| F29                     | Orange, mandarin, grapefruit      | 57<br>(19.1%)               | 50<br>(17.7%)  | 107<br>(18.4%)   | 159<br>(22.2%)  | 171<br>(22%)   | 330<br>(22.1%)    | 58<br>(20.6%)               | 55<br>(16.1%)  | 113<br>(18.1%)   | 95<br>(20%)     | 83<br>(17.3%)  | 178<br>(18.6%)   |
| F30                     | Banana                            | 78<br>(26.1%)               | 71<br>(25.2%)  | 149<br>(25.6%)   | 280<br>(39.2%)  | 253<br>(32.6%) | 533<br>(35.7%)    | 66<br>(23.4%)               | 64<br>(18.7%)  | 130<br>(20.8%)   | 108<br>(22.8%)  | 118<br>(24.5%) | 226<br>(23.7%)   |
| <b>Seasonal Fruits:</b> |                                   |                             |                |                  |                 |                |                   |                             |                |                  |                 |                |                  |
| FS1                     | Peach, nectarine, plum or apricot | 24<br>(8.0%)                | 19<br>(6.7%)   | 43<br>(7.4%)     | 9<br>(1.3%)     | 10<br>(1.3%)   | 19<br>(1.3%)      | 25<br>(8.9%)                | 26<br>(7.6%)   | 51<br>(8.2%)     | 16<br>(3.4%)    | 10<br>(2.1%)   | 26<br>(2.7%)     |
| FS2                     | Mango or paw-paw                  | 1<br>(0.3%)                 | 3<br>(1.1%)    | 4<br>(0.7%)      | 5<br>(0.7%)     | 2<br>(0.3%)    | 7<br>(0.5%)       | 3<br>(1.1%)                 | 1<br>(0.3%)    | 4<br>(0.6%)      | 2<br>(0.4%)     | 0<br>(0%)      | 2<br>(0.2%)      |
| FS3                     | Pineapple                         | 2<br>(1.0%)                 | 4<br>(1.4%)    | 6<br>(1.0%)      | 13<br>(1.8%)    | 6<br>(0.8%)    | 19<br>(1.3%)      | 9<br>(3.2%)                 | 7<br>(2.0%)    | 16<br>(2.6%)     | 2<br>(0.4%)     | 5<br>(1%)      | 7<br>(0.7%)      |
| FS4                     | Grapes, strawberries, blueberries | 23<br>(7.7%)                | 18<br>(6.4%)   | 41<br>(7.1%)     | 153<br>(21.4%)  | 144<br>(18.6%) | 297<br>(19.9%)    | 29<br>(10.3%)               | 21<br>(6.1%)   | 50<br>(8.0%)     | 61<br>(12.9%)   | 49<br>(10.2%)  | 110<br>(11.5%)   |
| FS5                     | Melon                             | 14<br>(4.7%)                | 9<br>(3.2%)    | 23<br>(4.0%)     | 64<br>(9%)      | 92<br>(11.9%)  | 156<br>(10.5%)    | 14<br>(5.0%)                | 12<br>(3.5%)   | 26<br>(4.2%)     | 45<br>(9.5%)    | 40<br>(8.3%)   | 85<br>(8.9%)     |

**Table S3: Percentage Consumption of Selected Foods in Children aged 9-12 years and 13-16 years**

| ACAES FFQ Item      |                                                                       | 9 – 12 year old participants |                |                  |                 |                |                  | 13 – 16 year old participants |                |                  |                 |                |                   |
|---------------------|-----------------------------------------------------------------------|------------------------------|----------------|------------------|-----------------|----------------|------------------|-------------------------------|----------------|------------------|-----------------|----------------|-------------------|
|                     |                                                                       | NNS (1995)                   |                |                  | ANCNPAS (2007)  |                |                  | NNS (1995)                    |                |                  | ANCNPAS (2007)  |                |                   |
|                     |                                                                       | Female<br>n=253              | Male<br>n=291  | Persons<br>n=544 | Female<br>n=509 | Male<br>n=457  | Persons<br>n=966 | Female<br>n=217               | Male<br>n=232  | Persons<br>n=449 | Female<br>n=694 | Male<br>n=695  | Persons<br>n=1389 |
| <b>Drinks</b>       |                                                                       |                              |                |                  |                 |                |                  |                               |                |                  |                 |                |                   |
| D1                  | DIET soft drink                                                       | 21<br>(8.3%)                 | 26<br>(8.9%)   | 47<br>(8.6%)     | 28<br>(5.5%)    | 24<br>(5.3%)   | 52<br>(5.4%)     | 24<br>(11.1%)                 | 17<br>(7.3%)   | 41<br>(9.1%)     | 53<br>(7.6%)    | 69<br>(9.9%)   | 122<br>(8.8%)     |
| D2                  | Soft drink (NOT DIET) including flavoured mineral water               | 112<br>(44.3%)               | 121<br>(41.6%) | 233<br>(42.8%)   | 145<br>(28.5%)  | 148<br>(32.4%) | 293<br>(30.3%)   | 110<br>(50.7%)                | 144<br>(62.1%) | 254<br>(56.6%)   | 217<br>(31.3%)  | 280<br>(40.3%) | 497<br>(35.8%)    |
| D3                  | Water - including bottled water. unflavoured mineral water, tap water | 248<br>(98.0%)               | 275<br>(94.5%) | 523<br>(96.1%)   | 488<br>(95.9%)  | 439<br>(96.1%) | 927<br>(96%)     | 214<br>(98.6%)                | 230<br>(99.1%) | 444<br>(98.9%)   | 630<br>(90.8%)  | 623<br>(89.6%) | 1253<br>(90.2%)   |
| D4                  | Fruit juice-based drinks                                              | 94<br>(37.2%)                | 85<br>(29.2%)  | 179<br>(32.9%)   | 230<br>(45.2%)  | 203<br>(44.4%) | 433<br>(44.8%)   | 90<br>(41.5%)                 | 70<br>(30.2%)  | 160<br>(35.6%)   | 317<br>(45.7%)  | 289<br>(41.6%) | 606<br>(43.6%)    |
| D5                  | Cordial or 'make up'                                                  | 159<br>(62.8%)               | 174<br>(59.8%) | 333<br>(61.2%)   | 105<br>(20.6%)  | 104<br>(22.8%) | 209<br>(21.6%)   | 97<br>(44.7%)                 | 119<br>(51.3%) | 216<br>(48.1%)   | 124<br>(17.9%)  | 154<br>(22.2%) | 278<br>(20%)      |
| D6                  | Tea or Coffee                                                         | 57<br>(22.5%)                | 35<br>(12.0%)  | 92<br>(16.9%)    | 41<br>(8.1%)    | 27<br>(5.9%)   | 68<br>(7%)       | 66<br>(30.4%)                 | 62<br>(26.7%)  | 128<br>(28.5%)   | 133<br>(19.2%)  | 118<br>(17%)   | 251<br>(18.1%)    |
| D7                  | Beer                                                                  | 0<br>(0%)                    | 0<br>(0%)      | 0<br>(0%)        | 0<br>(0%)       | 0<br>(0%)      | 0<br>(0%)        | 5<br>(2.3%)                   | 10<br>(4.3%)   | 15<br>(3.3%)     | 0<br>(0%)       | 1<br>(0.1%)    | 1<br>(0.1%)       |
| D8                  | Wine or wine coolers                                                  | 2<br>(0.8%)                  | 2<br>(0.7%)    | 4<br>(0.7%)      | 4<br>(0.8%)     | 2<br>(0.4%)    | 6<br>(0.6%)      | 3<br>(1.4%)                   | 0<br>(0%)      | 3<br>(0.7%)      | 7<br>(1%)       | 7<br>(1%)      | 14<br>(1%)        |
| D9                  | Spirits                                                               | 1<br>(0.4%)                  | 0<br>(0%)      | 1<br>(0.2%)      | 1<br>(0.2%)     | 0<br>(0%)      | 1<br>(0.1%)      | 4<br>(1.8%)                   | 2<br>(0.9%)    | 6<br>(1.3%)      | 7<br>(1%)       | 2<br>(0.3%)    | 9<br>(0.6%)       |
| <b>Dairy foods:</b> |                                                                       |                              |                |                  |                 |                |                  |                               |                |                  |                 |                |                   |
| DF1 + DF3           | Soy Milk                                                              | 5<br>(2.0%)                  | 3<br>(1.0%)    | 8<br>(1.5%)      | 6<br>(1.2%)     | 7<br>(1.5%)    | 13<br>(1.3%)     | 1<br>(0.5%)                   | 2<br>(0.9%)    | 3<br>(0.7%)      | 12<br>(1.7%)    | 7<br>(1%)      | 19<br>(1.4%)      |

**Table S3: Percentage Consumption of Selected Foods in Children aged 9-12 years and 13-16 years (cont)**

| ACAES FFQ Item            |                                                             | 9 – 12 year old participants |                |                  |                 |                |                  | 13 – 16 year old participants |                |                  |                 |                |                   |
|---------------------------|-------------------------------------------------------------|------------------------------|----------------|------------------|-----------------|----------------|------------------|-------------------------------|----------------|------------------|-----------------|----------------|-------------------|
|                           |                                                             | NNS (1995)                   |                |                  | ANCPAS (2007)   |                |                  | NNS (1995)                    |                |                  | ANCPAS (2007)   |                |                   |
|                           |                                                             | Female<br>n=253              | Male<br>n=291  | Persons<br>n=544 | Female<br>n=509 | Male<br>n=457  | Persons<br>n=966 | Female<br>n=217               | Male<br>n=232  | Persons<br>n=449 | Female<br>n=694 | Male<br>n=695  | Persons<br>n=1389 |
| DF1 +                     | Whole Milk                                                  | 166<br>(65.6%)               | 187<br>(64.2%) | 353<br>(64.9%)   | 209<br>(41.2%)  | 221<br>(48.4%) | 430<br>(44.5%)   | 115<br>(53%)                  | 147<br>(63.4%) | 262<br>(58.4%)   | 241<br>(34.7%)  | 337<br>(48.5%) | 578<br>(41.6%)    |
| DF3                       |                                                             |                              |                |                  |                 |                |                  |                               |                |                  |                 |                |                   |
| DF1 +                     | Reduced Fat Milk                                            | 66<br>(26.1%)                | 75<br>(25.8%)  | 141<br>(25.9%)   | 120<br>(23.6%)  | 117<br>(48.4%) | 237<br>(24.5%)   | 55<br>(25.3%)                 | 59<br>(25.4%)  | 114<br>(25.4%)   | 133<br>(19.2%)  | 145<br>(20.9%) | 278<br>(20.0%)    |
| DF3                       |                                                             |                              |                |                  |                 |                |                  |                               |                |                  |                 |                |                   |
| DF1 +                     | Skim Milk                                                   | 7<br>(2.8%)                  | 9<br>(3.1%)    | 16<br>(2.9%)     | 32<br>(6.3%)    | 17<br>(3.7%)   | 49<br>(5.1%)     | 6<br>(2.8%)                   | 9<br>(3.9%)    | 15<br>(3.3%)     | 36<br>(5.2%)    | 23<br>(3.3%)   | 59<br>(4.2%)      |
| DF3                       |                                                             |                              |                |                  |                 |                |                  |                               |                |                  |                 |                |                   |
| DF2                       | Flavoured milk                                              | 22<br>(8.7%)                 | 33<br>(11.3%)  | 55<br>(10.1%)    | 83<br>(16.3%)   | 75<br>(16.4%)  | 158<br>(16.4%)   | 25<br>(11.5%)                 | 28<br>(12.1%)  | 53<br>(11.8%)    | 126<br>(18.2%)  | 128<br>(18.4%) | 254<br>(18.3%)    |
| DF4                       | Cream or sour cream                                         | 21<br>(8.3%)                 | 16<br>(5.5%)   | 37<br>(6.8%)     | 26<br>(5.1%)    | 28<br>(6.1%)   | 54<br>(5.6%)     | 19<br>(8.8%)                  | 9<br>(3.9%)    | 28<br>(6.2%)     | 46<br>(6.6%)    | 32<br>(4.6%)   | 78<br>(5.6%)      |
| DF5                       | Ice cream                                                   | 71<br>(28.0%)                | 77<br>(26.5%)  | 148<br>(27.2%)   | 116<br>(22.8%)  | 97<br>(21.2%)  | 213<br>(22.0%)   | 39<br>(18%)                   | 54<br>(23.3%)  | 93<br>(20.7%)    | 100<br>(14.4%)  | 127<br>(18.3%) | 227<br>(16.3%)    |
| DF6                       | Frozen yoghurt                                              | 3<br>(1.2%)                  | 4<br>(1.4%)    | 7<br>(1.3%)      | 4<br>(0.8%)     | 5<br>(1.1%)    | 9<br>(0.9%)      | 0<br>(0%)                     | 2<br>(0.9%)    | 2<br>(0.4%)      | 6<br>(0.9%)     | 4<br>(0.6%)    | 10<br>(0.7%)      |
| DF7                       | Yoghurt (not frozen) plain or flavoured                     | 24<br>(9.4%)                 | 21<br>(7.2%)   | 45<br>(8.3%)     | 73<br>(14.3%)   | 65<br>(14.2%)  | 138<br>(14.3%)   | 22<br>(10.1%)                 | 19<br>(8.2%)   | 41<br>(9.1%)     | 94<br>(13.5%)   | 74<br>(10.6%)  | 168<br>(12.1%)    |
| DF8                       | Cottage cheese or ricotta                                   | 2<br>(0.8%)                  | 1<br>(0.3%)    | 3<br>(0.6%)      | 2<br>(0.4%)     | 1<br>(0.2%)    | 3<br>(0.3%)      | 4<br>(1.8%)                   | 0<br>(0%)      | 4<br>(0.9%)      | 3<br>(0.4%)     | 1<br>(0.1%)    | 4<br>(0.3%)       |
| DF9                       | Cheese including cheese on sandwiches, biscuits or on toast | 104<br>(40.9%)               | 92<br>(31.6%)  | 196<br>(36.0%)   | 208<br>(40.9%)  | 166<br>(36.3%) | 374<br>(38.7%)   | 91<br>(41.9%)                 | 99<br>(42.7%)  | 190<br>(42.3%)   | 256<br>(36.9%)  | 245<br>(35.3%) | 501<br>(36.1%)    |
| DF10                      | Cheese spread, cream cheese                                 | 21<br>(8.3%)                 | 14<br>(4.8%)   | 35<br>(6.4%)     | 15<br>(2.9%)    | 10<br>(2.2%)   | 25<br>(2.6%)     | 22<br>(10.1%)                 | 10<br>(4.3%)   | 32<br>(7.1%)     | 16<br>(2.3%)    | 20<br>(2.9%)   | 36<br>(2.6%)      |
| <b>Breads and Cereal:</b> |                                                             |                              |                |                  |                 |                |                  |                               |                |                  |                 |                |                   |
| B1                        | Muesli                                                      | 9<br>(3.5%)                  | 11<br>(3.8%)   | 20<br>(3.7%)     | 11<br>(2.2%)    | 3<br>(0.7%)    | 14<br>(1.4%)     | 10<br>(4.6%)                  | 1<br>(0.4%)    | 11<br>(2.4%)     | 8<br>(1.2%)     | 9<br>(1.3%)    | 17<br>(1.2%)      |



**Table S3: Percentage Consumption of Selected Foods in Children aged 9-12 years and 13-16 years (cont)**

| ACAES FFQ Item            |                                                             | 9 – 12 year old participants |                |                  |                 |                |                  | 13 – 16 year old participants |                |                  |                 |                |                   |
|---------------------------|-------------------------------------------------------------|------------------------------|----------------|------------------|-----------------|----------------|------------------|-------------------------------|----------------|------------------|-----------------|----------------|-------------------|
|                           |                                                             | NNS (1995)                   |                |                  | ANCPAS (2007)   |                |                  | NNS (1995)                    |                |                  | ANCPAS (2007)   |                |                   |
|                           |                                                             | Female<br>n=253              | Male<br>n=291  | Persons<br>n=544 | Female<br>n=509 | Male<br>n=457  | Persons<br>n=966 | Female<br>n=217               | Male<br>n=232  | Persons<br>n=449 | Female<br>n=694 | Male<br>n=695  | Persons<br>n=1389 |
| B2                        | Cooked porridge                                             | 5<br>(2.0%)                  | 4<br>(1.4%)    | 9<br>(1.7%)      | 23<br>(4.5%)    | 26<br>(5.7%)   | 49<br>(5.1%)     | 6<br>(2.8%)                   | 6<br>(2.6%)    | 12<br>(2.7%)     | 30<br>(4.3%)    | 20<br>(2.9%)   | 50<br>(3.6%)      |
| B3                        | Breakfast cereal                                            | 143<br>(56.3%)               | 203<br>(69.8%) | 346<br>(63.6%)   | 191<br>(37.5%)  | 247<br>(54%)   | 438<br>(45.3%)   | 97<br>(44.7%)                 | 157<br>(67.7%) | 254<br>(56.6%)   | 205<br>(29.5%)  | 357<br>(51.4%) | 562<br>(40.5%)    |
| B5                        | Bread, pita bread, roll – White                             | 238<br>(93.7%)               | 238<br>(81.8%) | 476<br>(87.5%)   | 284<br>(55.8%)  | 266<br>(58.2%) | 550<br>(57%)     | 154<br>(71%)                  | 187<br>(80.6%) | 341<br>(75.9%)   | 342<br>(49.3%)  | 391<br>(56.3%) | 733<br>(52.8%)    |
| B5                        | Bread, pita bread, roll – Mixed Grain                       | 21<br>(8.3%)                 | 17<br>(5.8%)   | 38<br>(7.0%)     | 51<br>(10%)     | 32<br>(7%)     | 83<br>(8.6%)     | 29<br>(13.4%)                 | 17<br>(7.3%)   | 46<br>(10.2%)    | 80<br>(11.5%)   | 61<br>(8.8%)   | 141<br>(10.2%)    |
| B5                        | Bread, pita bread, roll - Wholemeal                         | 37<br>(14.6%)                | 46<br>(15.8%)  | 83<br>(15.3%)    | 73<br>(14.3%)   | 72<br>(15.8%)  | 145<br>(15.0%)   | 31<br>(14.3%)                 | 21<br>(9.1%)   | 52<br>(11.6%)    | 106<br>(15.3%)  | 91<br>(13.1%)  | 197<br>(14.2%)    |
| B6                        | English muffin, bagel or crumpet                            | 10<br>(3.9%)                 | 12<br>(4.1%)   | 22<br>(4.0%)     | 25<br>(4.9%)    | 21<br>(4.6%)   | 46<br>(4.8%)     | 11<br>(5.1%)                  | 9<br>(3.9%)    | 20<br>(4.5%)     | 35<br>(5.0%)    | 42<br>(6.0%)   | 77<br>(5.5%)      |
| B7                        | Rice                                                        | 34<br>(13.4%)                | 30<br>(10.3%)  | 64<br>(11.8%)    | 80<br>(15.7%)   | 65<br>(14.2%)  | 145<br>(15%)     | 22<br>(10.1%)                 | 23<br>(9.9%)   | 45<br>(10.0%)    | 108<br>(15.6%)  | 121<br>(17.4%) | 229<br>(16.5%)    |
| B8                        | Other grains eg. cous cous, burghul                         | -                            | -              | -                | 3<br>(0.6%)     | 2<br>(0.4%)    | 5<br>(0.5%)      | -                             | -              | -                | 4<br>(0.6%)     | 3<br>(0.4%)    | 7<br>(0.5%)       |
| B9                        | Noodles                                                     | 18<br>(7.1%)                 | 14<br>(4.8%)   | 32<br>(5.9%)     | 11<br>(2.2%)    | 9<br>(2%)      | 20<br>(2.1%)     | 15<br>(6.9%)                  | 12<br>(5.2%)   | 27<br>(6.0%)     | 14<br>(2.0%)    | 11<br>(1.6%)   | 25<br>(1.8%)      |
| B10                       | Pasta                                                       | 23<br>(9.1%)                 | 29<br>(10.0%)  | 52<br>(9.6%)     | 106<br>(20.8%)  | 98<br>(21.4%)  | 204<br>(21.1%)   | 31<br>(14.3%)                 | 22<br>(9.5%)   | 53<br>(11.8%)    | 142<br>(20.5%)  | 151<br>(21.7%) | 293<br>(21.1%)    |
| <b>Sweets and Snacks:</b> |                                                             |                              |                |                  |                 |                |                  |                               |                |                  |                 |                |                   |
| S1                        | Cakes, sweet muffins, scones, pikelets, pancakes, hot cakes | 84<br>(33.1%)                | 87<br>(29.9%)  | 171<br>(31.4%)   | 145<br>(28.5%)  | 113<br>(24.7%) | 258<br>(26.7%)   | 54<br>(24.9%)                 | 45<br>(19.4%)  | 99<br>(22.0%)    | 180<br>(25.9%)  | 167<br>(24%)   | 347<br>(25%)      |
| S2                        | Sweet pies or sweet pastries                                | 32<br>(12.6%)                | 19<br>(6.5%)   | 51<br>(9.4%)     | 46<br>(9%)      | 39<br>(8.5%)   | 85<br>(8.8%)     | 27<br>(12.4%)                 | 31<br>(13.4%)  | 58<br>(12.9%)    | 42<br>(6.1%)    | 51<br>(7.3%)   | 93<br>(6.7%)      |

**Table S3: Percentage Consumption of Selected Foods in Children aged 9-12 years and 13-16 years (cont)**

| ACAES FFQ Item     |                                               | 9 – 12 year old participants |               |                  |                 |                |                  | 13 – 16 year old participants |               |                  |                 |                |                   |
|--------------------|-----------------------------------------------|------------------------------|---------------|------------------|-----------------|----------------|------------------|-------------------------------|---------------|------------------|-----------------|----------------|-------------------|
|                    |                                               | NNS (1995)                   |               |                  | ANCPAS (2007)   |                |                  | NNS (1995)                    |               |                  | ANCPAS (2007)   |                |                   |
|                    |                                               | Female<br>n=253              | Male<br>n=291 | Persons<br>n=544 | Female<br>n=509 | Male<br>n=457  | Persons<br>n=966 | Female<br>n=217               | Male<br>n=232 | Persons<br>n=449 | Female<br>n=694 | Male<br>n=695  | Persons<br>n=1389 |
| S3                 | Other puddings or desserts (not ice cream)    | 27<br>(10.6%)                | 31<br>(10.6%) | 58<br>(10.7%)    | 43<br>(8.4%)    | 32<br>(7%)     | 75<br>(7.8%)     | 13<br>(6.0%)                  | 18<br>(7.8%)  | 31<br>(6.9%)     | 43<br>(6.2%)    | 35<br>(5%)     | 78<br>(5.6%)      |
| S4                 | Plain sweet biscuits                          | 53<br>(20.9%)                | 57<br>(19.6%) | 110<br>(20.2%)   | 81<br>(15.9%)   | 69<br>(15.1%)  | 150<br>(15.5%)   | 28<br>(12.9%)                 | 36<br>(15.5%) | 64<br>(14.3%)    | 92<br>(13.3%)   | 92<br>(13.2%)  | 184<br>(13.2%)    |
| S5                 | Cream or chocolate biscuits                   | 46<br>(18.1%)                | 60<br>(20.6%) | 106<br>(19.5%)   | 64<br>(12.6%)   | 75<br>(16.4%)  | 139<br>(14.4%)   | 33<br>(15.2%)                 | 40<br>(17.2%) | 73<br>(16.3%)    | 78<br>(11.2%)   | 100<br>(14.4%) | 178<br>(12.8%)    |
| S6                 | Dry or savoury biscuits, crispbread, crackers | 61<br>(24.0%)                | 68<br>(23.4%) | 129<br>(23.7%)   | 134<br>(26.3%)  | 106<br>(23.2%) | 240<br>(24.8%)   | 49<br>(22.6%)                 | 38<br>(16.4%) | 87<br>(19.4%)    | 124<br>(17.9%)  | 109<br>(15.7%) | 233<br>(16.8%)    |
| S7                 | Savoury combination snacks                    | -                            | -             | -                | 15<br>(2.9%)    | 12<br>(2.6%)   | 27<br>(2.8%)     | -                             | -             | -                | 11<br>(1.6%)    | 13<br>(1.9%)   | 24<br>(1.7%)      |
| S8                 | Sweet combination snacks                      | -                            | -             | -                | -               | -              | -                | -                             | -             | -                | -               | -              | -                 |
| S9                 | Snack noodles                                 | -                            | -             | -                | 33<br>(6.5%)    | 38<br>(8.3%)   | 71<br>(7.3%)     | -                             | -             | -                | 52<br>(7.5%)    | 48<br>(6.9%)   | 100<br>(7.2%)     |
| S10                | Fruit bars                                    | 29<br>(11.4%)                | 24<br>(8.2%)  | 53<br>(9.7%)     | 0<br>(0%)       | 0<br>(0%)      | 0<br>(0%)        | 12<br>(5.5%)                  | 12<br>(5.2%)  | 24<br>(5.3%)     | 0<br>(0%)       | 0<br>(0%)      | 0<br>(0%)         |
| S11                | Snack bars                                    | -                            | -             | -                | 19<br>(3.7%)    | 18<br>(3.9%)   | 37<br>(3.8%)     | -                             | -             | -                | 26<br>(3.7%)    | 32<br>(4.6%)   | 58<br>(4.2%)      |
| S12                | Muesli bars                                   | 26<br>(10.2%)                | 31<br>(10.7%) | 57<br>(10.5%)    | 63<br>(12.4%)   | 60<br>(13.1%)  | 123<br>(12.7%)   | 13<br>(6.0%)                  | 25<br>(10.8%) | 38<br>(8.5%)     | 97<br>(14.0%)   | 114<br>(16.4%) | 211<br>(15.2%)    |
| <b>Main Meals:</b> |                                               |                              |               |                  |                 |                |                  |                               |               |                  |                 |                |                   |
| M1                 | Mince dish                                    | 34<br>(13.4%)                | 36<br>(12.4%) | 70<br>(12.9%)    | 63<br>(12.4%)   | 69<br>(15.1%)  | 132<br>(13.7%)   | 37<br>(17.1%)                 | 40<br>(17.2%) | 77<br>(17.1%)    | 84<br>(12.1%)   | 99<br>(14.2%)  | 183<br>(13.2%)    |

**Table S3: Percentage Consumption of Selected Foods in Children aged 9-12 years and 13-16 years (cont)**

| ACAES FFQ Item      |                                                                   | 9 – 12 year old participants |               |                  |                 |               |                  | 13 – 16 year old participants |               |                  |                 |                |                   |
|---------------------|-------------------------------------------------------------------|------------------------------|---------------|------------------|-----------------|---------------|------------------|-------------------------------|---------------|------------------|-----------------|----------------|-------------------|
|                     |                                                                   | NNS (1995)                   |               |                  | ANCPAS (2007)   |               |                  | NNS (1995)                    |               |                  | ANCPAS (2007)   |                |                   |
|                     |                                                                   | Female<br>n=253              | Male<br>n=291 | Persons<br>n=544 | Female<br>n=509 | Male<br>n=457 | Persons<br>n=966 | Female<br>n=217               | Male<br>n=232 | Persons<br>n=449 | Female<br>n=694 | Male<br>n=695  | Persons<br>n=1389 |
| M2-3, M5,<br>M11-12 | Mixed meat dish                                                   | 32<br>(12.6%)                | 32<br>(11%)   | 64<br>(11.8%)    | 12<br>(2.4%)    | 8<br>(1.8%)   | 20<br>(2.0%)     | 26<br>(12.0%)                 | 32<br>(13.8%) | 58<br>(12.9%)    | 22<br>(3.2%)    | 18<br>(2.6%)   | 40<br>(2.9%)      |
| M4                  | Plain meat (beef<br>or lamb)<br>WITHOUT<br>vegetables or<br>salad | 76<br>(29.9%)                | 79<br>(27.1%) | 155<br>(28.5%)   | 84<br>(16.5%)   | 91<br>(19.9%) | 175<br>(18.1%)   | 67<br>(30.9%)                 | 56<br>(24.1%) | 123<br>(27.4%)   | 129<br>(18.6%)  | 148<br>(21.3%) | 277<br>(19.9%)    |
| M6-7,<br>M10        | Mixed chicken<br>dish                                             | 9<br>(3.5%)                  | 8<br>(2.7%)   | 17<br>(3.1%)     | 30<br>(5.9%)    | 20<br>(4.4%)  | 50<br>(5.2%)     | 14<br>(6.5%)                  | 9<br>(3.9%)   | 23<br>(5.1%)     | 39<br>(5.6%)    | 58<br>(8.3%)   | 97<br>(6.9%)      |
| M8                  | Chicken crumbed                                                   | 15<br>(5.9%)                 | 28<br>(9.6%)  | 43<br>(7.9%)     | 56<br>(11%)     | 41<br>(9%)    | 97<br>(10%)      | 22<br>(10.1%)                 | 27<br>(11.6%) | 49<br>(10.9%)    | 59<br>(8.5%)    | 69<br>(9.9%)   | 128<br>(9.2%)     |
| M9                  | Plain chicken<br>WITHOUT<br>vegetables                            | 53<br>(20.9%)                | 31<br>(10.7%) | 84<br>(15.4%)    | 85<br>(16.7%)   | 89<br>(19.5%) | 174<br>(18%)     | 43<br>(19.8%)                 | 43<br>(18.5%) | 86<br>(19.2%)    | 119<br>(17.1%)  | 137<br>(19.7%) | 256<br>(18.4%)    |
| M13                 | Plain pork<br>WITHOUT<br>vegetables                               | 22<br>(8.7%)                 | 16<br>(5.5%)  | 38<br>(7.0%)     | 16<br>(3.1%)    | 18<br>(3.9%)  | 34<br>(3.5%)     | 10<br>(4.6%)                  | 5<br>(2.2%)   | 15<br>(3.3%)     | 29<br>(4.2%)    | 21<br>(3%)     | 50<br>(3.6%)      |
| M15                 | Liver – beef, calf,<br>chicken                                    | 0<br>(0%)                    | 2<br>(0.7%)   | 2<br>(3.7%)      | 3<br>(0.6%)     | 0<br>(0%)     | 3<br>(0.3%)      | 1<br>(0.5%)                   | 0<br>(0%)     | 1<br>(0.2%)      | 1<br>(0.1%)     | 1<br>(0.1%)    | 2<br>(0.1%)       |
| M16-17              | Fish                                                              | 12<br>(4.7%)                 | 17<br>(5.8%)  | 29<br>(5.3%)     | 28<br>(5.5%)    | 27<br>(5.9%)  | 55<br>(5.7%)     | 10<br>(4.6%)                  | 22<br>(9.5%)  | 32<br>(7.1%)     | 31<br>(4.5%)    | 13<br>(1.9%)   | 44<br>(3.2%)      |
| M18                 | Canned tuna,<br>salmon, sardines<br>including patties             | 8<br>(3.1%)                  | 5<br>(1.7%)   | 13<br>(2.4%)     | 25<br>(4.9%)    | 16<br>(3.5%)  | 41<br>(4.2%)     | 6<br>(2.8%)                   | 0<br>(0%)     | 6<br>(1.3%)      | 26<br>(3.7%)    | 20<br>(2.9%)   | 46<br>(3.3%)      |
| M19                 | Other seafood                                                     | 4<br>(1.6%)                  | 6<br>(2.1%)   | 10<br>(1.8%)     | 9<br>(1.8%)     | 9<br>(2%)     | 18<br>(1.9%)     | 5<br>(2.3%)                   | 4<br>(1.7%)   | 9<br>(2.0%)      | 12<br>(1.7%)    | 9<br>(1.3%)    | 21<br>(1.5%)      |
| M20-21              | Creamy or Clear<br>soup                                           | 23<br>(9.1%)                 | 27<br>(9.3%)  | 50<br>(9.2%)     | 44<br>(8.6%)    | 29<br>(6.3%)  | 73<br>(7.6%)     | 14<br>(6.5%)                  | 11<br>(4.7%)  | 25<br>(5.6%)     | 71<br>(10.2%)   | 55<br>(7.9%)   | 126<br>(9.1%)     |
| M22                 | Tacos, burritos,<br>enchiladas                                    | 0<br>(0%)                    | 0<br>(0%)     | 0<br>(0%)        | 15<br>(2.9%)    | 13<br>(2.8%)  | 28<br>(2.9%)     | 0<br>(0%)                     | 1<br>(0.4%)   | 1<br>(0.2%)      | 8<br>(1.2%)     | 8<br>(1.2%)    | 16<br>(1.2%)      |

**Table S3: Percentage Consumption of Selected Foods in Children aged 9-12 years and 13-16 years (cont)**

| ACAES FFQ Item      |                                 | 9 – 12 year old participants |               |                  |                 |                |                  | 13 – 16 year old participants |               |                  |                 |                |                   |
|---------------------|---------------------------------|------------------------------|---------------|------------------|-----------------|----------------|------------------|-------------------------------|---------------|------------------|-----------------|----------------|-------------------|
|                     |                                 | NNS (1995)                   |               |                  | ANCNPAS (2007)  |                |                  | NNS (1995)                    |               |                  | ANCNPAS (2007)  |                |                   |
|                     |                                 | Female<br>n=253              | Male<br>n=291 | Persons<br>n=544 | Female<br>n=509 | Male<br>n=457  | Persons<br>n=966 | Female<br>n=217               | Male<br>n=232 | Persons<br>n=449 | Female<br>n=694 | Male<br>n=695  | Persons<br>n=1389 |
| M23                 | Sausages, frankfurts, Pluto Pup | 46<br>(18.1%)                | 65<br>(22.3%) | 111<br>(20.4%)   | 62<br>(12.2%)   | 68<br>(14.9%)  | 130<br>(13.5%)   | 22<br>(10.1%)                 | 37<br>(15.9%) | 59<br>(13.1%)    | 59<br>(8.5%)    | 93<br>(13.4%)  | 152<br>(10.9%)    |
| M24                 | Hamburger - all types           | 22<br>(8.7%)                 | 18<br>(6.2%)  | 40<br>(7.4%)     | 21<br>(4.1%)    | 31<br>(6.8%)   | 52<br>(5.4%)     | 24<br>(11.1%)                 | 24<br>(10.3%) | 48<br>(10.7%)    | 45<br>(6.5%)    | 41<br>(5.9%)   | 86<br>(6.2%)      |
| M25                 | Pizza                           | 27<br>(10.6%)                | 38<br>(13.1%) | 65<br>(11.9%)    | 40<br>(7.9%)    | 35<br>(7.7%)   | 75<br>(7.8%)     | 21<br>(9.7%)                  | 28<br>(12.1%) | 49<br>(10.9%)    | 54<br>(7.8%)    | 73<br>(10.5%)  | 127<br>(9.1%)     |
| M26                 | Pie, sausage roll, chiko roll   | 44<br>(17.3%)                | 40<br>(13.7%) | 84<br>(15.4%)    | 49<br>(9.6%)    | 57<br>(12.5%)  | 106<br>(11.0%)   | 33<br>(15.2%)                 | 47<br>(20.3%) | 80<br>(17.8%)    | 68<br>(9.8%)    | 89<br>(12.8%)  | 157<br>(11.3%)    |
| M27                 | Hot dog                         | -                            | -             | -                | -               | -              | -                | -                             | -             | -                | -               | -              | -                 |
| M28                 | Savoury pastries                | 11<br>(4.3%)                 | 10<br>(3.4%)  | 21<br>(3.9%)     | 28<br>(5.5%)    | 16<br>(3.5%)   | 44<br>(4.6%)     | 14<br>(6.5%)                  | 17<br>(7.3%)  | 31<br>(6.9%)     | 35<br>(5.0%)    | 18<br>(2.6%)   | 53<br>(3.8%)      |
| M29                 | Hash browns, potato scallops    | 11<br>(4.3%)                 | 6<br>(2.1%)   | 17<br>(3.1%)     | 16<br>(3.1%)    | 7<br>(1.5%)    | 23<br>(2.4%)     | 8<br>(3.7%)                   | 9<br>(3.9%)   | 17<br>(3.8%)     | 11<br>(1.6%)    | 19<br>(2.7%)   | 30<br>(2.2%)      |
| <b>Other Foods:</b> |                                 |                              |               |                  |                 |                |                  |                               |               |                  |                 |                |                   |
| O1                  | Chips (not potato)              | 59<br>(23.2%)                | 41<br>(14.1%) | 100<br>(18.4%)   | 59<br>(11.6%)   | 54<br>(11.8%)  | 113<br>(11.7%)   | 35<br>(16.1%)                 | 29<br>(12.5%) | 64<br>(14.3%)    | 66<br>(9.5%)    | 52<br>(7.5%)   | 118<br>(8.5%)     |
| O2                  | Potato chips or crisps          | 65<br>(25.6%)                | 57<br>(19.6%) | 122<br>(22.4%)   | 95<br>(18.7%)   | 98<br>(21.4%)  | 193<br>(20%)     | 40<br>(18.4%)                 | 47<br>(20.3%) | 87<br>(19.4%)    | 125<br>(18%)    | 134<br>(19.2%) | 259<br>(18.6%)    |
| O3                  | Ice block – creamy              | 34<br>(13.4%)                | 32<br>(11.0%) | 66<br>(12.1%)    | 28<br>(5.5%)    | 29<br>(6.3%)   | 57<br>(5.9%)     | 23<br>(10.6%)                 | 20<br>(8.6%)  | 43<br>(9.6%)     | 36<br>(5.2%)    | 31<br>(4.5%)   | 67<br>(4.8%)      |
| O4                  | Ice block – water               | 32<br>(12.6%)                | 28<br>(9.6%)  | 60<br>(11.0%)    | 29<br>(5.7%)    | 29<br>(6.3%)   | 58<br>(6%)       | 15<br>(6.9%)                  | 11<br>(4.7%)  | 26<br>(5.8%)     | 25<br>(3.6%)    | 24<br>(3.5%)   | 49<br>(3.5%)      |
| O5                  | Chocolate                       | 92<br>(36.2%)                | 93<br>(32.0%) | 185<br>(34.0%)   | 148<br>(29.1%)  | 129<br>(28.2%) | 277<br>(28.7%)   | 83<br>(38.2%)                 | 61<br>(26.3%) | 144<br>(32.1%)   | 186<br>(26.8%)  | 145<br>(20.9%) | 331<br>(23.8%)    |
| O6                  | Lollies without chocolate       | 65<br>(25.6%)                | 58<br>(19.9%) | 123<br>(22.6%)   | 107<br>(21%)    | 102<br>(22.3%) | 209<br>(21.6%)   | 39<br>(18.0%)                 | 28<br>(12.1%) | 67<br>(14.9%)    | 141<br>(20.3%)  | 121<br>(17.4%) | 262<br>(18.9%)    |

**Table S3: Percentage Consumption of Selected Foods in Children aged 9-12 years and 13-16 years (cont)**

| ACAES FFQ Item              |                                                | 9 – 12 year old participants |                |                  |                 |                |                  | 13 – 16 year old participants |               |                  |                 |                |                   |
|-----------------------------|------------------------------------------------|------------------------------|----------------|------------------|-----------------|----------------|------------------|-------------------------------|---------------|------------------|-----------------|----------------|-------------------|
|                             |                                                | NNS (1995)                   |                |                  | ANCPAS (2007)   |                |                  | NNS (1995)                    |               |                  | ANCPAS (2007)   |                |                   |
|                             |                                                | Female<br>n=253              | Male<br>n=291  | Persons<br>n=544 | Female<br>n=509 | Male<br>n=457  | Persons<br>n=966 | Female<br>n=217               | Male<br>n=232 | Persons<br>n=449 | Female<br>n=694 | Male<br>n=695  | Persons<br>n=1389 |
| O7                          | Low fat salad dressing or mayonnaise           | 8<br>(3.1%)                  | 10<br>(3.4%)   | 18<br>(3.3%)     | 13<br>(2.6%)    | 5<br>(1.1%)    | 18<br>(1.9%)     | 6<br>(2.8%)                   | 10<br>(4.3%)  | 16<br>(3.6%)     | 20<br>(2.9%)    | 28<br>(4%)     | 48<br>(3.5%)      |
| O8                          | Salad dressing or mayonnaise - not low fat     | 29<br>(11.4%)                | 28<br>(9.6%)   | 57<br>(10.5%)    | 39<br>(7.7%)    | 39<br>(8.5%)   | 78<br>(8.1%)     | 28<br>(12.9%)                 | 31<br>(13.4%) | 59<br>(13.1%)    | 68<br>(9.8%)    | 74<br>(10.6%)  | 142<br>(10.2%)    |
| O9                          | Nuts                                           | 11<br>(4.3%)                 | 9<br>(3.1%)    | 20<br>(3.7%)     | 24<br>(4.7%)    | 16<br>(3.5%)   | 40<br>(4.1%)     | 11<br>(5.1%)                  | 4<br>(1.7%)   | 15<br>(3.3%)     | 36<br>(5.2%)    | 25<br>(3.6%)   | 61<br>(4.4%)      |
| O10                         | Jam, honey, golden syrup, marmalade            | 40<br>(15.7%)                | 66<br>(22.7%)  | 106<br>(19.5%)   | 90<br>(17.7%)   | 73<br>(16%)    | 163<br>(16.9%)   | 31<br>(14.3%)                 | 21<br>(9.1%)  | 52<br>(11.6%)    | 123<br>(17.7%)  | 111<br>(16%)   | 234<br>(16.8%)    |
| O11                         | Peanut butter, Nutella                         | 56<br>(22.0%)                | 52<br>(17.9%)  | 108<br>(19.9%)   | 67<br>(13.2%)   | 76<br>(16.6%)  | 143<br>(14.8%)   | 13<br>(6.0%)                  | 25<br>(10.8%) | 38<br>(8.5%)     | 80<br>(11.5%)   | 102<br>(14.7%) | 182<br>(13.1%)    |
| O12                         | Vegetemite, Mighty Mite, Promite, Marmite      | -                            | -              | -                | 111<br>(21.8%)  | 76<br>(16.6%)  | 187<br>(19.4%)   | -                             | -             | -                | 141<br>(20.3%)  | 97<br>(14%)    | 238<br>(17.1%)    |
| O13                         | Tomato sauce, barbecue sauce                   | 91<br>(35.8%)                | 112<br>(38.5%) | 203<br>(37.3%)   | 131<br>(25.7%)  | 139<br>(30.4%) | 270<br>(30%)     | 74<br>(34.1%)                 | 98<br>(42.2%) | 172<br>(38.3%)   | 159<br>(22.9%)  | 204<br>(29.4%) | 363<br>(26.1%)    |
| O14                         | Devon, salami                                  | 17<br>(6.7%)                 | 42<br>(14.4%)  | 59<br>(10.8%)    | 30<br>(5.9%)    | 33<br>(7.2%)   | 63<br>(6.5%)     | 21<br>(9.7%)                  | 22<br>(9.5%)  | 43<br>(9.6%)     | 37<br>(5.3%)    | 50<br>(7.2%)   | 87<br>(6.2%)      |
| O15                         | Bacon, ham                                     | 56<br>(22.0%)                | 55<br>(18.9%)  | 111<br>(20.4%)   | 93<br>(18.3%)   | 90<br>(19.7%)  | 183<br>(18.9%)   | 43<br>(19.8%)                 | 62<br>(26.7%) | 105<br>(23.4%)   | 145<br>(20.9%)  | 156<br>(22.4%) | 301<br>(21.7%)    |
| O16                         | Eggs                                           | 40<br>(15.7%)                | 43<br>(14.8%)  | 83<br>(15.3%)    | 58<br>(11.4%)   | 60<br>(13.1%)  | 118<br>(12.2%)   | 21<br>(9.7%)                  | 42<br>(18.1%) | 63<br>(14.0%)    | 101<br>(14.6%)  | 86<br>(12.4%)  | 187<br>(13.5%)    |
| O17                         | Jelly                                          | 9<br>(3.5%)                  | 5<br>(1.7%)    | 14<br>(2.6%)     | 23<br>(4.5%)    | 9<br>(2%)      | 32<br>(3.3%)     | 5<br>(2.3%)                   | 2<br>(0.9%)   | 7<br>(1.6%)      | 10<br>(1.4%)    | 6<br>(0.9%)    | 16<br>(1.2%)      |
| <b>Fruit and Vegetables</b> |                                                |                              |                |                  |                 |                |                  |                               |               |                  |                 |                |                   |
| F1-2                        | Hot chips bought from a shop or cooked at home | 74<br>(29.1%)                | 86<br>(30.0%)  | 160<br>(29.4%)   | 104<br>(20.4%)  | 94<br>(20.6%)  | 198<br>(20.5%)   | 56<br>(25.8%)                 | 78<br>(33.6%) | 134<br>(29.8%)   | 167<br>(24.1%)  | 154<br>(22.2%) | 321<br>(23.1%)    |

**Table S3: Percentage Consumption of Selected Foods in Children aged 9-12 years and 13-16 years (cont)**

| ACAES FFQ Item |                                  | 9 – 12 year old participants |                |                  |                 |                |                  | 13 – 16 year old participants |               |                  |                 |                |                   |
|----------------|----------------------------------|------------------------------|----------------|------------------|-----------------|----------------|------------------|-------------------------------|---------------|------------------|-----------------|----------------|-------------------|
|                |                                  | NNS (1995)                   |                |                  | ANCPAS (2007)   |                |                  | NNS (1995)                    |               |                  | ANCPAS (2007)   |                |                   |
|                |                                  | Female<br>n=253              | Male<br>n=291  | Persons<br>n=544 | Female<br>n=509 | Male<br>n=457  | Persons<br>n=966 | Female<br>n=217               | Male<br>n=232 | Persons<br>n=449 | Female<br>n=694 | Male<br>n=695  | Persons<br>n=1389 |
| F3             | Potato boiled, mashed, baked     | 112<br>(44.1%)               | 115<br>(39.5%) | 227<br>(41.7%)   | 125<br>(24.6%)  | 115<br>(25.2%) | 240<br>(24.8%)   | 95<br>(43.8%)                 | 77<br>(33.2%) | 172<br>(38.3%)   | 158<br>(22.8%)  | 158<br>(22.7%) | 316<br>(22.8%)    |
| F4             | Pumpkin                          | 33<br>(13.0%)                | 37<br>(12.7%)  | 70<br>(12.9%)    | 38<br>(7.5%)    | 25<br>(5.5%)   | 63<br>(6.5%)     | 30<br>(13.8%)                 | 23<br>(9.9%)  | 53<br>(11.8%)    | 50<br>(7.2%)    | 27<br>(3.9%)   | 77<br>(5.5%)      |
| F5             | Sweet potato                     | 5<br>(2.0%)                  | 1<br>(0.3%)    | 6<br>(1.1%)      | 11<br>(2.2%)    | 16<br>(3.5%)   | 27<br>(2.8%)     | 1<br>(0.5%)                   | 5<br>(2.2%)   | 6<br>(1.3%)      | 22<br>(3.2%)    | 20<br>(2.9%)   | 42<br>(3%)        |
| F6             | Cauliflower                      | 17<br>(6.7%)                 | 20<br>(6.9%)   | 37<br>(6.8%)     | 28<br>(5.5%)    | 27<br>(5.9%)   | 55<br>(5.7%)     | 13<br>(6.0%)                  | 13<br>(5.6%)  | 26<br>(2.8%)     | 37<br>(5.3%)    | 30<br>(4.3%)   | 67<br>(4.8%)      |
| F7             | Green beans                      | 29<br>(11.4%)                | 35<br>(12.0%)  | 64<br>(11.8%)    | 51<br>(10%)     | 32<br>(7%)     | 83<br>(8.6%)     | 25<br>(11.5%)                 | 21<br>(9.1%)  | 46<br>(10.2%)    | 61<br>(8.8%)    | 59<br>(8.5%)   | 120<br>(8.6%)     |
| F8             | Spinach                          | 6<br>(2.4%)                  | 6<br>(2.1%)    | 12<br>(2.2%)     | 13<br>(2.6%)    | 8<br>(1.8%)    | 21<br>(2.2%)     | 7<br>(3.2%)                   | 2<br>(0.9%)   | 9<br>(2.0%)      | 21<br>(3.0%)    | 25<br>(3.6%)   | 46<br>(3.3%)      |
| F9             | Cabbage or brussel sprouts       | 19<br>(7.5%)                 | 17<br>(5.8%)   | 36<br>(6.6%)     | 12<br>(2.4%)    | 15<br>(3.3%)   | 27<br>(2.8%)     | 14<br>(6.5%)                  | 10<br>(4.3%)  | 24<br>(5.3%)     | 23<br>(3.3%)    | 26<br>(3.7%)   | 49<br>(3.5%)      |
| F10            | Peas                             | 65<br>(25.6%)                | 54<br>(18.6%)  | 119<br>(21.9%)   | 69<br>(13.6%)   | 56<br>(12.3%)  | 125<br>(12.9%)   | 37<br>(17.1%)                 | 40<br>(17.2%) | 77<br>(17.1%)    | 80<br>(11.5%)   | 78<br>(11.2%)  | 158<br>(11.4%)    |
| F11            | Broccoli                         | 27<br>(10.6%)                | 35<br>(12.0%)  | 62<br>(11.4%)    | 72<br>(14.1%)   | 57<br>(12.5%)  | 129<br>(13.4%)   | 27<br>(12.4%)                 | 20<br>(8.6%)  | 47<br>(10.5%)    | 87<br>(12.5%)   | 81<br>(11.7%)  | 168<br>(12.1%)    |
| F12            | Carrots                          | 98<br>(38.6%)                | 93<br>(32.0%)  | 191<br>(35.1%)   | 170<br>(33.4%)  | 136<br>(30%)   | 306<br>(31.7%)   | 87<br>(40.1%)                 | 65<br>(28.0%) | 152<br>(33.9%)   | 203<br>(29.3%)  | 181<br>(26%)   | 384<br>(27.6%)    |
| F13            | Zucchini, eggplant, squash       | 14<br>(5.5%)                 | 11<br>(3.8%)   | 25<br>(4.6%)     | 21<br>(4.1%)    | 16<br>(3.5%)   | 37<br>(3.8%)     | 11<br>(5.1%)                  | 10<br>(4.3%)  | 21<br>(4.7%)     | 24<br>(3.5%)    | 18<br>(2.6%)   | 42<br>(3%)        |
| F14            | Capsicum                         | 24<br>(9.4%)                 | 19<br>(6.5%)   | 43<br>(7.9%)     | 41<br>(8.1%)    | 35<br>(7.7%)   | 76<br>(7.9%)     | 28<br>(12.9%)                 | 19<br>(8.2%)  | 47<br>(10.5%)    | 55<br>(7.9%)    | 49<br>(7.1%)   | 104<br>(7.5%)     |
| F15            | Corn, sweetcorn, corn on the cob | 26<br>(10.2%)                | 20<br>(6.9%)   | 46<br>(8.5%)     | 53<br>(10.4%)   | 51<br>(11.2%)  | 104<br>(10.8%)   | 23<br>(10.6%)                 | 10<br>(4.3%)  | 33<br>(7.3%)     | 58<br>(8.4%)    | 54<br>(7.8%)   | 112<br>(8.1%)     |
| F16            | Mushrooms                        | 11<br>(4.3%)                 | 9<br>(3.1%)    | 20<br>(3.7%)     | 22<br>(4.3%)    | 16<br>(3.5%)   | 38<br>(3.9%)     | 13<br>(6.0%)                  | 14<br>(6.0%)  | 27<br>(6.0%)     | 41<br>(5.9%)    | 25<br>(3.6%)   | 66<br>(4.8%)      |

**Table S3: Percentage Consumption of Selected Foods in Children aged 9-12 years and 13-16 years (cont)**

| ACAES FFQ Item          |                                    | 9 – 12 year old participants |                |                  |                 |                |                  | 13 – 16 year old participants |               |                  |                 |                |                   |
|-------------------------|------------------------------------|------------------------------|----------------|------------------|-----------------|----------------|------------------|-------------------------------|---------------|------------------|-----------------|----------------|-------------------|
|                         |                                    | NNS (1995)                   |                |                  | ANCPAS (2007)   |                |                  | NNS (1995)                    |               |                  | ANCPAS (2007)   |                |                   |
|                         |                                    | Female<br>n=253              | Male<br>n=291  | Persons<br>n=544 | Female<br>n=509 | Male<br>n=457  | Persons<br>n=966 | Female<br>n=217               | Male<br>n=232 | Persons<br>n=449 | Female<br>n=694 | Male<br>n=695  | Persons<br>n=1389 |
| F17                     | Tomatoes                           | 68<br>(26.8%)                | 72<br>(24.7%)  | 140<br>(25.7%)   | 111<br>(21.8%)  | 79<br>(17.3%)  | 190<br>(19.7%)   | 73<br>(33.6%)                 | 49<br>(21.1%) | 122<br>(27.2%)   | 135<br>(19.5%)  | 142<br>(20.4%) | 277<br>(19.9%)    |
| F18                     | Lettuce                            | 84<br>(33.1%)                | 66<br>(22.7%)  | 150<br>(27.6%)   | 92<br>(18.1%)   | 67<br>(14.7%)  | 159<br>(16.5%)   | 64<br>(29.5%)                 | 60<br>(25.9%) | 124<br>(27.6%)   | 122<br>(17.6%)  | 134<br>(19.3%) | 256<br>(18.4%)    |
| F19                     | Celery, cucumber                   | 42<br>(16.5%)                | 41<br>(14.1%)  | 83<br>(15.3%)    | 68<br>(13.4%)   | 47<br>(10.3%)  | 115<br>(11.9%)   | 33<br>(15.2%)                 | 17<br>(7.3%)  | 50<br>(11.1%)    | 94<br>(13.5%)   | 76<br>(10.9%)  | 170<br>(12.2%)    |
| F20                     | Avocado                            | 3<br>(1.2%)                  | 1<br>(0.3%)    | 4<br>(0.7%)      | 17<br>(3.3%)    | 12<br>(2.6%)   | 29<br>(3.0%)     | 10<br>(4.6%)                  | 2<br>(0.9%)   | 12<br>(2.7%)     | 33<br>(4.8%)    | 19<br>(2.7%)   | 52<br>(3.7%)      |
| F21                     | Onion, spring<br>onion, leek       | 29<br>(11.4%)                | 36<br>(12.4%)  | 65<br>(11.9%)    | 78<br>(15.3%)   | 72<br>(15.8%)  | 150<br>(15.5%)   | 30<br>(13.8%)                 | 41<br>(17.7%) | 71<br>(15.8%)    | 138<br>(19.9%)  | 165<br>(23.7%) | 303<br>(21.8%)    |
| F22                     | Soybeans, tofu                     | 0<br>(0%)                    | 0<br>(0%)      | 0<br>(0%)        | 2<br>(0.4%)     | 3<br>(0.7%)    | 5<br>(0.5%)      | 0<br>(0%)                     | 0<br>(0%)     | 0<br>(0%)        | 5<br>(0.7%)     | 7<br>(1%)      | 12<br>(0.9%)      |
| F23                     | Baked beans                        | 9<br>(3.5%)                  | 10<br>(3.4%)   | 19<br>(3.5%)     | 6<br>(1.2%)     | 10<br>(2.2%)   | 16<br>(1.7%)     | 6<br>(2.8%)                   | 6<br>(2.6%)   | 12<br>(2.7%)     | 12<br>(1.7%)    | 12<br>(1.7%)   | 24<br>(1.7%)      |
| F24                     | Other beans,<br>lentils            | 2<br>(0.8%)                  | 11<br>(3.8%)   | 13<br>(2.4%)     | 7<br>(1.4%)     | 11<br>(2.4%)   | 18<br>(1.9%)     | 3<br>(1.4%)                   | 7<br>(3.0%)   | 10<br>(2.2%)     | 19<br>(2.7%)    | 12<br>(1.7%)   | 31<br>(2.2%)      |
| F25                     | Canned fruit                       | 2<br>(0.8%)                  | 0<br>(0%)      | 2<br>(0.4%)      | 24<br>(4.7%)    | 18<br>(3.9%)   | 42<br>(4.3%)     | 1<br>(0.5%)                   | 3<br>(1.3%)   | 4<br>(0.9%)      | 22<br>(3.2%)    | 19<br>(2.7%)   | 41<br>(3%)        |
| F26                     | Fruit salad                        | 6<br>(2.4%)                  | 1<br>(0.3%)    | 7<br>(1.3%)      | 9<br>(1.8%)     | 8<br>(1.8%)    | 17<br>(1.8%)     | 2<br>(0.9%)                   | 3<br>(1.3%)   | 5<br>(1.1%)      | 11<br>(1.6%)    | 11<br>(1.6%)   | 22<br>(1.6%)      |
| F27                     | Dried fruit                        | 8<br>(3.1%)                  | 10<br>(3.4%)   | 18<br>(3.3%)     | 19<br>(3.7%)    | 18<br>(3.9%)   | 37<br>(3.8%)     | 7<br>(3.2%)                   | 8<br>(3.4%)   | 15<br>(3.3%)     | 36<br>(5.2%)    | 28<br>(4%)     | 64<br>(4.6%)      |
| F28                     | Apple or pear                      | 118<br>(46.5%)               | 106<br>(36.4%) | 224<br>(41.2%)   | 198<br>(38.9%)  | 152<br>(33.3%) | 350<br>(36.2%)   | 73<br>(33.6%)                 | 61<br>(26.3%) | 134<br>(29.8%)   | 198<br>(28.5%)  | 173<br>(24.9%) | 371<br>(26.7%)    |
| F29                     | Orange,<br>mandarin,<br>grapefruit | 43<br>(16.9%)                | 54<br>(18.6%)  | 97<br>(17.8%)    | 84<br>(16.5%)   | 66<br>(14.4%)  | 150<br>(15.5%)   | 23<br>(10.6%)                 | 31<br>(13.4%) | 54<br>(12.0%)    | 125<br>(18.0%)  | 101<br>(14.5%) | 226<br>(16.3%)    |
| F30                     | Banana                             | 40<br>(15.7%)                | 49<br>(16.8%)  | 89<br>(16.4%)    | 95<br>(18.7%)   | 77<br>(16.8%)  | 172<br>(17.8%)   | 21<br>(9.7%)                  | 26<br>(11.2%) | 47<br>(10.5%)    | 87<br>(12.5%)   | 97<br>(14%)    | 184<br>(13.2%)    |
| <b>Seasonal Fruits:</b> |                                    |                              |                |                  |                 |                |                  |                               |               |                  |                 |                |                   |

**Table S3: Percentage Consumption of Selected Foods in Children aged 9-12 years and 13-16 years (cont)**

| ACAES FFQ Item |                                         | 9 – 12 year old participants |               |                  |                 |               |                  | 13 – 16 year old participants |               |                  |                 |               |                   |
|----------------|-----------------------------------------|------------------------------|---------------|------------------|-----------------|---------------|------------------|-------------------------------|---------------|------------------|-----------------|---------------|-------------------|
|                |                                         | NNS (1995)                   |               |                  | ANCPAS (2007)   |               |                  | NNS (1995)                    |               |                  | ANCPAS (2007)   |               |                   |
|                |                                         | Female<br>n=253              | Male<br>n=291 | Persons<br>n=544 | Female<br>n=509 | Male<br>n=457 | Persons<br>n=966 | Female<br>n=217               | Male<br>n=232 | Persons<br>n=449 | Female<br>n=694 | Male<br>n=695 | Persons<br>n=1389 |
| FS1            | Peach, nectarine,<br>plum or apricot    | 24<br>(9.4%)                 | 16<br>(5.5%)  | 40<br>(7.4%)     | 14<br>(2.8%)    | 14<br>(3.1%)  | 28<br>(2.9%)     | 22<br>(10.1%)                 | 6<br>(2.6%)   | 28<br>(6.2%)     | 21<br>(3.0%)    | 9<br>(1.3%)   | 30<br>(2.2%)      |
| FS2            | Mango or Paw-<br>paw                    | 0<br>(0%)                    | 3<br>(1.0%)   | 3<br>(0.6%)      | 0<br>(0%)       | 7<br>(1.5%)   | 7<br>(0.7%)      | 0<br>(0%)                     | 1<br>(0.4%)   | 1<br>(0.2%)      | 0<br>(0%)       | 2<br>(0.3%)   | 2<br>(0.1%)       |
| FS3            | Pineapple                               | 16<br>(6.3%)                 | 14<br>(4.8%)  | 30<br>(5.5%)     | 9<br>(1.8%)     | 6<br>(1.3%)   | 15<br>(1.6%)     | 5<br>(2.3%)                   | 8<br>(3.4%)   | 13<br>(2.9%)     | 11<br>(1.6%)    | 8<br>(1.2%)   | 19<br>(1.4%)      |
| FS4            | Grapes,<br>strawberries,<br>blueberries | 22<br>(8.7%)                 | 24<br>(8.2%)  | 46<br>(8.5%)     | 46<br>(9.0%)    | 38<br>(8.3%)  | 84<br>(8.7%)     | 11<br>(5.1%)                  | 13<br>(5.6%)  | 24<br>(5.3%)     | 57<br>(8.2%)    | 40<br>(5.8%)  | 97<br>(7%)        |
| FS5            | Melon                                   | 14<br>(5.5%)                 | 12<br>(4.1%)  | 26<br>(4.8%)     | 29<br>(5.7%)    | 23<br>(5%)    | 52<br>(5.4%)     | 7<br>(3.2%)                   | 8<br>(3.4%)   | 15<br>(3.3%)     | 25<br>(3.6%)    | 20<br>(2.9%)  | 45<br>(3.2%)      |



**Table S4: Changes to portion size (grams) between 1995 and 2007 for 2-4 year old children**

|                             | Females |                   |      |                   | Males    |         |     |                   | Persons |                   |          |         |     |                   |      |                   |          |         |
|-----------------------------|---------|-------------------|------|-------------------|----------|---------|-----|-------------------|---------|-------------------|----------|---------|-----|-------------------|------|-------------------|----------|---------|
|                             | n =     | 1995 Median [IQR] | n =  | 2007 Median [IQR] | Δ Median | p-value | n = | 1995 Median [IQR] | n =     | 2007 Median [IQR] | Δ Median | p-value | n = | 1995 Median [IQR] | n =  | 2007 Median [IQR] | Δ Median | p-value |
| <b>Food</b>                 |         |                   |      |                   |          |         |     |                   |         |                   |          |         |     |                   |      |                   |          |         |
| <b>Drinks</b>               |         |                   |      |                   |          |         |     |                   |         |                   |          |         |     |                   |      |                   |          |         |
| Soft Drink                  | 96      | 197 [130]         | 89   | 152 [105]         | -45      | 0.002   | 118 | 203 [184]         | 97      | 155 [105]         | -48      | <0.001  | 214 | 197 [147]         | 186  | 153 [105]         | -44      | <0.001  |
| Water                       | 233     | 500 [500]         | 1686 | 180 [150]         | -320     | <0.001  | 214 | 500 [500]         | 1803    | 200 [140]         | -300     | <0.001  | 447 | 500 [500]         | 3489 | 188 [150]         | -312     | <0.001  |
| Fruit Juice                 | 160     | 193 [131]         | 492  | 131 [105]         | -62      | <0.001  | 180 | 193 [131]         | 520     | 131 [150]         | -62      | <0.001  | 340 | 193 [131]         | 1012 | 131 [114]         | -62      | <0.001  |
| <b>Dairy Foods</b>          |         |                   |      |                   |          |         |     |                   |         |                   |          |         |     |                   |      |                   |          |         |
| Whole Milk                  | 451     | 186 [129]         | 1034 | 155 [119]         | -31      | 0.002   | 455 | 194 [129]         | 1183    | 165 [133]         | -29      | <0.001  | 906 | 194 [129]         | 2217 | 155 [129]         | -39      | <0.001  |
| Reduced Fat Milk            | 50      | 130 [141]         | 219  | 130 [102]         | 0        | 0.04    | 38  | 259 [130]         | 221     | 134 [103]         | -125     | <0.001  | 88  | 195 [130]         | 440  | 130 [103]         | -65      | <0.001  |
| Flavored Milk               | 27      | 250 [155]         | 68   | 183 [130]         | -67      | 0.02    | 16  | 258 [52]          | 80      | 208 [103]         | -50      | 0.16    | 43  | 251 [138]         | 148  | 206 [129]         | -45      | 0.01    |
| Ice cream                   | 62      | 55 [55]           | 126  | 42 [38]           | -13      | 0.004   | 57  | 62 [91]           | 109     | 48 [38]           | -14      | <0.001  | 119 | 62 [65]           | 235  | 47 [38]           | -15      | <0.001  |
| Yoghurt                     | 42      | 125 [115]         | 299  | 100 [50]          | -25      | 0.03    | 41  | 104 [130]         | 315     | 100 [60]          | -4       | 0.60    | 83  | 110 [115]         | 614  | 100 [60]          | -10      | 0.06    |
| Cheese                      | 129     | 20 [10]           | 440  | 20 [12]           | 0        | 0.17    | 144 | 20 [9]            | 484     | 21 [13]           | 1        | 0.04    | 273 | 20 [10]           | 924  | 20 [12]           | 0        | 0.02    |
| Cheese Spread               | 32      | 19 [6]            | 47   | 10 [15]           | -9       | 0.001   | 28  | 18 [6]            | 48      | 10 [15]           | -8       | <0.001  | 60  | 18 [6]            | 95   | 10 [15]           | -8       | <0.001  |
| <b>Breads &amp; Cereals</b> |         |                   |      |                   |          |         |     |                   |         |                   |          |         |     |                   |      |                   |          |         |
| Hot Porridge                | 15      | 195 [130]         | 56   | 133 [212]         | -62      | 0.13    | 9   | 260 [98]          | 57      | 195 [194]         | -65      | 0.005   | 24  | 260 [89]          | 113  | 190 [204]         | -70      | 0.006   |
| Breakfast Cereal            | 205     | 30 [15]           | 462  | 23 [17]           | -7       | 0.10    | 222 | 30 [26]           | 521     | 30 [18]           | 0        | 0.14    | 427 | 30 [20]           | 983  | 26 [18]           | -4       | 0.03    |
| White Bread                 | 317     | 48 [37]           | 494  | 37 [33]           | -11      | 0.007   | 354 | 54 [32]           | 589     | 42 [34]           | -12      | 0.001   | 671 | 49 [32]           | 1083 | 40 [34]           | -9       | <0.001  |
| Mixed Grain Bread           | 36      | 52 [39]           | 109  | 42 [34]           | -10      | 0.49    | 29  | 68 [37]           | 153     | 48 [34]           | -20      | 0.11    | 65  | 52 [40]           | 262  | 48 [34]           | -4       | 0.63    |
| Wholemeal Bread             | 79      | 48 [37]           | 255  | 40 [32]           | -8       | 0.65    | 67  | 48 [32]           | 246     | 48 [32]           | 0        | 0.60    | 146 | 48 [33]           | 501  | 42 [33]           | -6       | 0.96    |
| Rice                        | 33      | 95 [127]          | 128  | 95 [94]           | 0        | 0.40    | 36  | 95 [142]          | 122     | 95 [141]          | 0        | 0.86    | 69  | 95 [140]          | 250  | 95 [97]           | 0        | 0.47    |
| Pasta                       | 38      | 148 [75]          | 229  | 113 [111]         | -35      | 0.92    | 43  | 148 [148]         | 247     | 120 [120]         | -28      | 0.32    | 81  | 148 [79]          | 476  | 113 [114]         | -35      | 0.53    |
| <b>Sweets &amp; Snacks</b>  |         |                   |      |                   |          |         |     |                   |         |                   |          |         |     |                   |      |                   |          |         |
| Cake                        | 87      | 50 [48]           | 190  | 45 [39]           | -5       | 0.04    | 62  | 43 [40]           | 218     | 49 [47]           | 6        | 0.31    | 149 | 49 [50]           | 408  | 47 [42]           | -2       | 0.41    |

**Table S4: Changes to portion size (grams) between 1995 and 2007 for 2-4 year old children (cont)**

| Food                     | Females |                         |     |                         |             |             | Males |                         |     |                         |             |             | Persons |                         |     |                         |             |             |
|--------------------------|---------|-------------------------|-----|-------------------------|-------------|-------------|-------|-------------------------|-----|-------------------------|-------------|-------------|---------|-------------------------|-----|-------------------------|-------------|-------------|
|                          | n =     | 1995<br>Median<br>[IQR] | n = | 2007<br>Median<br>[IQR] | Δ<br>Median | p-<br>value | n =   | 1995<br>Median<br>[IQR] | n = | 2007<br>Median<br>[IQR] | Δ<br>Median | p-<br>value | n =     | 1995<br>Median<br>[IQR] | n = | 2007<br>Median<br>[IQR] | Δ<br>Median | p-<br>value |
| Other desserts           | 57      | 100 [90]                | 66  | 86 [64]                 | -14         | 0.59        | 50    | 120 [90]                | 87  | 140 [51]                | 20          | 0.83        | 107     | 114 [90]                | 153 | 140 [58]                | 26          | 0.51        |
| Plain sweet biscuits     | 84      | 18 [16]                 | 171 | 16 [12]                 | -2          | 0.36        | 90    | 19 [20]                 | 187 | 16 [14]                 | -3          | 0.21        | 174     | 18 [19]                 | 358 | 16 [14]                 | -2          | 0.11        |
| Cream/chocolate biscuits | 51      | 17 [16]                 | 80  | 19 [11]                 | 2           | 0.57        | 44    | 21 [19]                 | 102 | 18 [10]                 | -3          | 0.08        | 95      | 19 [16]                 | 182 | 19 [10]                 | 0           | 0.42        |
| Savoury Biscuits         | 90      | 12 [13]                 | 330 | 13 [11]                 | 1           | 0.44        | 79    | 13 [9]                  | 332 | 13 [12]                 | 0           | 0.26        | 169     | 13 [11]                 | 662 | 13 [12]                 | 0           | 0.81        |
| Muesli Bar               | 21      | 31 [3]                  | 57  | 31 [12]                 | 0           | 0.98        | 39    | 31 [3]                  | 62  | 31 [11]                 | 0           | 0.98        | 60      | 31 [3]                  | 119 | 31 [11]                 | 0           | 0.91        |
| <b>Main Meals</b>        |         |                         |     |                         |             |             |       |                         |     |                         |             |             |         |                         |     |                         |             |             |
| Mince Dish               | 18      | 63 [90]                 | 125 | 70 [52]                 | 7           | 0.81        | 26    | 74 [85]                 | 123 | 59 [87]                 | -15         | 0.37        | 44      | 74 [87]                 | 248 | 69 [66]                 | -5          | 0.38        |
| Plain Meat               | 47      | 52 [56]                 | 122 | 46 [41]                 | -6          | 0.41        | 52    | 46 [41]                 | 125 | 47 [49]                 | 1           | 0.77        | 99      | 47 [45]                 | 247 | 46 [50]                 | -1          | 0.44        |
| Crumbed Chicken          | 19      | 67 [74]                 | 73  | 56 [51]                 | -11         | 0.94        | 16    | 69 [51]                 | 50  | 62 [56]                 | -7          | 0.40        | 35      | 67 [61]                 | 123 | 56 [54]                 | -11         | 0.56        |
| Plain Chicken            | 31      | 55 [38]                 | 121 | 49 [52]                 | -6          | 0.95        | 31    | 48 [3]4                 | 134 | 60 [53]                 | 12          | 0.13        | 62      | 49 [35]                 | 255 | 57 [51]                 | 8           | 0.26        |
| Fish                     | 39      | 48 [40]                 | 104 | 71 [54]                 | 23          | <0.001      | 27    | 49 [28]                 | 80  | 71 [56]                 | 22          | 0.03        | 66      | 48 [33]                 | 184 | 71 [64]                 | 23          | <0.001      |
| Soup                     | 21      | 255 [175]               | 50  | 193 [172]               | -62         | 0.14        | 21    | 258 [247]               | 57  | 229 [183]               | -29         | 0.67        | 42      | 257 [189]               | 107 | 195 [175]               | -62         | 0.19        |
| Sausages                 | 50      | 25 [31]                 | 96  | 41 [30]                 | 16          | 0.21        | 46    | 55 [41]                 | 110 | 44 [39]                 | -11         | 0.17        | 96      | 51 [36]                 | 206 | 41 [28]                 | -10         | 0.08        |
| Pie                      | 37      | 87 [73]                 | 32  | 16 [65]                 | -71         | 0.74        | 22    | 97 [111]                | 58  | 98 [84]                 | 1           | 0.44        | 59      | 87 [85]                 | 90  | 97 [76]                 | 10          | 0.63        |
| <b>Other Foods</b>       |         |                         |     |                         |             |             |       |                         |     |                         |             |             |         |                         |     |                         |             |             |
| Chips (not potato)       | 36      | 21 [11]                 | 72  | 20 [15]                 | -1          | 0.09        | 41    | 22 [16]                 | 80  | 18 [12]                 | -4          | 0.03        | 77      | 21 [13]                 | 152 | 18 [13]                 | -3          | 0.005       |
| Potato crisps            | 33      | 25 [16]                 | 77  | 20 [7]                  | -5          | 0.02        | 64    | 25 [4]                  | 71  | 21 [5]                  | -4          | 0.04        | 97      | 25 [6]                  | 148 | 21 [6]                  | -4          | <0.001      |
| Chocolate                | 92      | 18 [18]                 | 152 | 15 [10]                 | -3          | 0.03        | 91    | 19 [17]                 | 176 | 14 [12]                 | -5          | 0.02        | 183     | 18 [18]                 | 328 | 14 [10]                 | -4          | 0.002       |
| Lollies                  | 75      | 14 [11]                 | 135 | 12 [12]                 | -2          | 0.29        | 76    | 14 [10]                 | 122 | 12 [12]                 | -2          | 0.77        | 151     | 14 [12]                 | 257 | 12 [12]                 | -2          | 0.36        |
| Jam/Honey                | 51      | 7 [7]                   | 211 | 7 [7]                   | 0           | 0.17        | 53    | 7 [8]                   | 260 | 7 [7]                   | 0           | 0.15        | 104     | 7 [8]                   | 471 | 7 [7]                   | 0           | 0.03        |
| Peanut Butter            | 86      | 9 [8]                   | 110 | 7 [7]                   | -2          | 0.57        | 83    | 6 [14]                  | 127 | 8 [8]                   | 2           | 0.46        | 169     | 9 [13]                  | 237 | 8 [8]                   | -1          | 0.35        |
| Tomato Sauce             | 101     | 6 [16]                  | 147 | 6 [16]                  | 0           | 0.13        | 82    | 8 [16]                  | 186 | 7 [16]                  | -1          | 0.55        | 183     | 6 [16]                  | 333 | 6 [16]                  | 0           | 0.11        |
| Luncheon Meats           | 39      | 18 [27]                 | 50  | 28 [33]                 | 10          | 0.02        | 33    | 29 [40]                 | 65  | 28 [37]                 | -1          | 0.92        | 72      | 26 [36]                 | 115 | 28 [37]                 | 2           | 0.10        |
| Bacon/Ham                | 50      | 16 [18]                 | 145 | 21 [25]                 | 5           | 0.001       | 61    | 18 [18]                 | 161 | 25 [20]                 | 7           | <0.05       | 111     | 17 [17]                 | 306 | 24 [23]                 | 7           | <0.001      |

**Table S4: Changes to portion size (grams) between 1995 and 2007 for 2-4 year old children (cont)**

| Food                        | Females |                         |     |                         |             |             | Males |                         |     |                         |             |             | Persons |                         |     |                         |             |             |
|-----------------------------|---------|-------------------------|-----|-------------------------|-------------|-------------|-------|-------------------------|-----|-------------------------|-------------|-------------|---------|-------------------------|-----|-------------------------|-------------|-------------|
|                             | n =     | 1995<br>Median<br>[IQR] | n = | 2007<br>Median<br>[IQR] | Δ<br>Median | p-<br>value | n =   | 1995<br>Median<br>[IQR] | n = | 2007<br>Median<br>[IQR] | Δ<br>Median | p-<br>value | n =     | 1995<br>Median<br>[IQR] | n = | 2007<br>Median<br>[IQR] | Δ<br>Median | p-<br>value |
| Eggs                        | 41      | 49 [23]                 | 108 | 43 [38]                 | -6          | 0.92        | 32    | 49 [19]                 | 106 | 42 [41]                 | -7          | 0.33        | 73      | 49 [14]                 | 214 | 43 [40]                 | -6          | 0.47        |
| <b>Fruit and Vegetables</b> |         |                         |     |                         |             |             |       |                         |     |                         |             |             |         |                         |     |                         |             |             |
| Hot Chips                   | 72      | 74 [65]                 | 118 | 75 [60]                 | 1           | 0.19        | 74    | 90 [44]                 | 120 | 75 [55]                 | -15         | 0.001       | 146     | 90 [50]                 | 238 | 75 [60]                 | -15         | 0.002       |
| Potato                      | 99      | 61 [84]                 | 187 | 56 [58]                 | -5          | 0.07        | 89    | 65 [92]                 | 209 | 61 [70]                 | -4          | 0.10        | 188     | 63 [89]                 | 396 | 61 [57]                 | -2          | 0.02        |
| Pumpkin                     | 21      | 66 [66]                 | 64  | 47 [50]                 | -19         | 0.28        | 26    | 53 [49]                 | 60  | 30 [48]                 | -23         | 0.14        | 47      | 57 [66]                 | 124 | 41 [44]                 | -16         | 0.10        |
| Cauliflower                 | 11      | 33 [55]                 | 50  | 34 [29]                 | 1           | 0.36        | 5     | 27 [35]                 | 43  | 29 [16]                 | 2           | 0.51        | 16      | 33 [47]                 | 93  | 29 [29]                 | -4          | 0.40        |
| Green Beans                 | 31      | 19 [21]                 | 53  | 25 [25]                 | 6           | 0.05        | 21    | 20 [29]                 | 61  | 22 [19]                 | 2           | 0.67        | 52      | 19 [25]                 | 114 | 25 [20]                 | 6           | 0.10        |
| Peas                        | 48      | 26 [28]                 | 113 | 12 [28]                 | -14         | 0.02        | 51    | 24 [27]                 | 140 | 16 [15]                 | -8          | 0.01        | 99      | 26 [27]                 | 253 | 14 [24]                 | -12         | <0.001      |
| Broccoli                    | 25      | 23 [30]                 | 116 | 22 [22]                 | -1          | 0.56        | 21    | 41 [60]                 | 107 | 20 [23]                 | -21         | 0.007       | 47      | 29 [41]                 | 223 | 20 [22]                 | -9          | 0.13        |
| Carrots                     | 98      | 23 [32]                 | 255 | 18 [22]                 | -5          | 0.33        | 98    | 19 [30]                 | 298 | 17 [23]                 | -2          | 0.10        | 196     | 21 [38]                 | 553 | 17 [22]                 | -4          | 0.06        |
| Eggplant/Zucchini           | 13      | 21 [19]                 | 39  | 18 [16]                 | -3          | 0.87        | 10    | 10 [12]                 | 54  | 22 [25]                 | 12          | <0.05       | 23      | 15 [16]                 | 93  | 19 [24]                 | 4           | 0.16        |
| Capsicum                    | 10      | 14 [15]                 | 42  | 12 [16]                 | -2          | 0.91        | 19    | 5 [22]                  | 55  | 11 [17]                 | 6           | 0.08        | 29      | 6 [18]                  | 97  | 11 [17]                 | 5           | 0.14        |
| Corn                        | 32      | 34 [49]                 | 106 | 23 [49]                 | -11         | 0.36        | 16    | 30 [71]                 | 119 | 29 [30]                 | -1          | 0.37        | 48      | 32 [66]                 | 225 | 27 [30]                 | -5          | 0.21        |
| Mushroom                    | 17      | 13 [13]                 | 40  | 14 [17]                 | 1           | 0.52        | 20    | 14 [21]                 | 45  | 13 [17]                 | -1          | 0.69        | 37      | 13 [19]                 | 85  | 13 [17]                 | 0           | 0.90        |
| Tomato                      | 42      | 31 [31]                 | 135 | 34 [44]                 | 3           | 0.37        | 33    | 30 [69]                 | 131 | 45 [37]                 | 15          | 0.25        | 75      | 30 [40]                 | 266 | 40 [41]                 | 10          | 0.10        |
| Lettuce                     | 35      | 10 [11]                 | 49  | 8 [15]                  | -2          | 0.53        | 28    | 9 [9]                   | 34  | 7 [6]                   | -2          | 0.02        | 63      | 9 [11]                  | 83  | 8 [10]                  | -1          | 0.07        |
| Celery/Cucumber             | 26      | 19 [27]                 | 86  | 20 [34]                 | 1           | 0.30        | 31    | 11 [20]                 | 81  | 20 [23]                 | 9           | 0.15        | 57      | 13 [22]                 | 167 | 20 [23]                 | 7           | 0.06        |
| Onion                       | 12      | 9 [35]                  | 106 | 8 [8]                   | -1          | 0.19        | 9     | 4 [18]                  | 131 | 8 [9]                   | 4           | 0.40        | 21      | 9 [20]                  | 237 | 8 [9]                   | -1          | 0.65        |
| Canned Fruit                | 6       | 130 [54]                | 52  | 80 [66]                 | -50         | 0.07        | 2     | 102 [77]                | 60  | 72 [81]                 | -30         | 0.38        | 8       | 130 [67]                | 112 | 80 [78]                 | -50         | 0.04        |
| Dried Fruit                 | 39      | 14 [23]                 | 132 | 20 [30]                 | 6           | 0.36        | 31    | 22 [35]                 | 167 | 19 [30]                 | -3          | 0.22        | 70      | 16 [36]                 | 299 | 20 [30]                 | 4           | 0.89        |
| Apple                       | 162     | 85 [84]                 | 453 | 83 [100]                | -2          | 0.28        | 186   | 112 [70]                | 509 | 87 [92]                 | -25         | 0.05        | 348     | 106 [79]                | 962 | 83 [95]                 | -23         | 0.04        |
| Orange                      | 77      | 72 [58]                 | 186 | 66 [52]                 | -6          | 0.06        | 56    | 86 [83]                 | 208 | 86 [49]                 | 0           | 0.58        | 133     | 86 [73]                 | 394 | 72 [53]                 | -14         | 0.12        |
| Banana                      | 92      | 77 [50]                 | 319 | 94 [74]                 | 17          | 0.05        | 91    | 90 [51]                 | 302 | 94 [61]                 | 4           | 0.04        | 183     | 83 [51]                 | 621 | 94 [60]                 | 11          | 0.003       |
| <b>Seasonal Fruit</b>       |         |                         |     |                         |             |             |       |                         |     |                         |             |             |         |                         |     |                         |             |             |

**Table S4: Changes to portion size (grams) between 1995 and 2007 for 2-4 year old children (cont)**

|                      | Females |                         |     |                         | Males       |             |     |                         | Persons |                         |             |             |     |                         |     |                         |             |             |
|----------------------|---------|-------------------------|-----|-------------------------|-------------|-------------|-----|-------------------------|---------|-------------------------|-------------|-------------|-----|-------------------------|-----|-------------------------|-------------|-------------|
|                      | n =     | 1995<br>Median<br>[IQR] | n = | 2007<br>Median<br>[IQR] | Δ<br>Median | p-<br>value | n = | 1995<br>Median<br>[IQR] | n =     | 2007<br>Median<br>[IQR] | Δ<br>Median | p-<br>value | n = | 1995<br>Median<br>[IQR] | n = | 2007<br>Median<br>[IQR] | Δ<br>Median | p-<br>value |
| Food                 |         |                         |     |                         |             |             |     |                         |         |                         |             |             |     |                         |     |                         |             |             |
| Mixed Berries/Grapes | 33      | 45 [68]                 | 187 | 50 [55]                 | 5           | 0.38        | 25  | 83 [93]                 | 177     | 56 [52]                 | -27         | 0.01        | 58  | 72 [57]                 | 364 | 50 [50]                 | -22         | 0.40        |
| Melon                | 19      | 150 [153]               | 84  | 75 [124]                | -75         | 0.05        | 11  | 285 [406]               | 106     | 111 [140]               | -174        | 0.04        | 30  | 161 [255]               | 190 | 87 [117]                | -74         | 0.02        |

**Table S5: Changes to portion size (grams) between 1995 and 2007 for 5-8 year old children**

| Food                      | Females |                   |      |                   | Males    |         |     |                   | Persons |                   |          |         |     |                   |      |                   |          |         |
|---------------------------|---------|-------------------|------|-------------------|----------|---------|-----|-------------------|---------|-------------------|----------|---------|-----|-------------------|------|-------------------|----------|---------|
|                           | n =     | 1995 Median [IQR] | n =  | 2007 Median [IQR] | Δ Median | p-value | n = | 1995 Median [IQR] | n =     | 2007 Median [IQR] | Δ Median | p-value | n = | 1995 Median [IQR] | n =  | 2007 Median [IQR] | Δ Median | p-value |
| <b>Drinks</b>             |         |                   |      |                   |          |         |     |                   |         |                   |          |         |     |                   |      |                   |          |         |
| Soft Drink                | 123     | 261 [117]         | 117  | 234 [148]         | -27      | 0.10    | 207 | 262 [181]         | 129     | 293 [190]         | 31       | 0.71    | 330 | 261 [194]         | 246  | 261 [171]         | 0        | 0.08    |
| Water                     | 303     | 500 [500]         | 1087 | 230 [195]         | -270     | <0.001  | 313 | 500 [750]         | 1076    | 250 [250]         | -250     | <0.001  | 616 | 500 [624]         | 2163 | 250 [245]         | -250     | <0.001  |
| Fruit Juice               | 142     | 210 [132]         | 282  | 210 [131]         | 0        | 0.01    | 169 | 210 [131]         | 345     | 241 [131]         | 31       | 0.47    | 311 | 210 [131]         | 627  | 210 [131]         | 0        | 0.02    |
| Tea/Coffee                | 34      | 171 [127]         | 33   | 180 [117]         | 9        | 0.10    | 34  | 254 [127]         | 38      | 233 [72]          | -21      | 0.09    | 68  | 254 [127]         | 71   | 200 [115]         | -54      | 0.02    |
| <b>Dairy Food</b>         |         |                   |      |                   |          |         |     |                   |         |                   |          |         |     |                   |      |                   |          |         |
| Whole Milk                | 198     | 194 [129]         | 376  | 194 [129]         | 0        | 0.08    | 240 | 258 [129]         | 418     | 206 [129]         | -52      | 0.06    | 438 | 217 [129]         | 196  | 200 [129]         | -17      | 0.008   |
| Reduced Fat Milk          | 55      | 194 [130]         | 124  | 155 [108]         | -39      | 0.02    | 41  | 260 [130]         | 147     | 194 [129]         | -66      | <0.001  | 96  | 195 [130]         | 271  | 170 [129]         | -25      | <0.001  |
| Flavored Milk             | 23      | 258 [102]         | 81   | 226 [72]          | -32      | 0.11    | 42  | 260 [52]          | 63      | 256 [124]         | -4       | 0.10    | 65  | 258 [67]          | 144  | 250 [93]          | -8       | 0.006   |
| Ice cream                 | 65      | 93 [66]           | 123  | 56 [81]           | -37      | <0.001  | 73  | 102 [113]         | 114     | 62 [73]           | -40      | <0.001  | 138 | 96 [76]           | 237  | 60 [75]           | -36      | <0.001  |
| Yoghurt                   | 28      | 150 [136]         | 107  | 100 [80]          | -50      | 0.08    | 20  | 142 [93]          | 121     | 100 [80]          | -42      | 0.04    | 48  | 150 [120]         | 228  | 100 [80]          | -50      | 0.01    |
| Cheese                    | 114     | 20 [12]           | 223  | 21 [20]           | 1        | 0.004   | 112 | 20 [19]           | 259     | 21 [11]           | 1        | 0.04    | 226 | 20 [17]           | 482  | 21 [16]           | 1        | <0.001  |
| <b>Breads and Cereals</b> |         |                   |      |                   |          |         |     |                   |         |                   |          |         |     |                   |      |                   |          |         |
| Breakfast Cereal          | 213     | 30 [23]           | 257  | 20 [21]           | -10      | 0.38    | 251 | 38 [15]           | 299     | 33 [18]           | -5       | 0.44    | 464 | 30 [15]           | 556  | 30 [15]           | 0        | 0.94    |
| White Bread               | 399     | 54 [32]           | 399  | 56 [27]           | 2        | 0.15    | 436 | 64 [24]           | 394     | 62 [18]           | -2       | 0.91    | 835 | 54 [32]           | 793  | 60 [27]           | 6        | 0.44    |
| Mixed Grain Bread         | 31      | 56 [34]           | 67   | 62 [34]           | 6        | 0.92    | 40  | 42 [28]           | 52      | 64 [31]           | 22       | <0.001  | 71  | 52 [40]           | 119  | 64 [28]           | 12       | 0.009   |
| Wholemeal Bread           | 51      | 54 [32]           | 115  | 57 [24]           | 3        | 0.54    | 76  | 57 [32]           | 151     | 60 [26]           | 3        | 0.31    | 127 | 54 [32]           | 266  | 60 [25]           | 6        | 0.25    |
| Rice                      | 28      | 122 [170]         | 73   | 111 [101]         | -11      | 0.79    | 53  | 190 [154]         | 64      | 162 [158]         | -28      | 0.70    | 81  | 190 [150]         | 137  | 144 [114]         | -46      | 0.32    |
| Pasta                     | 45      | 148 [148]         | 102  | 150 [115]         | 2        | 0.49    | 32  | 148 [145]         | 128     | 150 [150]         | 2        | 0.72    | 77  | 148 [125]         | 230  | 150 [133]         | 2        | 0.75    |
| Cake                      | 101     | 55 [45]           | 177  | 53 [51]           | -2       | 0.94    | 132 | 66 [79]           | 145     | 53 [50]           | -13      | 0.08    | 233 | 59 [72]           | 322  | 53 [50]           | -6       | 0.15    |
| <b>Sweets and</b>         |         |                   |      |                   |          |         |     |                   |         |                   |          |         |     |                   |      |                   |          |         |

**Table S5: Changes to portion size (grams) between 1995 and 2007 for 5-8 year old children (cont)**

| Food                     | Females |                         |     |                         |             |             | Males |                         |     |                         |             |             | Persons |                         |     |                         |             |             |
|--------------------------|---------|-------------------------|-----|-------------------------|-------------|-------------|-------|-------------------------|-----|-------------------------|-------------|-------------|---------|-------------------------|-----|-------------------------|-------------|-------------|
|                          | n =     | 1995<br>Median<br>[IQR] | n = | 2007<br>Median<br>[IQR] | Δ<br>Median | p-<br>value | n =   | 1995<br>Median<br>[IQR] | n = | 2007<br>Median<br>[IQR] | Δ<br>Median | p-<br>value | n =     | 1995<br>Median<br>[IQR] | n = | 2007<br>Median<br>[IQR] | Δ<br>Median | p-<br>value |
| <b>Snacks</b>            |         |                         |     |                         |             |             |       |                         |     |                         |             |             |         |                         |     |                         |             |             |
| Sweet pie/pastry         | 34      | 59 [97]                 | 27  | 50 [43]                 | -9          | 0.70        | 24    | 75 [73]                 | 30  | 60 [29]                 | -15         | 0.25        | 58      | 68 [72]                 | 57  | 60 [36]                 | -8          | 0.41        |
| Other desserts           | 38      | 140 [140]               | 42  | 145 [92]                | 5           | 0.82        | 48    | 140 [59]                | 41  | 150 [50]                | 10          | 0.55        | 86      | 140 [61]                | 83  | 150 [50]                | 10          | 0.56        |
| Plain sweet biscuits     | 98      | 16 [15]                 | 102 | 22 [12]                 | 6           | 0.01        | 133   | 20 [23]                 | 103 | 24 [19]                 | 4           | 0.13        | 231     | 18 [17]                 | 205 | 22 [15]                 | 4           | 0.01        |
| Cream/chocolate biscuits | 80      | 24 [23]                 | 76  | 20 [13]                 | -4          | 0.08        | 76    | 21 [23]                 | 87  | 21 [19]                 | 0           | 0.67        | 156     | 23 [24]                 | 163 | 20 [15]                 | -3          | 0.35        |
| Savoury Biscuits         | 101     | 15 [15]                 | 183 | 18 [15]                 | 3           | 0.47        | 113   | 20 [14]                 | 174 | 20 [13]                 | 0           | 0.96        | 214     | 18 [14]                 | 357 | 18 [13]                 | 0           | 0.71        |
| Muesli Bar               | 49      | 31 [2]                  | 59  | 31 [13]                 | 0           | 0.20        | 45    | 31 [3]                  | 66  | 31 [11]                 | 0           | <0.05       | 94      | 31 [2]                  | 125 | 31 [11]                 | 0           | 0.03        |
| <b>Main Meals</b>        |         |                         |     |                         |             |             |       |                         |     |                         |             |             |         |                         |     |                         |             |             |
| Mince Dish               | 37      | 80 [90]                 | 54  | 78 [99]                 | -2          | 0.96        | 42    | 124 [96]                | 85  | 85 [102]                | -39         | 0.24        | 79      | 97 [88]                 | 139 | 85 [96]                 | -12         | 0.45        |
| Plain Meat               | 66      | 49 [37]                 | 69  | 56 [50]                 | 7           | 0.09        | 68    | 56 [53]                 | 81  | 67 [59]                 | 11          | 0.40        | 134     | 52 [46]                 | 150 | 65 [53]                 | 13          | 0.07        |
| Crumbed Chicken          | 29      | 72 [71]                 | 59  | 66 [36]                 | -6          | 0.83        | 39    | 72 [54]                 | 56  | 82 [62]                 | 10          | 0.87        | 68      | 72 [61]                 | 115 | 72 [54]                 | 0           | 0.95        |
| Plain Chicken            | 56      | 45 [61]                 | 86  | 67 [71]                 | 22          | 0.12        | 65    | 70 [56]                 | 87  | 76 [85]                 | 6           | 0.07        | 121     | 67 [64]                 | 173 | 72 [80]                 | 5           | 0.04        |
| Fish                     | 39      | 60 [72]                 | 61  | 71 [67]                 | 11          | 0.01        | 32    | 50 [59]                 | 46  | 74 [87]                 | 24          | 0.008       | 71      | 58 [64]                 | 107 | 71 [70]                 | 13          | <0.001      |
| Soup                     | 19      | 253 [187]               | 36  | 300 [259]               | 47          | 0.72        | 35    | 255 [11]                | 30  | 253 [237]               | -2          | 0.30        | 54      | 255 [87]                | 66  | 259 [256]               | 4           | 0.76        |
| Sausages                 | 54      | 57 [33]                 | 65  | 57 [30]                 | 0           | 0.03        | 63    | 69 [52]                 | 78  | 58 [38]                 | -11         | 0.10        | 116     | 59 [48]                 | 143 | 58 [39]                 | -1          | 0.009       |
| Pizza                    | 27      | 72 [72]                 | 37  | 116 [87]                | 44          | 0.01        | 46    | 115 [103]               | 31  | 130 [134]               | 15          | 0.38        | 73      | 100 [88]                | 68  | 123 [101]               | 23          | 0.07        |
| Pie                      | 46      | 112 [87]                | 56  | 124 [96]                | 12          | 0.40        | 43    | 174 [174]               | 44  | 140 [58]                | -34         | 0.63        | 89      | 131 [85]                | 100 | 130 [64]                | -1          | 0.77        |
| <b>Other Foods</b>       |         |                         |     |                         |             |             |       |                         |     |                         |             |             |         |                         |     |                         |             |             |
| Chips (not potato)       | 59      | 22 [16]                 | 52  | 20 [23]                 | -2          | 0.95        | 70    | 21 [8]                  | 66  | 25 [25]                 | 4           | 0.14        | 129     | 21 [9]                  | 118 | 25 [24]                 | 4           | 0.33        |
| Potato crisps            | 92      | 25 [4]                  | 96  | 21 [1]                  | -4          | <0.001      | 93    | 25 [7]                  | 106 | 21 [30]                 | -4          | 0.52        | 185     | 25 [7]                  | 202 | 21 [7]                  | -4          | <0.001      |
| Ice block - water        | 42      | 73 [5]                  | 42  | 74 [7]                  | 1           | 0.41        | 57    | 74 [5]                  | 36  | 75 [8]                  | 1           | 0.19        | 99      | 74 [5]                  | 78  | 75 [6]                  | 1           | 0.14        |
| Chocolate                | 158     | 20 [18]                 | 166 | 20 [23]                 | 0           | 0.64        | 132   | 19 [23]                 | 159 | 20 [28]                 | 1           | 0.57        | 290     | 20 [19]                 | 325 | 20 [25]                 | 0           | 0.46        |
| Lollies                  | 119     | 15 [16]                 | 131 | 14 [16]                 | -1          | 0.87        | 118   | 13 [19]                 | 127 | 16 [14]                 | 3           | 0.12        | 237     | 14 [16]                 | 258 | 15 [16]                 | 1           | 0.19        |

**Table S5: Changes to portion size (grams) between 1995 and 2007 for 5-8 year old children (cont)**

| Food                         | Females |                   |     |                   |          |         | Males |                   |     |                   | Persons  |         |     |                   |     |                   |          |         |
|------------------------------|---------|-------------------|-----|-------------------|----------|---------|-------|-------------------|-----|-------------------|----------|---------|-----|-------------------|-----|-------------------|----------|---------|
|                              | n =     | 1995 Median [IQR] | n = | 2007 Median [IQR] | Δ Median | p-value | n =   | 1995 Median [IQR] | n = | 2007 Median [IQR] | Δ Median | p-value | n = | 1995 Median [IQR] | n = | 2007 Median [IQR] | Δ Median | p-value |
| Salad Dressing/Mayo full fat | 28      | 4 [18]            | 22  | 5 [13]            | 1        | 0.72    | 21    | 7 [7]             | 26  | 9 [15]            | 2        | 0.65    | 49  | 5 [14]            | 48  | 6 [14]            | 1        | 0.57    |
| Jam/Honey                    | 51      | 7 [6]             | 124 | 12 [7]            | 5        | 0.22    | 74    | 10 [6]            | 122 | 8 [7]             | -2       | 0.46    | 125 | 7 [7]             | 246 | 11 [7]            | 4        | 0.19    |
| Peanut Butter                | 82      | 13 [15]           | 84  | 10 [13]           | -3       | 0.95    | 102   | 9 [13]            | 96  | 10 [13]           | 1        | 0.41    | 184 | 10 [15]           | 180 | 10 [13]           | 0        | 0.66    |
| Tomato Sauce                 | 120     | 8 [16]            | 148 | 11 [16]           | 3        | 0.07    | 149   | 8 [16]            | 145 | 13 [16]           | 5        | 0.008   | 269 | 8 [16]            | 293 | 11 [16]           | 3        | 0.002   |
| Luncheon Meats               | 39      | 17 [15]           | 56  | 28 [21]           | 11       | 0.003   | 32    | 24 [63]           | 43  | 28 [36]           | 4        | 0.83    | 71  | 18 [27]           | 99  | 28 [37]           | 10       | 0.02    |
| Bacon/Ham                    | 60      | 25 [21]           | 107 | 34 [26]           | 9        | <0.001  | 72    | 22 [26]           | 128 | 29 [30]           | 7        | 0.01    | 132 | 24 [21]           | 235 | 30 [26]           | 6        | <0.001  |
| Eggs                         | 36      | 50 [23]           | 64  | 44 [36]           | -6       | 0.28    | 47    | 50 [59]           | 76  | 43 [52]           | -7       | 0.14    | 83  | 50 [47]           | 140 | 43 [45]           | -7       | 0.06    |
| <b>Fruit and Vegetables</b>  |         |                   |     |                   |          |         |       |                   |     |                   |          |         |     |                   |     |                   |          |         |
| Hot Chips                    | 63      | 100 [60]          | 108 | 75 [40]           | -25      | <0.001  | 113   | 100 [69]          | 97  | 77 [38]           | -23      | 0.002   | 176 | 100 [62]          | 205 | 75 [40]           | -25      | <0.001  |
| Potato                       | 104     | 116 [74]          | 111 | 75 [73]           | -41      | 0.003   | 102   | 91 [86]           | 106 | 92 [78]           | 1        | 0.41    | 206 | 93 [79]           | 217 | 75 [76]           | -18      | 0.008   |
| Pumpkin                      | 28      | 65 [86]           | 25  | 54 [59]           | -11      | 0.39    | 20    | 50 [45]           | 27  | 49 [69]           | -1       | 0.87    | 48  | 65 [56]           | 52  | 60 [54]           | -5       | 0.49    |
| Cauliflower                  | 15      | 33 [55]           | 24  | 34 [29]           | 1        | 0.30    | 12    | 33 [16]           | 27  | 29 [29]           | -4       | 0.99    | 27  | 33 [17]           | 51  | 29 [29]           | -4       | 0.38    |
| Green Beans                  | 32      | 35 [44]           | 37  | 26 [17]           | -9       | 0.06    | 30    | 31 [36]           | 33  | 32 [29]           | 1        | 0.66    | 62  | 35 [41]           | 64  | 26 [22]           | -9       | 0.10    |
| Peas                         | 54      | 40 [40]           | 61  | 20 [29]           | -20      | 0.04    | 50    | 40 [43]           | 56  | 22 [29]           | -18      | 0.008   | 104 | 40 [39]           | 117 | 20 [29]           | -20      | 0.001   |
| Broccoli                     | 27      | 23 [38]           | 63  | 26 [21]           | 3        | 0.89    | 30    | 45 [56]           | 67  | 26 [33]           | -19      | 0.03    | 57  | 34 [49]           | 63  | 26 [21]           | -8       | 0.13    |
| Carrots                      | 120     | 35 [31]           | 166 | 29 [28]           | -6       | 0.04    | 113   | 31 [37]           | 160 | 30 [37]           | -1       | 0.88    | 233 | 32 [34]           | 326 | 29 [33]           | -3       | 0.17    |
| Capsicum                     | 23      | 19 [25]           | 39  | 19 [17]           | 0        | 0.80    | 21    | 11 [19]           | 25  | 14 [10]           | 3        | 0.81    | 44  | 14 [16]           | 64  | 17 [15]           | 3        | 0.85    |
| Corn                         | 23      | 44 [45]           | 57  | 24 [48]           | -20      | 0.11    | 30    | 51 [53]           | 48  | 35 [37]           | -16      | 0.07    | 53  | 49 [47]           | 105 | 32 [44]           | -17      | 0.01    |
| Tomato                       | 75      | 48 [38]           | 77  | 60 [46]           | 12       | 0.20    | 49    | 45 [36]           | 82  | 47 [50]           | 2        | 0.37    | 124 | 46 [38]           | 159 | 51 [49]           | 5        | 0.19    |
| Lettuce                      | 66      | 14 [12]           | 59  | 8 [9]             | -6       | 0.32    | 63    | 15 [14]           | 72  | 11 [20]           | -4       | 0.82    | 129 | 15 [12]           | 131 | 9 [13]            | -6       | 0.44    |
| Celery/Cucumber              | 53      | 21 [17]           | 71  | 25 [18]           | 4        | 0.38    | 39    | 25 [30]           | 73  | 20 [30]           | -5       | 0.69    | 92  | 21 [23]           | 144 | 24 [24]           | 3        | 0.91    |
| Onion                        | 17      | 15 [27]           | 64  | 9 [12]            | -6       | 0.29    | 35    | 14 [22]           | 67  | 9 [14]            | -5       | 0.32    | 52  | 15 [24]           | 131 | 9 [12]            | -6       | 0.13    |
| Canned Fruit                 | 5       | 135 [29]          | 26  | 104 [95]          | -31      | 0.19    | 2     | 100 [80]          | 35  | 78 [84]           | -22      | 0.50    | 7   | 135 [47]          | 61  | 93 [83]           | -42      | 0.05    |

**Table S5: Changes to portion size (grams) between 1995 and 2007 for 5-8 year old children (cont)**

| Food                  | Females |                         |     |                         | Males       |             |     |                         | Persons |                         |             |             |     |                         |     |                         |             |             |
|-----------------------|---------|-------------------------|-----|-------------------------|-------------|-------------|-----|-------------------------|---------|-------------------------|-------------|-------------|-----|-------------------------|-----|-------------------------|-------------|-------------|
|                       | n =     | 1995<br>Median<br>[IQR] | n = | 2007<br>Median<br>[IQR] | Δ<br>Median | p-<br>value | n = | 1995<br>Median<br>[IQR] | n =     | 2007<br>Median<br>[IQR] | Δ<br>Median | p-<br>value | n = | 1995<br>Median<br>[IQR] | n = | 2007<br>Median<br>[IQR] | Δ<br>Median | p-<br>value |
| Dried Fruit           | 30      | 21 [29]                 | 30  | 27 [23]                 | 6           | 0.99        | 16  | 43 [42]                 | 36      | 21 [39]                 | -22         | 0.16        | 46  | 29 [30]                 | 66  | 25 [31]                 | -4          | 0.21        |
| Apple                 | 166     | 140 [59]                | 238 | 156 [72]                | 16          | 0.24        | 155 | 140 [26]                | 224     | 166 [58]                | 26          | 0.11        | 321 | 140 [41]                | 462 | 161 [58]                | 21          | <0.05       |
| Orange                | 70      | 101 [45]                | 116 | 86 [45]                 | -15         | 0.41        | 77  | 131 [58]                | 98      | 86 [59]                 | -45         | 0.03        | 147 | 101 [45]                | 214 | 86 [45]                 | -15         | 0.04        |
| Banana                | 77      | 96 [51]                 | 125 | 121 [27]                | 25          | <0.001      | 79  | 96 [26]                 | 129     | 121 [27]                | 25          | <0.001      | 156 | 96 [31]                 | 254 | 121 [27]                | 25          | <0.001      |
| <b>Seasonal Fruit</b> |         |                         |     |                         |             |             |     |                         |         |                         |             |             |     |                         |     |                         |             |             |
| Mixed Berries/Grapes  | 34      | 63 [49]                 | 73  | 60 [71]                 | -3          | 0.44        | 24  | 73 [122]                | 63      | 56 [49]                 | -17         | 0.11        | 58  | 63 [72]                 | 136 | 60 [78]                 | -3          | 0.59        |
| Melon                 | 15      | 151 [92]                | 55  | 133 [113]               | -18         | 0.80        | 18  | 83 [80]                 | 48      | 150 [217]               | 67          | 0.14        | 33  | 85 [106]                | 55  | 133 [113]               | 48          | 0.25        |



**Table S6: Changes to portion size (grams) between 1995 and 2007 for 9-12 year old children**

| Food                     | Females |              |      |              |      |         | Males |              |      |              |      |         | Persons |              |      |              |        |         |
|--------------------------|---------|--------------|------|--------------|------|---------|-------|--------------|------|--------------|------|---------|---------|--------------|------|--------------|--------|---------|
|                          | 1995    |              | 2007 |              | Δ    |         | 1995  |              | 2007 |              | Δ    |         | 1995    |              | 2007 |              | Δ      |         |
|                          | n =     | Median [IQR] | n =  | Median [IQR] | n    | p-value | n =   | Median [IQR] | n =  | Median [IQR] | n    | p-value | n =     | Median [IQR] | n =  | Median [IQR] | Median | p-value |
| <b>Drinks</b>            |         |              |      |              |      |         |       |              |      |              |      |         |         |              |      |              |        |         |
| Diet Soft Drink          | 25      | 250 [125]    | 32   | 278 [260]    | 28   | 0.90    | 36    | 300 [175]    | 31   | 300 [145]    | 0    | 0.57    | 61      | 281 [140]    | 63   | 280 [175]    | -1     | 0.65    |
| Soft Drink               | 176     | 313 [132]    | 194  | 263 [182]    | -50  | 0.02    | 198   | 391 [187]    | 209  | 245 [195]    | -146 | 0.26    | 374     | 327 [156]    | 403  | 304 [182]    | -23    | 0.01    |
| Water                    | 287     | 700[795]     | 1259 | 250 [228]    | -450 | <0.001  | 310   | 750 [879]    | 1110 | 250 [250]    | -500 | <0.001  | 597     | 750 [850]    | 2369 | 250 [235]    | -500   | <0.001  |
| Fruit Juice              | 129     | 263 [74]     | 322  | 263 [105]    | 0    | <0.001  | 118   | 262 [131]    | 266  | 261 [52]     | -1   | 0.43    | 247     | 262 [107]    | 588  | 241 [62]     | -21    | 0.006   |
| Tea/Coffee               | 119     | 254 [92]     | 89   | 240 [47]     | -14  | <0.001  | 42    | 254 [80]     | 32   | 240 [62]     | -14  | 0.007   | 77      | 254 [92]     | 57   | 240 [36]     | -14    | 0.003   |
| <b>Dairy Foods</b>       |         |              |      |              |      |         |       |              |      |              |      |         |         |              |      |              |        |         |
| Whole Milk               | 277     | 206 [140]    | 322  | 232 [129]    | 26   | 0.86    | 328   | 258 [194]    | 346  | 257 [257]    | -1   | 0.001   | 605     | 258 [129]    | 668  | 237 [129]    | -21    | 0.01    |
| Reduced Fat Milk         | 111     | 195 [130]    | 174  | 194 [172]    | -1   | 0.02    | 119   | 260 [130]    | 177  | 237 [131]    | -23  | 0.03    | 230     | 259 [130]    | 351  | 206 [129]    | -53    | 0.001   |
| Skim Milk                | 17      | 259 [162]    | 53   | 194 [211]    | -65  | 0.11    | 15    | 259 [169]    | 27   | 237 [193]    | -22  | <0.05   | 32      | 259 [129]    | 80   | 194 [199]    | -65    | 0.005   |
| Flavored Milk            | 24      | 307 [54]     | 88   | 258 [145]    | -49  | 0.56    | 41    | 292 [123]    | 137  | 258 [119]    | -34  | 0.22    | 65      | 304 [92]     | 225  | 258 [124]    | -46    | 0.18    |
| Cream/Sour Cream         | 24      | 20 [31]      | 26   | 23 [30]      | 3    | 0.39    | 18    | 19 [19]      | 28   | 20 [28]      | 1    | 0.58    | 42      | 20 [32]      | 54   | 20 [30]      | 0      | 0.35    |
| Ice cream                | 83      | 100 [110]    | 124  | 100 [74]     | 0    | 0.58    | 97    | 124 [125]    | 107  | 90 [174]     | -34  | 0.04    | 180     | 124 [126]    | 231  | 93 [74]      | -31    | 0.06    |
| Yoghurt                  | 25      | 207 [87]     | 78   | 100 [107]    | -107 | <0.001  | 24    | 200 [142]    | 77   | 100 [100]    | -100 | 0.002   | 49      | 200 [120]    | 155  | 100 [100]    | -100   | <0.001  |
| Cheese                   | 135     | 20 [19]      | 252  | 21 [15]      | 1    | 0.007   | 129   | 21 [19]      | 203  | 21 [21]      | 0    | 0.13    | 264     | 21 [17]      | 455  | 21 [20]      | 0      | 0.003   |
| <b>Breads and Cereal</b> |         |              |      |              |      |         |       |              |      |              |      |         |         |              |      |              |        |         |
| Cooked Porridge          | 6       | 336 [531]    | 23   | 130 [260]    | -206 | 0.06    | 4     | 311 [332]    | 26   | 358 [218]    | 47   | 0.88    | 10      | 336 [423]    | 49   | 260 [281]    | -76    | 0.21    |
| Breakfast Cereal         | 160     | 38 [30]      | 199  | 41 [30]      | 3    | 0.88    | 243   | 60 [32]      | 271  | 45 [36]      | -15  | 0.02    | 403     | 45 [38]      | 470  | 45 [30]      | 0      | 0.05    |
| White Bread              | 402     | 57 [32]      | 400  | 62 [24]      | 5    | 0.36    | 429   | 64 [26]      | 402  | 64 [26]      | 0    | 0.02    | 831     | 64 [28]      | 802  | 64 [32]      | 0      | 0.23    |

**Table S6: Changes to portion size (grams) between 1995 and 2007 for 9-12 year old children (cont)**

| Food                     | Females |              |      |              |      |         | Males |              |      |              |      |         | Persons |              |      |              |        |         |
|--------------------------|---------|--------------|------|--------------|------|---------|-------|--------------|------|--------------|------|---------|---------|--------------|------|--------------|--------|---------|
|                          | 1995    |              | 2007 |              | Δ    |         | 1995  |              | 2007 |              | Δ    |         | 1995    |              | 2007 |              | Δ      |         |
|                          | n =     | Median [IQR] | n =  | Median [IQR] | n    | p-value | n =   | Median [IQR] | n =  | Median [IQR] | n    | p-value | n =     | Median [IQR] | n =  | Median [IQR] | Median | p-value |
| Mixed Grain Bread        | 27      | 56 [17]      | 66   | 64 [25]      | 8    | 0.52    | 24    | 68 [19]      | 43   | 66 [29]      | -2   | 0.76    | 51      | 68 [17]      | 109  | 64 [27]      | -4     | 0.80    |
| Wholemeal Bread          | 51      | 64 [16]      | 97   | 64 [28]      | 0    | 0.74    | 70    | 64 [20]      | 99   | 64 [16]      | 0    | 0.18    | 121     | 64 [12]      | 196  | 64 [24]      | 0      | 0.21    |
| Rice                     | 39      | 190 [160]    | 86   | 158 [121]    | -32  | 0.01    | 36    | 190 [226]    | 73   | 190 [165]    | 0    | 0.23    | 75      | 190 [190]    | 159  | 190 [125]    | 0      | 0.008   |
| Pasta                    | 24      | 230 [148]    | 134  | 150 [146]    | -80  | 0.14    | 31    | 261 [200]    | 131  | 225 [196]    | -36  | 0.56    | 55      | 237 [158]    | 265  | 188 [173]    | -49    | 0.14    |
| <b>Sweets and Snacks</b> |         |              |      |              |      |         |       |              |      |              |      |         |         |              |      |              |        |         |
| Cake                     | 105     | 61 [67]      | 195  | 63 [70]      | 2    | 0.24    | 116   | 66 [65]      | 166  | 82 [102]     | 16   | 0.05    | 221     | 64 [68]      | 361  | 72 [85]      | 8      | 0.05    |
| Sweet pie/pastry         | 36      | 86 [105]     | 52   | 63 [57]      | -23  | <0.05   | 24    | 71 [96]      | 42   | 80 [74]      | 9    | 0.93    | 60      | 82 [99]      | 94   | 75 [64]      | -7     | 0.10    |
| Other desserts           | 28      | 140 [82]     | 72   | 133 [82]     | -7   | 0.95    | 34    | 150 [165]    | 61   | 150 [280]    | 0    | 0.81    | 133     | 150 [107]    | 133  | 143 [160]    | -7     | 0.88    |
| Plain sweet biscuits     | 75      | 22 [22]      | 104  | 20 [17]      | -2   | 0.22    | 76    | 23 [21]      | 75   | 25 [22]      | 2    | 0.23    | 151     | 22 [24]      | 179  | 22 [18]      | 0      | 0.82    |
| Cream/chocolate biscuits | 53      | 21 [22]      | 100  | 30 [30]      | 9    | 0.007   | 80    | 31 [28]      | 112  | 30 [50]      | -1   | 0.38    | 133     | 27 [24]      | 212  | 30 [35]      | 3      | 0.03    |
| Savoury Biscuits         | 72      | 21 [23]      | 169  | 18 [13]      | -3   | 0.40    | 81    | 20 [20]      | 127  | 24 [12]      | 4    | 0.63    | 153     | 20 [20]      | 296  | 20 [13]      | 0      | 0.66    |
| Muesli Bar               | 26      | 31 [1]       | 71   | 31 [11]      | 0    | 0.79    | 35    | 31 [2]       | 72   | 31 [11]      | 0    | 0.36    | 61      | 31 [2]       | 143  | 31 [11]      | 0      | 0.63    |
| <b>Main Meals</b>        |         |              |      |              |      |         |       |              |      |              |      |         |         |              |      |              |        |         |
| Mince Dish               | 37      | 89 [111]     | 88   | 129 [135]    | 40   | 0.22    | 43    | 100 [127]    | 97   | 140 [205]    | 40   | 0.09    | 80      | 96 [117]     | 185  | 138 [185]    | 42     | 0.04    |
| Plain Meat               | 85      | 65 [62]      | 111  | 93 [98]      | 28   | 0.02    | 93    | 77 [73]      | 121  | 92 [138]     | 15   | 0.003   | 178     | 70 [66]      | 232  | 93 [125]     | 23     | <0.001  |
| Mixed chicken dish       | 11      | 200 [290]    | 30   | 100 [163]    | -100 | 0.18    | 10    | 229 [189]    | 29   | 127 [172]    | -102 | 0.06    | 21      | 206 [237]    | 59   | 108 [108]    | -98    | 0.02    |
| Crumbed Chicken          | 18      | 72 [59]      | 84   | 89 [98]      | 17   | 0.33    | 33    | 85 [61]      | 69   | 143 [211]    | 58   | 0.001   | 51      | 72 [56]      | 153  | 109 [233]    | 37     | 0.01    |
| Plain Chicken            | 64      | 67 [82]      | 99   | 78 [78]      | 11   | 0.13    | 43    | 72 [100]     | 95   | 95 [85]      | 23   | 0.16    | 107     | 68 [82]      | 194  | 84 [90]      | 16     | 0.03    |
| Fish                     | 13      | 113 [75]     | 45   | 100 [73]     | -13  | 0.12    | 24    | 96 [116]     | 41   | 108 [80]     | 12   | 0.41    | 37      | 99 [101]     | 86   | 104 [74]     | 5      | 0.78    |
| Soup                     | 24      | 306 [253]    | 68   | 260 [260]    | -46  | 0.07    | 35    | 313 [315]    | 57   | 286 [307]    | -27  | 0.38    | 59      | 313 [306]    | 125  | 274 [260]    | -39    | 0.06    |

**Table S6: Changes to portion size (grams) between 1995 and 2007 for 9-12 year old children (cont)**

| Food                               | Females |              |      |              |     |         | Males |              |      |              |     |         | Persons |              |      |              |        |         |
|------------------------------------|---------|--------------|------|--------------|-----|---------|-------|--------------|------|--------------|-----|---------|---------|--------------|------|--------------|--------|---------|
|                                    | 1995    |              | 2007 |              | Δ   |         | 1995  |              | 2007 |              | Δ   |         | 1995    |              | 2007 |              | Δ      |         |
|                                    | n =     | Median [IQR] | n =  | Median [IQR] | n   | p-value | n =   | Median [IQR] | n =  | Median [IQR] | n   | p-value | n =     | Median [IQR] | n =  | Median [IQR] | Median | p-value |
| Sausages                           | 48      | 59 [52]      | 68   | 58 [73]      | -1  | 0.48    | 72    | 63 [77]      | 71   | 72 [55]      | 9   | 0.71    | 120     | 61 [62]      | 139  | 58 [67]      | -3     | 0.40    |
| Hamburger                          | 24      | 122 [86]     | 45   | 136 [110]    | 14  | 0.93    | 21    | 204 [113]    | 58   | 220 [250]    | 16  | 0.20    | 45      | 159 [95]     | 103  | 196 [164]    | 37     | 0.25    |
| Pizza                              | 32      | 87 [143]     | 48   | 110 [97]     | 23  | 0.36    | 45    | 117 [143]    | 37   | 164 [155]    | 47  | 0.04    | 77      | 104 [133]    | 85   | 132 [134]    | 28     | 0.11    |
| Pie                                | 46      | 165 [70]     | 77   | 130 [82]     | -35 | 0.68    | 43    | 175 [57]     | 90   | 174 [130]    | -1  | 0.12    | 89      | 174 [64]     | 167  | 170 [103]    | -4     | 0.39    |
| <b>Other Foods</b>                 |         |              |      |              |     |         |       |              |      |              |     |         |         |              |      |              |        |         |
| Chips (not potato)                 | 70      | 21 [14]      | 84   | 37 [60]      | 16  | <0.001  | 53    | 25 [26]      | 86   | 39 [188]     | 14  | 0.42    | 123     | 21 [12]      | 170  | 37 [99]      | 16     | <0.001  |
| Potato crisps                      | 76      | 25 [8]       | 107  | 21 [9]       | -4  | 0.004   | 70    | 25 [3]       | 119  | 21 [21]      | -4  | 0.04    | 146     | 25 [3]       | 226  | 21 [14]      | -4     | <0.001  |
| Ice block – creamy                 | 39      | 74 [20]      | 29   | 65 [8]       | -9  | 0.007   | 39    | 82 [27]      | 30   | 68 [36]      | -14 | 0.22    | 78      | 78 [19]      | 59   | 68 [50]      | -10    | 0.007   |
| Ice block - water                  | 34      | 75 [32]      | 35   | 75 [8]       | 0   | 0.64    | 34    | 75 [80]      | 33   | 76 [10]      | 1   | 0.81    | 68      | 75 [62]      | 68   | 76 [6]       | 1      | 0.88    |
| Chocolate                          | 116     | 23 [23]      | 182  | 18 [24]      | -5  | 0.15    | 125   | 23 [30]      | 171  | 20 [31]      | -3  | 0.28    | 241     | 23 [28]      | 353  | 20 [27]      | -3     | 0.07    |
| Lollies                            | 104     | 14 [17]      | 139  | 16 [23]      | 2   | <0.05   | 90    | 15 [28]      | 131  | 16 [25]      | 1   | 0.43    | 194     | 15 [18]      | 270  | 16 [23]      | 1      | 0.04    |
| Salad Dressing/Mayo naise full fat | 37      | 9 [15]       | 43   | 9 [15]       | 0   | 0.64    | 31    | 14 [14]      | 40   | 11 [15]      | -3  | 0.70    | 68      | 9 [14]       | 83   | 10 [14]      | 1      | 0.57    |
| Jam/Honey                          | 47      | 7 [7]        | 104  | 12 [14]      | 5   | 0.04    | 82    | 14 [20]      | 89   | 14 [17]      | 0   | 0.17    | 129     | 10 [13]      | 193  | 13 [16]      | 3      | 0.03    |
| Peanut Butter                      | 62      | 11 [10]      | 99   | 13 [31]      | 2   | 0.006   | 76    | 11 [13]      | 112  | 19 [35]      | 8   | <0.001  | 138     | 11 [13]      | 211  | 14 [32]      | 3      | <0.001  |
| Tomato Sauce                       | 105     | 11 [16]      | 160  | 13 [16]      | 2   | 0.03    | 141   | 13 [16]      | 166  | 11 [16]      | -2  | 0.39    | 246     | 11 [16]      | 326  | 13 [16]      | 2      | 0.05    |
| Luncheon Meats                     | 18      | 23 [26]      | 54   | 40 [92]      | 17  | 0.02    | 56    | 28 [25]      | 64   | 35 [245]     | 7   | 0.009   | 74      | 27 [25]      | 118  | 40 [190]     | 13     | <0.001  |
| Bacon/Ham                          | 66      | 27 [24]      | 107  | 30 [30]      | 3   | 0.008   | 65    | 26 [19]      | 99   | 30 [25]      | 4   | 0.04    | 131     | 26 [18]      | 206  | 30 [26]      | 4      | <0.001  |
| Eggs                               | 43      | 49 [20]      | 60   | 43 [39]      | -6  | 0.94    | 51    | 50 [56]      | 67   | 50 [41]      | 0   | 0.995   | 94      | 49 [37]      | 127  | 49 [41]      | 0      | 0.93    |
| <b>Fruit and Vegetables</b>        |         |              |      |              |     |         |       |              |      |              |     |         |         |              |      |              |        |         |
| Hot Chips                          | 81      | 100 [60]     | 114  | 100 [75]     | 0   | 0.17    | 104   | 150 [100]    | 103  | 110 [75]     | -40 | <0.001  | 185     | 128 [69]     | 217  | 104 [75]     | -24    | <0.001  |
| Potato                             | 118     | 123 [144]    | 131  | 107 [73]     | -16 | <0.001  | 129   | 127 [143]    | 118  | 110 [118]    | -17 | 0.03    | 247     | 124 [135]    | 249  | 110 [84]     | -14    | <0.001  |

**Table S6: Changes to portion size (grams) between 1995 and 2007 for 9-12 year old children (cont)**

| Food                  | Females |              |      |              |     |         | Males |              |      |              |     |         | Persons |              |      |              |        |         |
|-----------------------|---------|--------------|------|--------------|-----|---------|-------|--------------|------|--------------|-----|---------|---------|--------------|------|--------------|--------|---------|
|                       | 1995    |              | 2007 |              | Δ   |         | 1995  |              | 2007 |              | Δ   |         | 1995    |              | 2007 |              | Δ      |         |
|                       | n =     | Median [IQR] | n =  | Median [IQR] | n   | p-value | n =   | Median [IQR] | n =  | Median [IQR] | n   | p-value | n =     | Median [IQR] | n =  | Median [IQR] | Median | p-value |
| Pumpkin               | 37      | 65 [91]      | 38   | 65 [78]      | 0   | 0.88    | 40    | 85 [94]      | 26   | 68 [89]      | -17 | 0.66    | 77      | 84 [95]      | 64   | 65 [81]      | -19    | 0.78    |
| Cauliflower           | 17      | 55 [33]      | 28   | 44 [29]      | -11 | 0.99    | 22    | 33 [31]      | 27   | 50 [40]      | 17  | <0.05   | 39      | 33 [39]      | 55   | 45 [35]      | 12     | 0.12    |
| Green Beans           | 31      | 42 [32]      | 52   | 32 [26]      | -10 | 0.13    | 36    | 42 [48]      | 32   | 32 [47]      | -10 | 0.79    | 67      | 42 [38]      | 84   | 32 [38]      | -10    | 0.16    |
| Peas                  | 68      | 53 [54]      | 69   | 27 [40]      | -26 | 0.003   | 62    | 53 [58]      | 60   | 34 [30]      | -19 | 0.03    | 130     | 53 [55]      | 129  | 33 [35]      | -20    | <0.001  |
| Broccoli              | 27      | 65 [77]      | 73   | 30 [24]      | -35 | 0.01    | 39    | 49 [64]      | 57   | 30 [31]      | -19 | 0.20    | 66      | 55 [77]      | 130  | 30 [30]      | -25    | 0.007   |
| Carrots               | 106     | 38 [37]      | 183  | 29 [26]      | -9  | 0.08    | 106   | 39 [37]      | 145  | 29 [29]      | -10 | 0.01    | 212     | 39 [36]      | 328  | 29 [27]      | -10    | 0.002   |
| Capsicum              | 27      | 17 [16]      | 44   | 21 [19]      | 4   | 0.54    | 23    | 12 [11]      | 43   | 20 [18]      | 8   | 0.02    | 50      | 13 [17]      | 87   | 20 [18]      | 7      | <0.05   |
| Corn                  | 28      | 44 [50]      | 54   | 43 [43]      | -1  | 0.82    | 25    | 43 [53]      | 51   | 44 [29]      | 1   | 0.24    | 53      | 44 [52]      | 105  | 43 [51]      | -1     | 0.30    |
| Tomato                | 78      | 46 [54]      | 129  | 60 [40]      | 14  | 0.10    | 82    | 58 [65]      | 97   | 60 [40]      | 2   | 0.87    | 160     | 48 [54]      | 226  | 60 [40]      | 12     | 0.31    |
| Lettuce               | 100     | 15 [21]      | 106  | 15 [21]      | 0   | 0.85    | 82    | 15 [11]      | 74   | 16 [21]      | 1   | 0.09    | 182     | 15 [17]      | 180  | 15 [21]      | 0      | 0.22    |
| Celery/Cucumber       | 58      | 28 [25]      | 82   | 25 [22]      | -3  | 0.83    | 45    | 19 [21]      | 57   | 25 [20]      | 6   | 0.20    | 103     | 22 [24]      | 139  | 25 [21]      | 3      | 0.50    |
| Onion                 | 34      | 17 [25]      | 87   | 14 [14]      | -3  | 0.61    | 39    | 22 [20]      | 81   | 14 [15]      | -8  | 0.001   | 73      | 18 [25]      | 168  | 14 [16]      | -4     | 0.007   |
| Apple                 | 147     | 140 [26]     | 244  | 166 [58]     | 26  | 0.34    | 149   | 159 [26]     | 178  | 166 [57]     | 7   | 0.52    | 296     | 140 [26]     | 422  | 166 [58]     | 26     | 0.32    |
| Orange                | 46      | 116 [45]     | 104  | 86 [59]      | -30 | 0.02    | 65    | 101 [45]     | 77   | 86 [52]      | -15 | 0.31    | 111     | 101 [45]     | 181  | 86 [59]      | -15    | 0.02    |
| Banana                | 44      | 102 [38]     | 105  | 121 [27]     | 19  | 0.67    | 59    | 101 [32]     | 91   | 121 [27]     | 20  | 0.008   | 103     | 102 [30]     | 196  | 121 [27]     | 19     | 0.02    |
| <b>Seasonal Fruit</b> |         |              |      |              |     |         |       |              |      |              |     |         |         |              |      |              |        |         |
| Mixed Berries/Grapes  | 27      | 79 [190]     | 58   | 83 [91]      | 4   | 0.48    | 27    | 86 [123]     | 44   | 84 [94]      | -2  | 0.65    | 54      | 86 [136]     | 102  | 84 [85]      | -2     | 0.40    |
| Melon                 | 20      | 136 [179]    | 33   | 161 [174]    | 25  | 0.65    | 16    | 148 [155]    | 28   | 177 [241]    | 29  | 0.37    | 36      | 145 [177]    | 61   | 161 [211]    | 16     | 0.36    |

**Table S7: Changes to portion size (grams) between 1995 and 2007 for 13-16 year old children**

| Food                        | Females |                         |      |                         |             | Males       |     |                         |      |                         | Persons     |             |     |                         |      |                         |             |             |
|-----------------------------|---------|-------------------------|------|-------------------------|-------------|-------------|-----|-------------------------|------|-------------------------|-------------|-------------|-----|-------------------------|------|-------------------------|-------------|-------------|
|                             | n =     | 1995<br>Median<br>[IQR] | n =  | 2007<br>Median<br>[IQR] | Δ<br>Median | p-<br>value | n = | 1995<br>Median<br>[IQR] | n =  | 2007<br>Median<br>[IQR] | Δ<br>Median | p-<br>value | n = | 1995<br>Median<br>[IQR] | n =  | 2007<br>Median<br>[IQR] | Δ<br>Median | p-<br>value |
| <b>Drinks</b>               |         |                         |      |                         |             |             |     |                         |      |                         |             |             |     |                         |      |                         |             |             |
| Diet Soft Drink             | 31      | 375 [125]               | 61   | 375 [138]               | 0           | 0.62        | 26  | 375 [133]               | 84   | 375 [75]                | 0           | 0.07        | 57  | 375 [215]               | 145  | 375 [125]               | 0           | 0.54        |
| Soft Drink                  | 148     | 313 [132]               | 301  | 340 [178]               | 27          | 0.38        | 243 | 391 [260]               | 397  | 391 [187]               | 0           | 0.09        | 391 | 391 [187]               | 698  | 391 [156]               | 0           | 0.43        |
| Water                       | 238     | 775 [750]               | 1594 | 300 [335]               | -475        | <0.001      | 229 | 750 [750]               | 1564 | 300 [370]               | -450        | <0.001      | 467 | 750 [750]               | 3158 | 300 [380]               | -450        | <0.001      |
| Fruit Juice                 | 122     | 263 [171]               | 425  | 262 [52]                | -1          | 0.03        | 86  | 263 [162]               | 401  | 262 [81]                | -1          | 0.29        | 208 | 263 [118]               | 826  | 262 [105]               | -1          | 0.03        |
| Tea or Coffee               | 104     | 254 [51]                | 193  | 240 [33]                | -14         | <0.001      | 98  | 254 [30]                | 160  | 260 [54]                | 6           | 0.85        | 202 | 254 [51]                | 353  | 240 [38]                | -14         | 0.001       |
| <b>Dairy Foods</b>          |         |                         |      |                         |             |             |     |                         |      |                         |             |             |     |                         |      |                         |             |             |
| Whole Milk                  | 209     | 129 [193]               | 357  | 206 [176]               | 77          | 0.02        | 266 | 258 [258]               | 553  | 258 [214]               | 0           | 0.78        | 475 | 258 [224]               | 910  | 258 [194]               | 0           | <0.05       |
| Reduced Fat Milk            | 83      | 194 [195]               | 196  | 175 [196]               | -19         | 0.40        | 103 | 259 [275]               | 216  | 258 [231]               | -1          | 0.85        | 186 | 222 [260]               | 412  | 237 [216]               | 15          | 0.50        |
| Flavored Milk               | 27      | 304 [87]                | 138  | 278 [142]               | -26         | 0.81        | 36  | 353 [317]               | 130  | 353 [267]               | 0           | 0.29        | 63  | 310 [257]               | 268  | 308 [244]               | -2          | 0.27        |
| Cream                       | 20      | 21 [29]                 | 56   | 15 [19]                 | -5          | 0.46        | 10  | 20 [32]                 | 38   | 20 [31]                 | 0           | 0.99        | 30  | 20 [29]                 | 94   | 17 [27]                 | -3          | 0.57        |
| Ice Cream                   | 45      | 124 [111]               | 107  | 112 [112]               | -12         | 0.83        | 62  | 178 [186]               | 136  | 112 [106]               | -66         | 0.001       | 107 | 128 [176]               | 243  | 112 [108]               | -16         | <0.01       |
| Yoghurt                     | 25      | 200 [77]                | 108  | 150 [114]               | -50         | 0.09        | 19  | 200 [159]               | 79   | 200 [159]               | 0           | 0.72        | 44  | 200 [77]                | 187  | 156 [100]               | -44         | 0.14        |
| Cheese                      | 123     | 21 [22]                 | 330  | 22 [25]                 | 1           | 0.03        | 122 | 24 [23]                 | 297  | 33 [25]                 | 9           | 0.005       | 245 | 21 [26]                 | 627  | 23 [25]                 | 2           | <0.001      |
| <b>Breads &amp; Cereals</b> |         |                         |      |                         |             |             |     |                         |      |                         |             |             |     |                         |      |                         |             |             |
| Breakfast Cereal            | 104     | 45 [30]                 | 214  | 45 [38]                 | 0           | 0.18        | 184 | 60 [45]                 | 385  | 60 [45]                 | 0           | 0.62        | 288 | 60 [50]                 | 599  | 60 [40]                 | 0           | 0.18        |
| White Bread                 | 237     | 64 [12]                 | 468  | 64 [34]                 | 0           | 0.97        | 316 | 64 [56]                 | 582  | 66 [20]                 | 2           | 0.17        | 553 | 64 [27]                 | 1050 | 64 [21]                 | 0           | 0.28        |
| Wholemeal Bread             | 46      | 54 [26]                 | 132  | 64 [31]                 | 10          | 0.02        | 32  | 64 [58]                 | 114  | 68 [16]                 | 4           | 0.45        | 81  | 54 [29]                 | 246  | 64 [26]                 | 10          | 0.01        |
| Mixed Grain Bread           | 39      | 56 [32]                 | 110  | 68 [29]                 | 12          | 0.03        | 22  | 68 [13]                 | 84   | 68 [28]                 | 0           | 0.04        | 61  | 56 [18]                 | 194  | 68 [22]                 | 12          | 0.002       |
| English Muffins             | 12      | 59 [58]                 | 36   | 63 [34]                 | 4           | 0.22        | 11  | 60 [42]                 | 43   | 94 [63]                 | 34          | 0.006       | 23  | 60 [42]                 | 79   | 67 [59]                 | 7           | 0.003       |
| Pasta                       | 35      | 222 [148]               | 151  | 210 [168]               | -12         | 0.83        | 23  | 306 [248]               | 162  | 253 [182]               | -53         | 0.12        | 58  | 289 [189]               | 313  | 225 [152]               | -64         | 0.45        |
| Rice                        | 24      | 190 [135]               | 117  | 190 [186]               | 0           | 0.72        | 26  | 293 [190]               | 125  | 247 [237]               | -45         | 0.45        | 50  | 231 [192]               | 242  | 216 [224]               | -15         | 0.39        |
| <b>Sweets &amp; Snacks</b>  |         |                         |      |                         |             |             |     |                         |      |                         |             |             |     |                         |      |                         |             |             |

**Table S7: Changes to portion size (grams) between 1995 and 2007 for 13-16 year old children (cont)**

| Food                  | Females |                         |     |                         |             |             | Males |                         |     |                         |             |             | Persons |                         |     |                         |             |             |
|-----------------------|---------|-------------------------|-----|-------------------------|-------------|-------------|-------|-------------------------|-----|-------------------------|-------------|-------------|---------|-------------------------|-----|-------------------------|-------------|-------------|
|                       | n =     | 1995<br>Median<br>[IQR] | n = | 2007<br>Median<br>[IQR] | Δ<br>Median | p-<br>value | n =   | 1995<br>Median<br>[IQR] | n = | 2007<br>Median<br>[IQR] | Δ<br>Median | p-<br>value | n =     | 1995<br>Median<br>[IQR] | n = | 2007<br>Median<br>[IQR] | Δ<br>Median | p-<br>value |
| Cakes/Pikelets        | 77      | 63 [61]                 | 210 | 72 [80]                 | 9           | 0.03        | 56    | 87 [79]                 | 193 | 80 [81]                 | -7          | 0.75        | 133     | 70 [69]                 | 403 | 76 [80]                 | 6           | 0.16        |
| Sweet Pies/Pastries   | 28      | 100 [129]               | 50  | 67 [61]                 | -33         | 0.13        | 35    | 102 [149]               | 53  | 80 [70]                 | -22         | 0.40        | 63      | 102 [136]               | 103 | 75 [72]                 | -27         | 0.09        |
| Other Puddings        | 13      | 140 [89]                | 48  | 115 [105]               | -25         | 0.94        | 19    | 140 [93]                | 37  | 150 [130]               | 10          | 0.45        | 32      | 140 [90]                | 85  | 140 [105]               | 0           | 0.80        |
| Plain Sweet Biscuits  | 32      | 33 [25]                 | 104 | 22 [22]                 | -11         | 0.10        | 45    | 30 [25]                 | 106 | 28 [24]                 | -2          | 0.55        | 77      | 32 [25]                 | 210 | 24 [24]                 | -8          | 0.09        |
| Chocolate Biscuits    | 41      | 34 [27]                 | 89  | 23 [22]                 | -11         | 0.11        | 47    | 35 [24]                 | 116 | 28 [21]                 | -7          | 0.01        | 88      | 35 [24]                 | 205 | 25 [21]                 | -10         | 0.003       |
| Dry Savoury Biscuits  | 57      | 20 [17]                 | 154 | 24 [20]                 | 4           | 0.11        | 43    | 24 [23]                 | 127 | 25 [23]                 | 1           | 0.47        | 100     | 22 [17]                 | 281 | 25 [20]                 | 3           | 0.09        |
| Muesli Bars           | 15      | 31 [0]                  | 112 | 31 [10]                 | 0           | 0.83        | 28    | 31 [2]                  | 123 | 31 [11]                 | 0           | 0.89        | 43      | 31 [0]                  | 235 | 31 [11]                 | 0           | 0.99        |
| <b>Mail Meals</b>     |         |                         |     |                         |             |             |       |                         |     |                         |             |             |         |                         |     |                         |             |             |
| Mince Dish            | 40      | 143 [187]               | 88  | 85 [103]                | -58         | 0.004       | 43    | 130 [140]               | 101 | 150 [166]               | 20          | 0.16        | 83      | 142 [178]               | 189 | 118.5 [140]             | -23         | 0.43        |
| Plain Meat            | 77      | 72 [68]                 | 141 | 80 [78]                 | 8           | 0.16        | 70    | 90 [92]                 | 159 | 104 [98]                | 14          | 0.28        | 147     | 86 [82]                 | 300 | 88 [84]                 | 2           | 0.06        |
| Chicken with Sauce    | 15      | 150 [126]               | 40  | 111 [133]               | -39         | 0.07        | 9     | 216 [274]               | 58  | 200 [189]               | -16         | 0.85        | 24      | 181 [158]               | 98  | 143 [185]               | -38         | 0.46        |
| Crumbed Chicken       | 24      | 92 [104]                | 61  | 99 [89]                 | 7           | 0.81        | 42    | 85 [54]                 | 77  | 143 [135]               | 58          | <0.001      | 66      | 90 [78]                 | 138 | 117 [130]               | 28          | 0.006       |
| Plain Chicken         | 60      | 68 [84]                 | 130 | 101 [86]                | 34          | 0.02        | 58    | 108 [77]                | 163 | 120 [108]               | 12          | 0.06        | 118     | 89 [98]                 | 293 | 107 [100]               | 18          | 0.002       |
| Soup                  | 14      | 305 [259]               | 74  | 329 [199]               | 24          | 0.95        | 12    | 506 [370]               | 61  | 300 [268]               | -206        | 0.21        | 26      | 380 [266]               | 135 | 320 [218]               | -60         | 0.33        |
| Sausage/<br>Frankfurt | 22      | 59 [41]                 | 59  | 58 [48]                 | -1          | 0.44        | 40    | 81 [80]                 | 98  | 82 [57]                 | 1           | 0.51        | 62      | 127 [66]                | 157 | 114 [57]                | -13         | 0.34        |
| Hamburger             | 28      | 159 [57]                | 46  | 191 [113]               | 32          | 0.15        | 30    | 190 [103]               | 42  | 203 [124]               | 13          | 0.74        | 58      | 159 [95]                | 88  | 201 [123]               | 42          | 0.54        |
| Pizza                 | 27      | 74 [88]                 | 56  | 142 [166]               | 68          | <0.001      | 41    | 100 [144]               | 87  | 225 [184]               | 125         | <0.001      | 68      | 91 [116]                | 143 | 174 [193]               | 83          | <0.001      |
| Pie/Sausage Roll      | 34      | 164 [64]                | 75  | 140 [64]                | -24         | 0.76        | 56    | 174 [75]                | 106 | 174 [60]                | 0           | 0.76        | 90      | 174 [36]                | 181 | 170 [60]                | -4          | 0.59        |
| <b>Other Foods</b>    |         |                         |     |                         |             |             |       |                         |     |                         |             |             |         |                         |     |                         |             |             |
| Chips (not potato)    | 37      | 22 [33]                 | 75  | 28 [30]                 | 6           | 0.16        | 34    | 25 [37]                 | 58  | 50 [40]                 | 25          | 0.52        | 71      | 25 [30]                 | 133 | 30 [36]                 | 5           | 0.20        |
| Potato Chips          | 44      | 25 [25]                 | 145 | 21 [29]                 | -4          | 0.03        | 58    | 25 [25]                 | 147 | 21 [29]                 | -4          | 0.09        | 102     | 25 [25]                 | 292 | 21 [29]                 | -4          | 0.006       |
| Chocolate             | 109     | 33 [37]                 | 237 | 24 [29]                 | -9          | 0.13        | 79    | 41 [40]                 | 177 | 30 [37]                 | -11         | 0.11        | 188     | 36 [36]                 | 414 | 26 [34]                 | -10         | 0.03        |

**Table S7: Changes to portion size (grams) between 1995 and 2007 for 13-16 year old children (cont)**

| Food                              | Females |                         |     |                         |             | Males       |     |                         |     |                         | Persons     |             |     |                         |     |                         |             |             |
|-----------------------------------|---------|-------------------------|-----|-------------------------|-------------|-------------|-----|-------------------------|-----|-------------------------|-------------|-------------|-----|-------------------------|-----|-------------------------|-------------|-------------|
|                                   | n =     | 1995<br>Median<br>[IQR] | n = | 2007<br>Median<br>[IQR] | Δ<br>Median | p-<br>value | n = | 1995<br>Median<br>[IQR] | n = | 2007<br>Median<br>[IQR] | Δ<br>Median | p-<br>value | n = | 1995<br>Median<br>[IQR] | n = | 2007<br>Median<br>[IQR] | Δ<br>Median | p-<br>value |
| Lollies                           | 47      | 13 [8]                  | 176 | 15 [22]                 | 2           | 0.87        | 36  | 26 [46]                 | 149 | 28 [29]                 | 2           | 0.80        | 83  | 15 [20]                 | 325 | 18 [30]                 | 3           | 0.73        |
| Salad Dressing/Mayo (not low fat) | 31      | 10 [16]                 | 74  | 10 [15]                 | 0           | 0.96        | 35  | 14 [12]                 | 84  | 10 [15]                 | -4          | 0.80        | 66  | 14 [14]                 | 158 | 10 [15]                 | -4          | 0.92        |
| Jam/Honey                         | 33      | 7 [7]                   | 151 | 13 [19]                 | 6           | 0.005       | 24  | 14 [18]                 | 130 | 14 [18]                 | 0           | 0.52        | 57  | 10 [11]                 | 281 | 13 [19]                 | 3           | 0.009       |
| Peanut Butter                     | 17      | 13 [14]                 | 90  | 12 [13]                 | -1          | 0.94        | 33  | 13 [22]                 | 115 | 19 [13]                 | 6           | 0.70        | 50  | 13 [19]                 | 205 | 13 [15]                 | 0           | 0.97        |
| Tomato Sauce                      | 94      | 11 [16]                 | 191 | 22 [17]                 | 11          | <0.001      | 135 | 22 [16]                 | 253 | 22 [20]                 | 0           | 0.01        | 229 | 13 [16]                 | 444 | 22 [18]                 | 9           | <0.001      |
| Luncheon Meat                     | 24      | 21 [28]                 | 40  | 36 [34]                 | 15          | 0.14        | 26  | 47 [37]                 | 57  | 38 [47]                 | -11         | 0.55        | 50  | 35 [42]                 | 97  | 36 [34]                 | 1           | 0.54        |
| Bacon/Ham                         | 50      | 23 [24]                 | 160 | 27 [22]                 | 4           | 0.03        | 74  | 37 [41]                 | 175 | 40 [35]                 | 3           | 0.18        | 124 | 34 [25]                 | 335 | 36 [33]                 | 2           | <0.05       |
| Eggs                              | 22      | 49 [39]                 | 108 | 43 [54]                 | -6          | 0.90        | 46  | 67 [58]                 | 91  | 43 [49]                 | -24         | 0.01        | 68  | 50 [61]                 | 199 | 43 [55]                 | -7          | 0.30        |
| <b>Fruit and Vegetables</b>       |         |                         |     |                         |             |             |     |                         |     |                         |             |             |     |                         |     |                         |             |             |
| Hot Chips                         | 65      | 114 [50]                | 187 | 112 [75]                | -2          | 0.75        | 93  | 150 [60]                | 168 | 144 [41]                | -6          | 0.51        | 158 | 137 [50]                | 355 | 133 [51]                | -4          | 0.19        |
| Potato                            | 101     | 123 [102]               | 165 | 111 [100]               | -12         | 0.13        | 87  | 184 [139]               | 166 | 146 [124]               | -38         | 0.05        | 188 | 138 [131]               | 331 | 122 [121]               | -16         | 0.04        |
| Pumpkin                           | 32      | 86 [78]                 | 51  | 77 [75]                 | -9          | 0.83        | 26  | 69 [180]                | 27  | 90 [110]                | 21          | 0.59        | 58  | 75 [81]                 | 78  | 85 [75]                 | 10          | 0.60        |
| Green Beans                       | 26      | 42 [47]                 | 63  | 33 [34]                 | -9          | 0.96        | 22  | 70 [79]                 | 60  | 49 [33]                 | -21         | 0.02        | 48  | 63 [53]                 | 123 | 43 [34]                 | -20         | 0.15        |
| Peas                              | 39      | 40 [53]                 | 81  | 40 [37]                 | 0           | 0.22        | 42  | 75 [48]                 | 81  | 43 [60]                 | -32         | 0.02        | 81  | 53 [47]                 | 162 | 41 [63]                 | -12         | 0.01        |
| Broccoli                          | 29      | 49 [45]                 | 88  | 30 [31]                 | -19         | 0.16        | 21  | 65 [72]                 | 83  | 33 [34]                 | -32         | 0.08        | 50  | 51 [65]                 | 171 | 33 [31]                 | -18         | 0.03        |
| Carrot                            | 106     | 29 [37]                 | 230 | 29 [30]                 | 0           | 0.80        | 74  | 39 [35]                 | 200 | 34 [25]                 | -5          | 0.64        | 180 | 31 [36]                 | 430 | 31 [30]                 | 0           | 0.97        |
| Capsicum                          | 32      | 15 [22]                 | 61  | 23 [17]                 | 8           | 0.11        | 26  | 39 [44]                 | 55  | 21 [19]                 | -18         | 0.05        | 58  | 20 [30]                 | 116 | 22 [18]                 | 2           | 0.85        |
| Corn                              | 26      | 50 [66]                 | 59  | 43 [57]                 | -7          | 0.38        | 10  | 80 [52]                 | 56  | 57 [58]                 | -23         | 0.22        | 36  | 62 [62]                 | 115 | 44 [56]                 | -18         | 0.27        |
| Tomato                            | 87      | 45 [33]                 | 147 | 60 [53]                 | 15          | 0.008       | 60  | 60 [54]                 | 154 | 63 [55]                 | 3           | 0.25        | 147 | 48 [54]                 | 301 | 60 [55]                 | 12          | 0.003       |
| Lettuce                           | 74      | 15 [21]                 | 138 | 16 [16]                 | 1           | 0.003       | 74  | 16 [20]                 | 161 | 16 [20]                 | 0           | 0.47        | 148 | 15 [21]                 | 299 | 16 [20]                 | 1           | 0.01        |
| Celery/ Cucumber                  | 40      | 20 [24]                 | 108 | 26 [28]                 | 6           | 0.47        | 20  | 24 [12]                 | 87  | 30 [20]                 | 6           | 0.12        | 60  | 23 [17]                 | 195 | 29 [24]                 | 6           | 0.13        |
| Onion                             | 33      | 18 [37]                 | 156 | 13 [15]                 | -5          | 0.06        | 43  | 30 [40]                 | 182 | 19 [23]                 | -11         | 0.005       | 76  | 25 [39]                 | 338 | 17 [18]                 | -8          | <0.001      |
| Apple                             | 99      | 140 [26]                | 245 | 166 [10]                | 26          | 0.003       | 80  | 140 [26]                | 205 | 166 [5]                 | 26          | <0.001      | 179 | 140 [26]                | 450 | 166 [5]                 | 26          | <0.001      |

**Table S7: Changes to portion size (grams) between 1995 and 2007 for 13-16 year old children (cont)**

| Food                  | Females |                         |     |                         |                                | Males |                         |     |                         |                                | Persons |                         |     |                         |                                |
|-----------------------|---------|-------------------------|-----|-------------------------|--------------------------------|-------|-------------------------|-----|-------------------------|--------------------------------|---------|-------------------------|-----|-------------------------|--------------------------------|
|                       | n =     | 1995<br>Median<br>[IQR] | n = | 2007<br>Median<br>[IQR] | $\Delta$<br>p-<br>Median value | n =   | 1995<br>Median<br>[IQR] | n = | 2007<br>Median<br>[IQR] | $\Delta$<br>p-<br>Median value | n =     | 1995<br>Median<br>[IQR] | n = | 2007<br>Median<br>[IQR] | $\Delta$<br>p-<br>Median value |
| Banana                | 24      | 106 [39]                | 97  | 121 [27]                | 15 0.006                       | 28    | 102 [36]                | 116 | 121 [27]                | 19 0.003                       | 52      | 102 [36]                | 213 | 121 [27]                | 19 <0.001                      |
| Orange                | 26      | 131 [45]                | 158 | 86 [45]                 | -45 0.13                       | 35    | 131 [51]                | 122 | 101 [45]                | -30 0.08                       | 61      | 131 [40]                | 280 | 99 [45]                 | -32 0.02                       |
| <b>Seasonal Fruit</b> |         |                         |     |                         |                                |       |                         |     |                         |                                |         |                         |     |                         |                                |
| Grapes / Berries      | 13      | 57 [24]                 | 69  | 82 [139]                | 25 0.24                        | 13    | 86 [271]                | 46  | 60 [100]                | -26 0.80                       | 26      | 68 [75]                 | 115 | 76 [139]                | 8 0.55                         |
